# Supplementary material for: Synthesis of enantiopure glycidol derivatives via a one-pot two-step enzymatic cascade
Source: Royal Society of Chemistry journal article supplement (doi:10.1039/c4ob02186j), 2014-12-08

## Supporting Information

### Synthesis of enantiopure glycidol derivatives via a one-pot two-step enzymatic cascade

*Yu-Chang Liu, Yan Liu, and Zhong-Liu Wu\**

<sup>a</sup> Key Laboratory of Environmental and Applied Microbiology, Chengdu Institute of Biology, Chinese Academy of Sciences, Chengdu 610041, China.

<sup>b</sup> Environmental Microbiology Key Laboratory of Sichuan Province, Chengdu 610041, China.

<sup>c</sup> University of the Chinese Academy of Sciences, Beijing 100049, China.

\*Address correspondence to: Prof. Zhong-Liu Wu. Chengdu Institute of Biology, Chinese Academy of Sciences 9 South Renmin Road, 4th Section Chengdu, Sichuan 610041 P.R.China. Telephone: 86-28-82890434 Fax: 86-28-82890434 E-mail: [wuzhl@cib.ac.cn](mailto:wuzhl@cib.ac.cn)

- **Table S1** Bioreduction of 1-phenylprop-2-en-1-one (**1a**) with S-specific ketoreductases
- <sup>1</sup>H NMR Spectra
- Chiral HPLC

**Table S1** Bioreduction of 1-phenylprop-2-en-1-one (**1a**) with S-specific ketoreductases.

| Entry | Enzyme           | Conv. (%) | ee (%) |
|-------|------------------|-----------|--------|
| 1     | <i>Ch</i> KRED03 | 99 ± 1    | > 99   |
| 2     | <i>Ch</i> KRED11 | 84 ± 1    | > 99   |
| 3     | <i>Ch</i> KRED13 | 52 ± 1    | 0      |
| 4     | <i>Ch</i> KRED14 | 41 ± 2    | 90     |
| 5     | <i>Ch</i> KRED15 | 60 ± 2    | > 99   |
| 6     | <i>Ch</i> KRED26 | 15 ± 1    | 0      |

## **<sup>1</sup>H NMR Spectra**

**1b-14b**

**1c-14c**

**6d**

**14d**

## **Chiral HPLC**

**1b-14b**

**1c-14c**

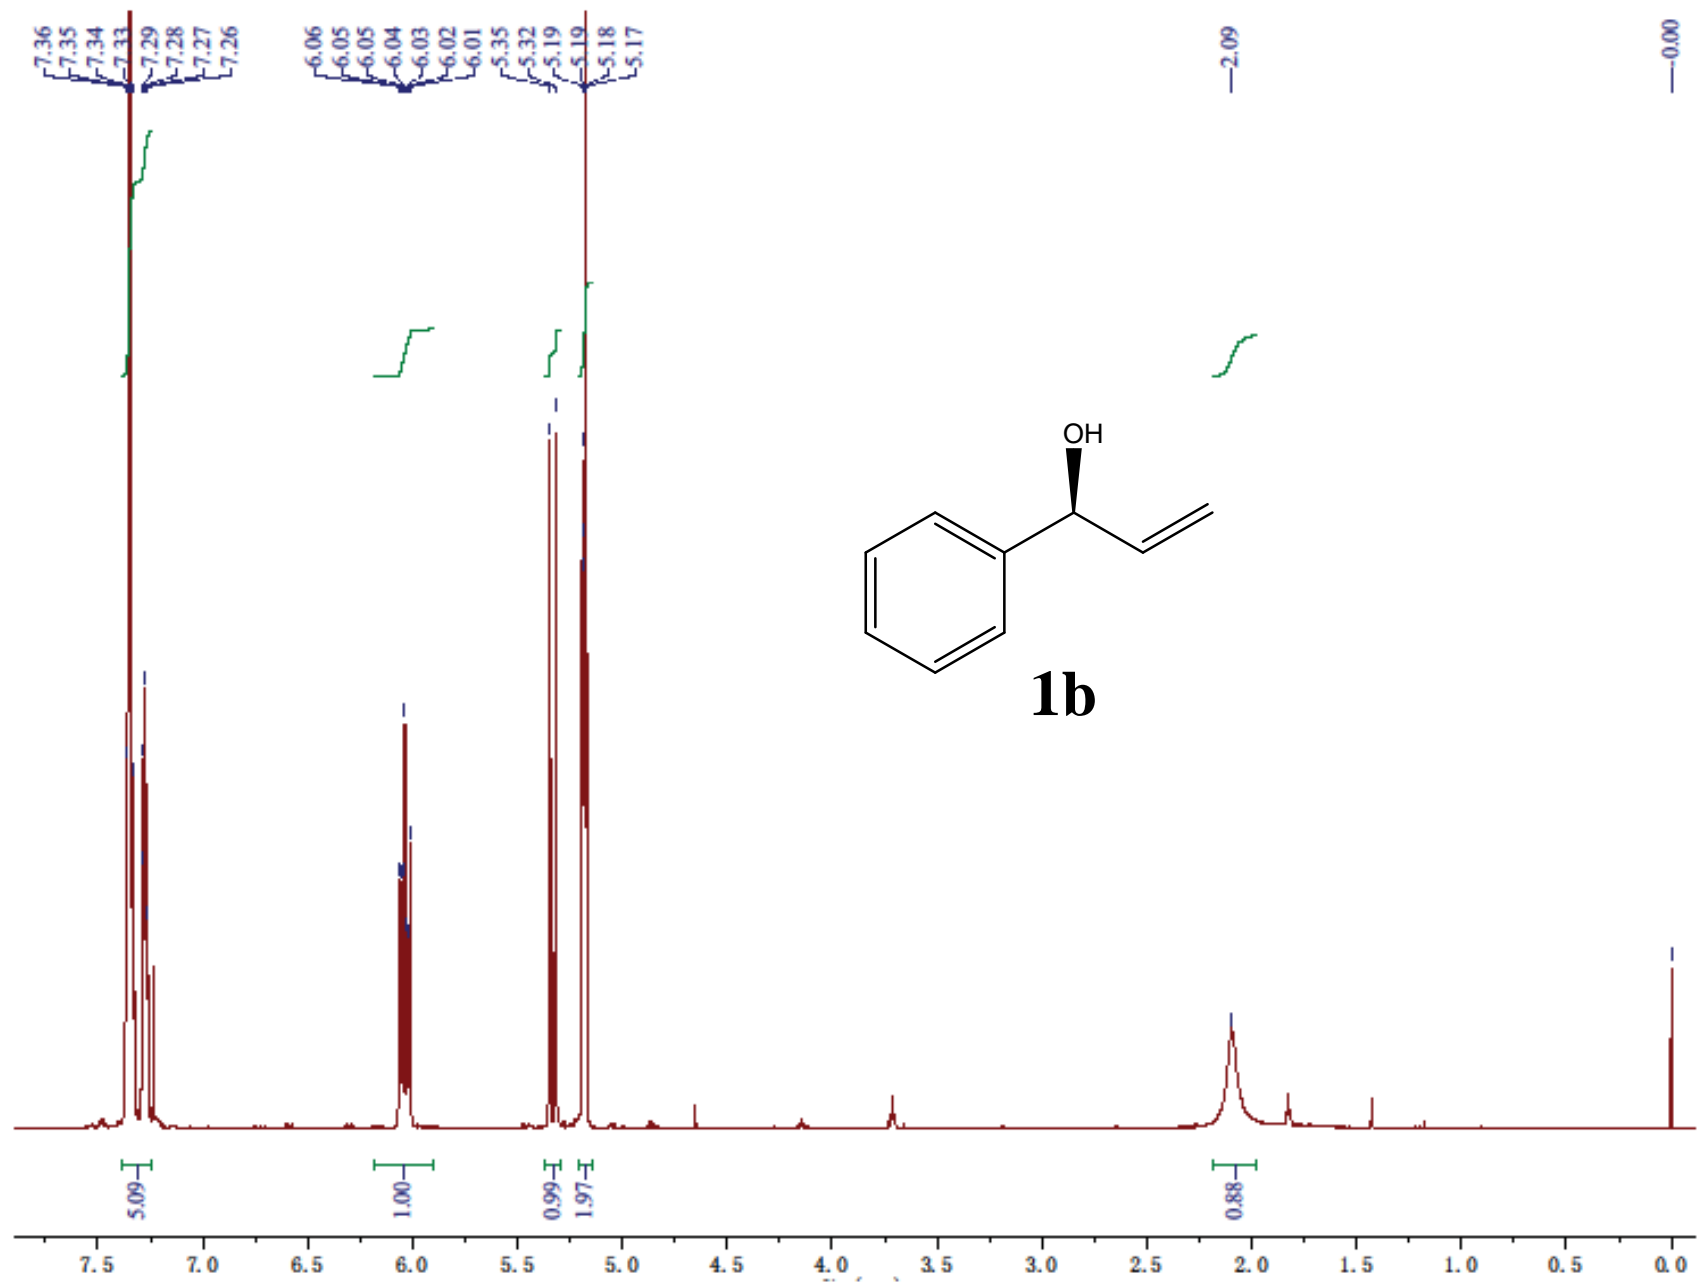

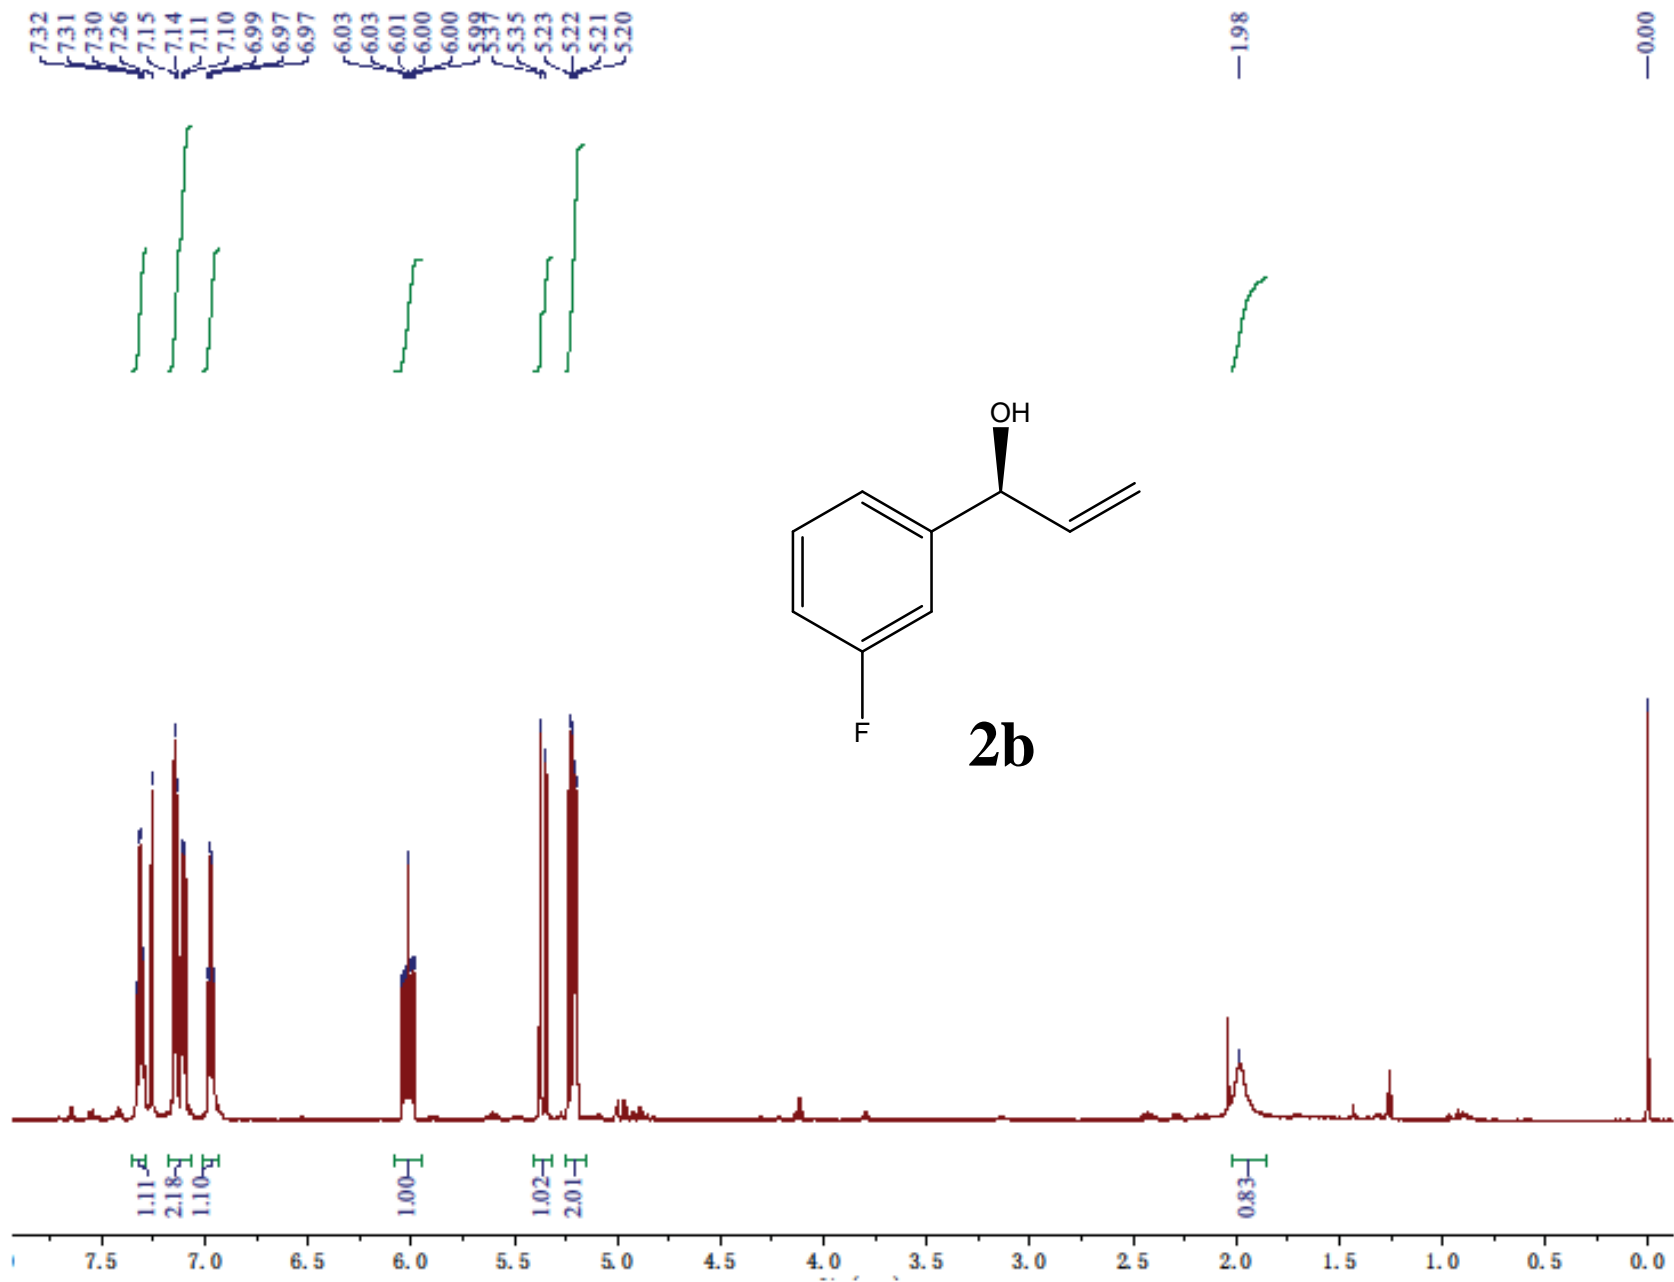

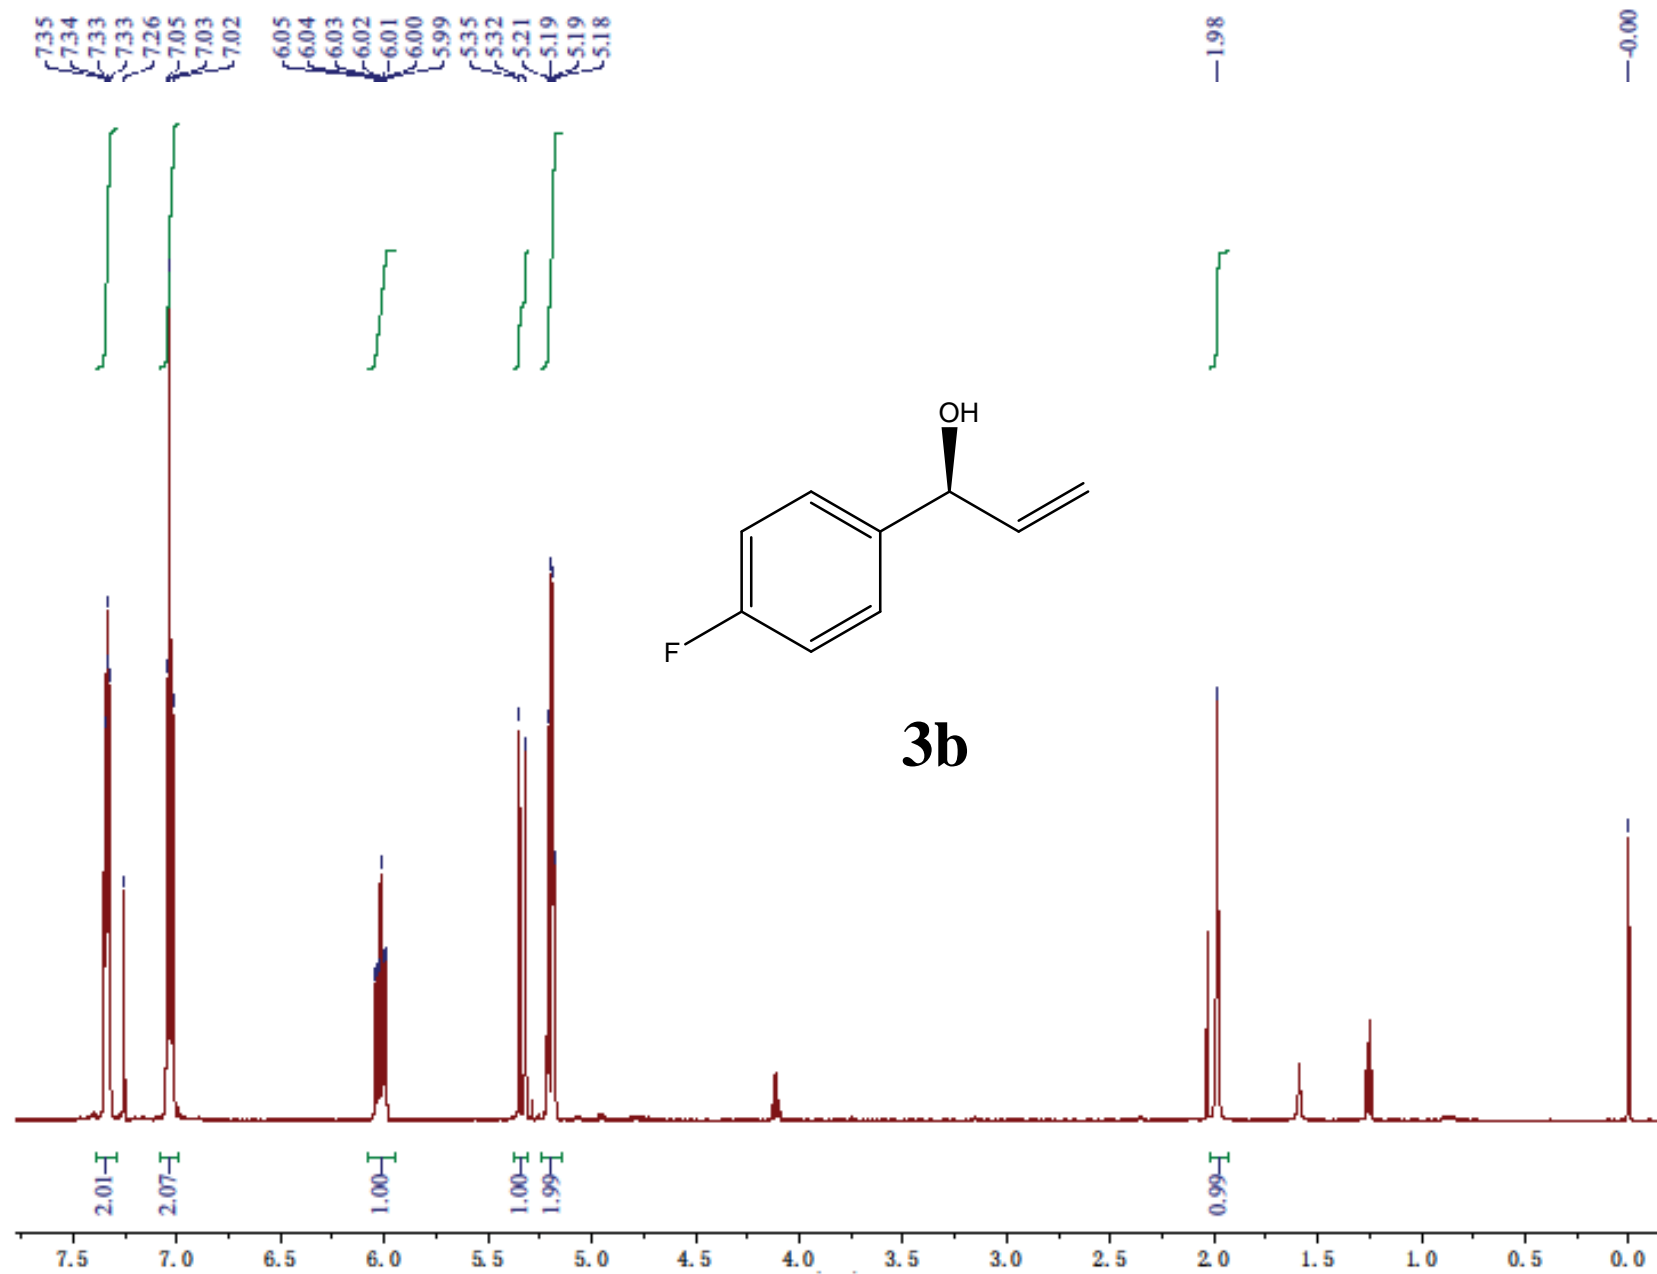

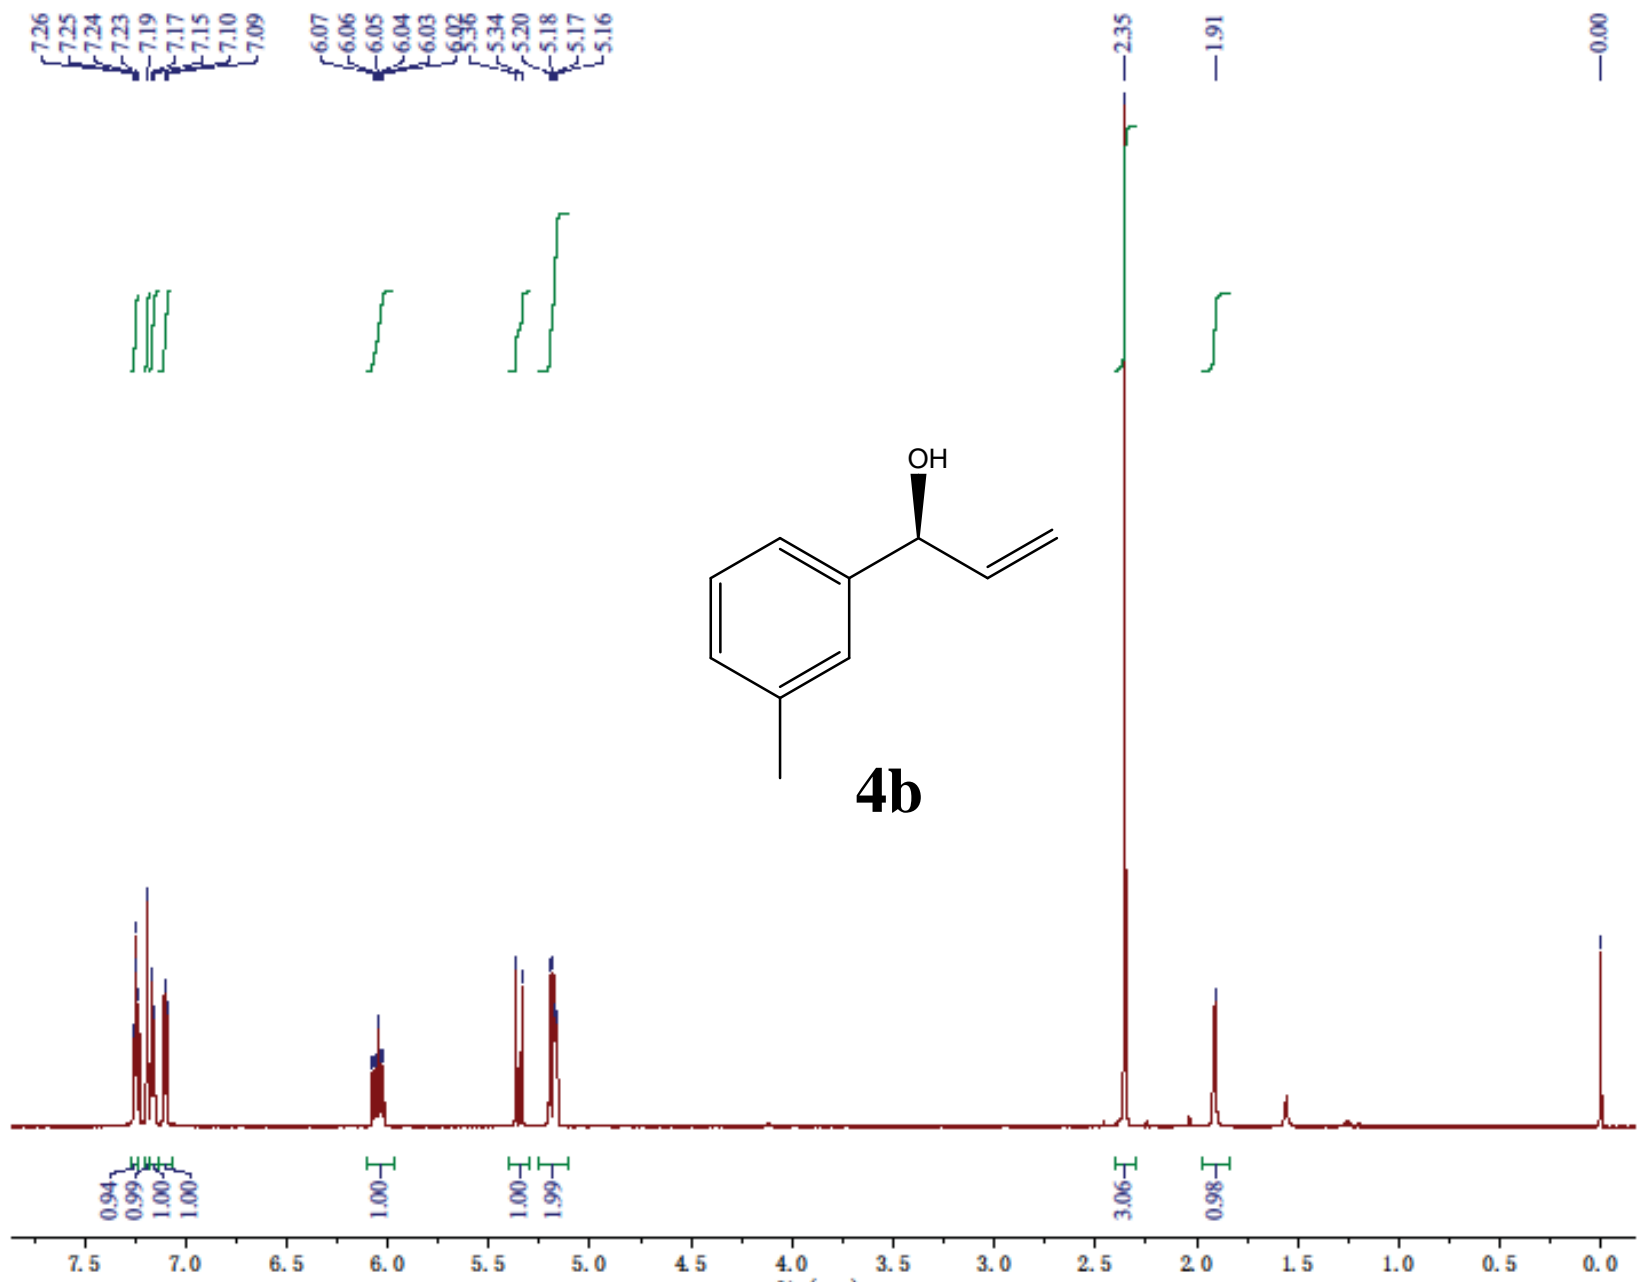

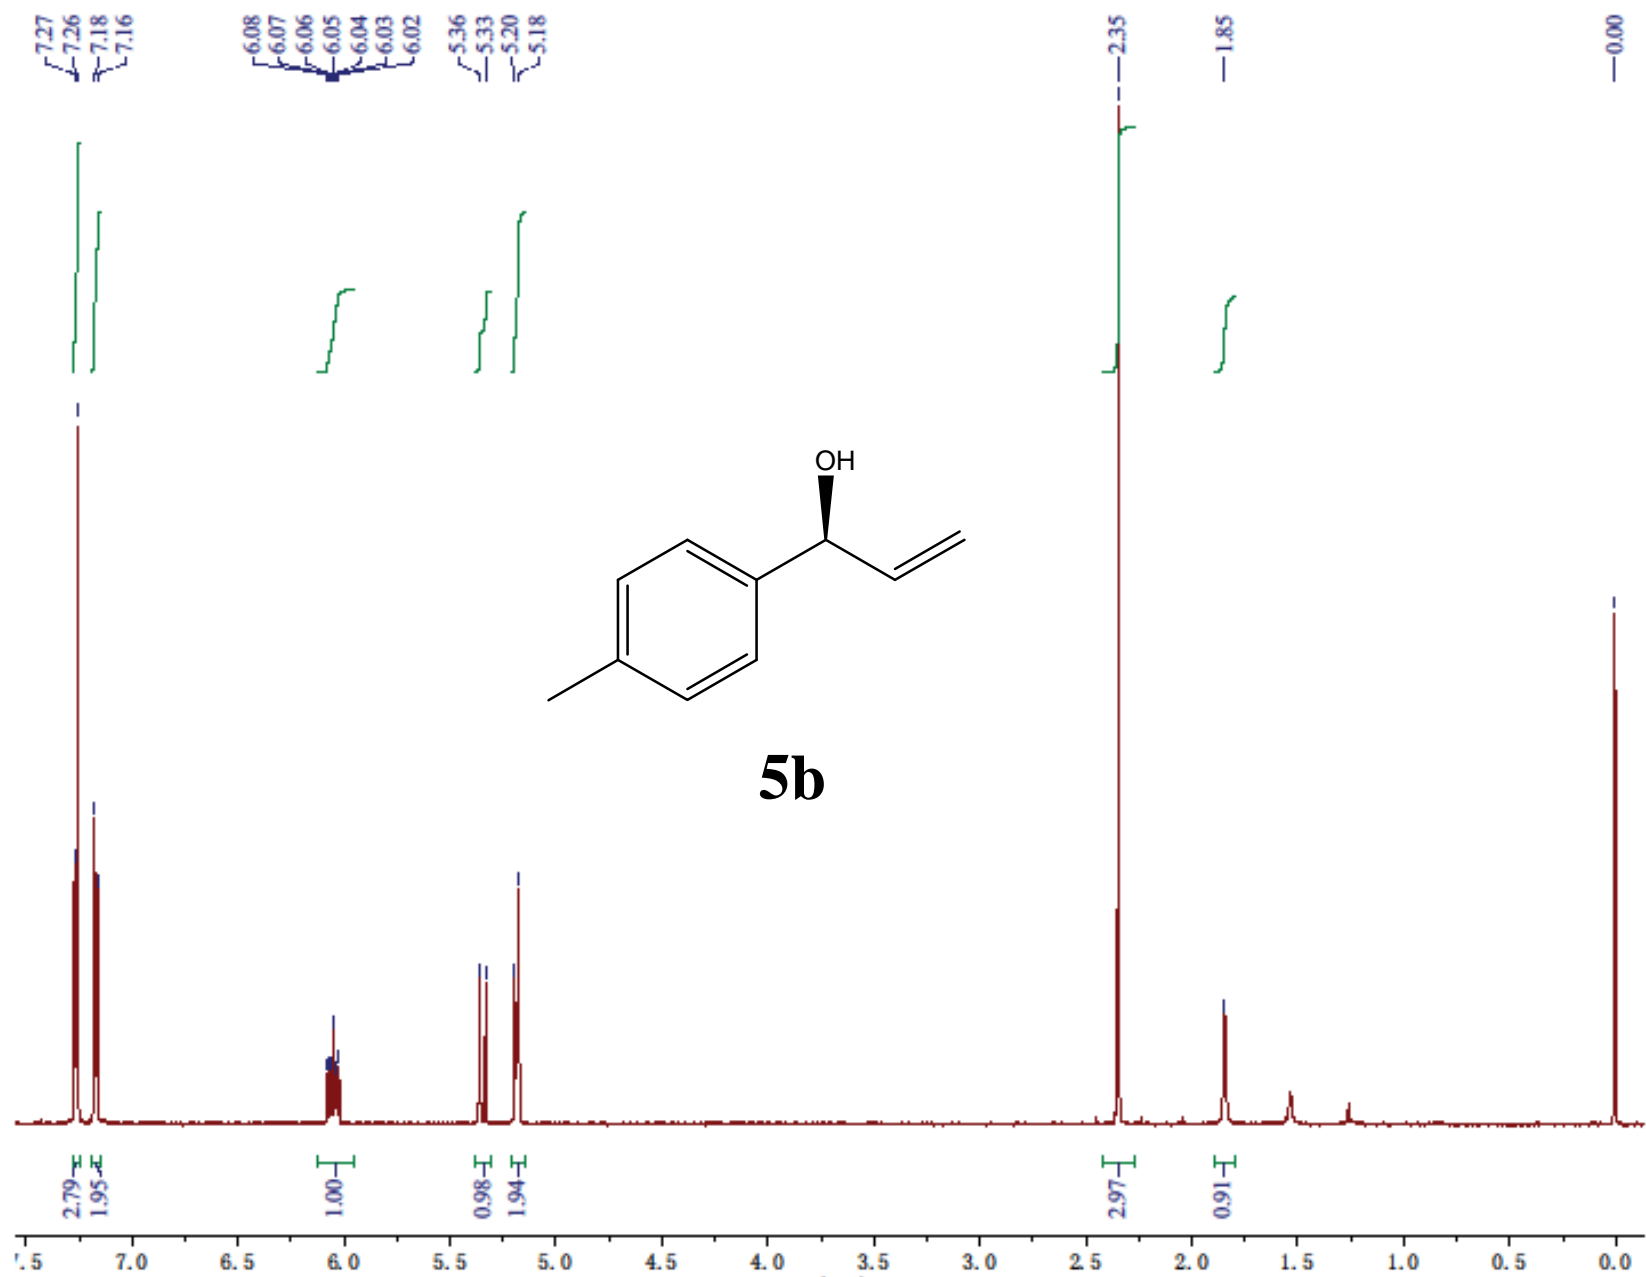



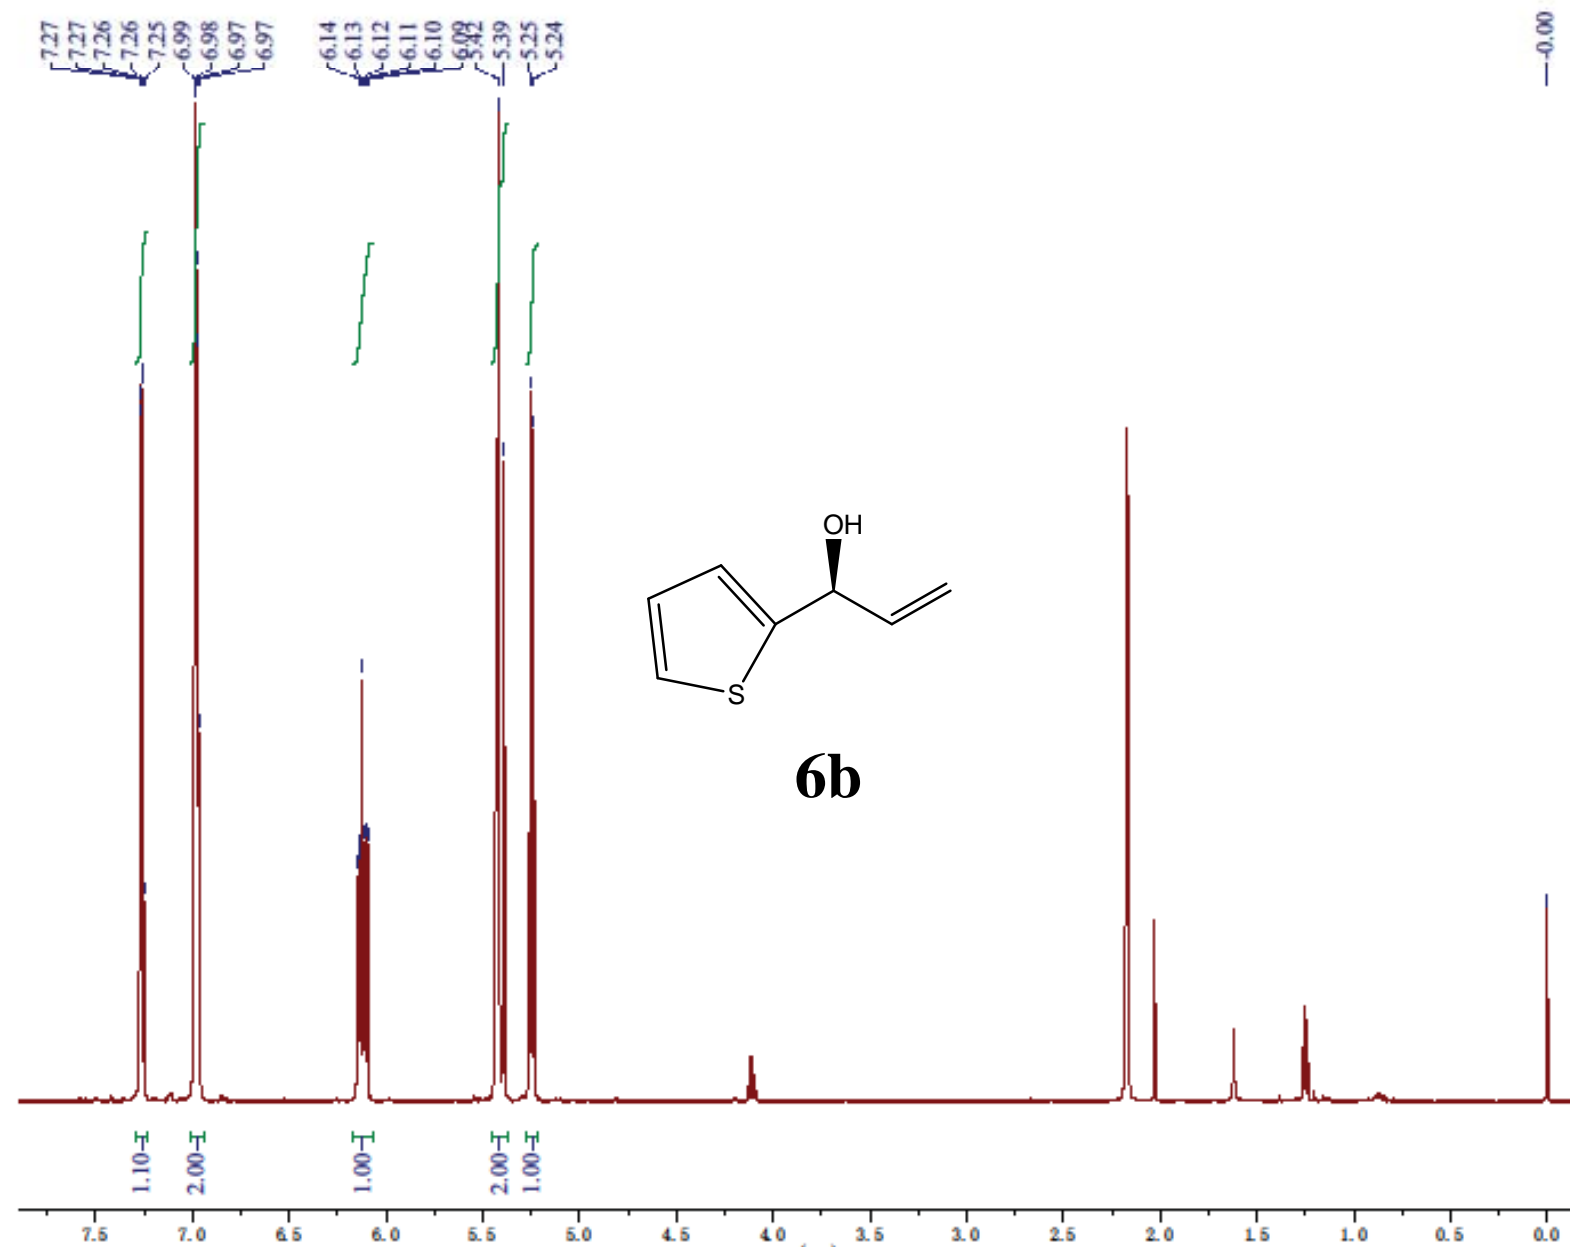

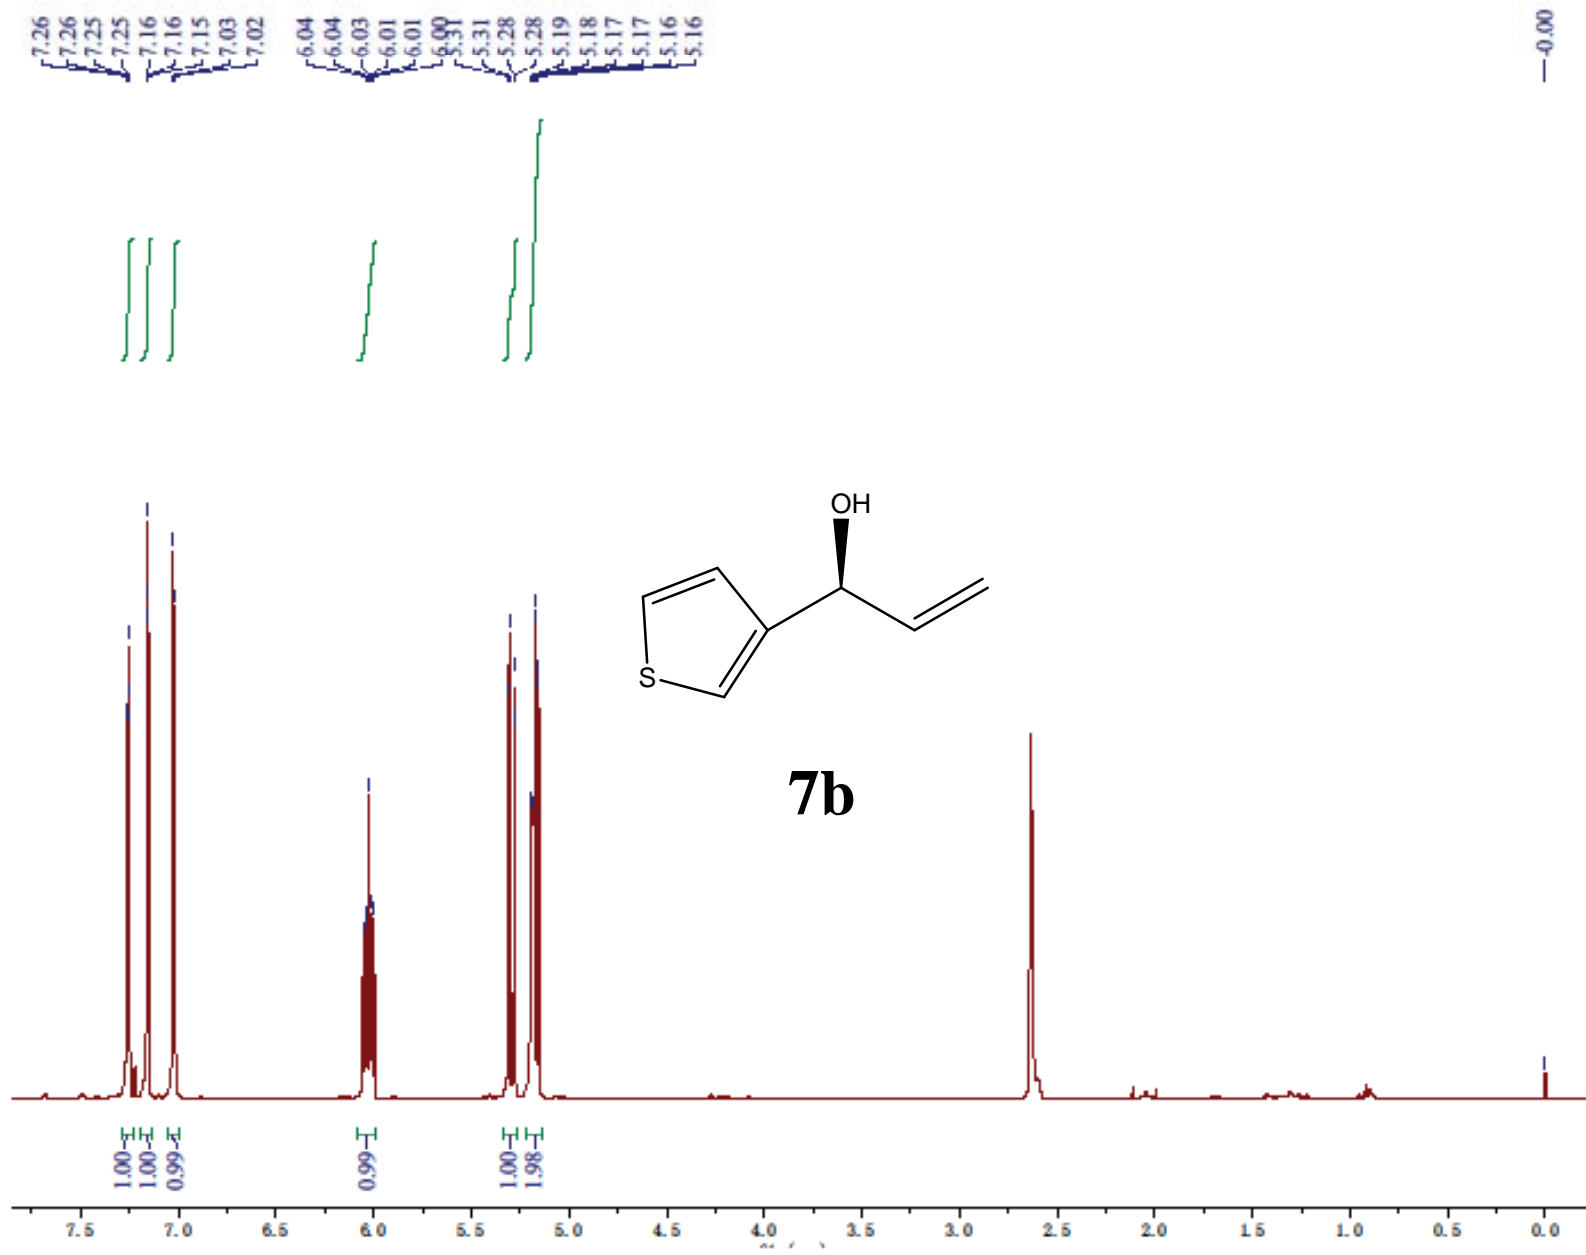

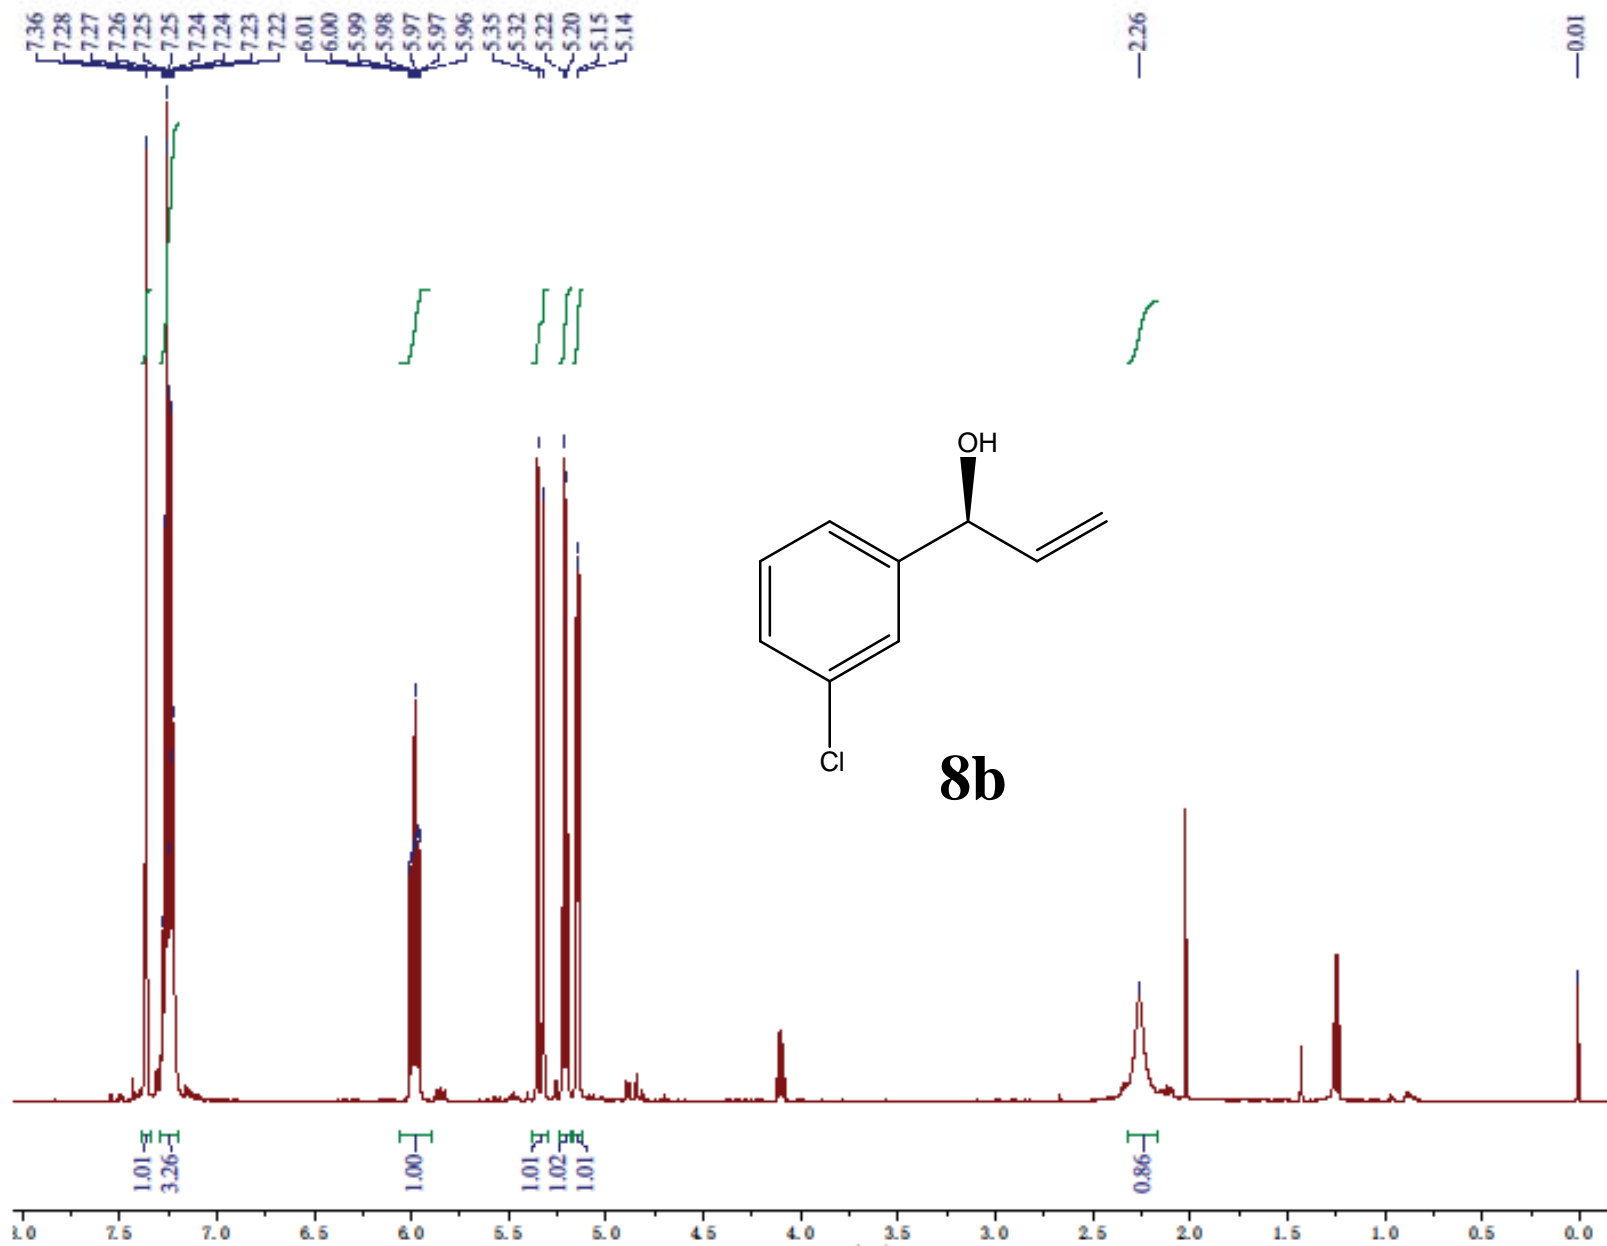

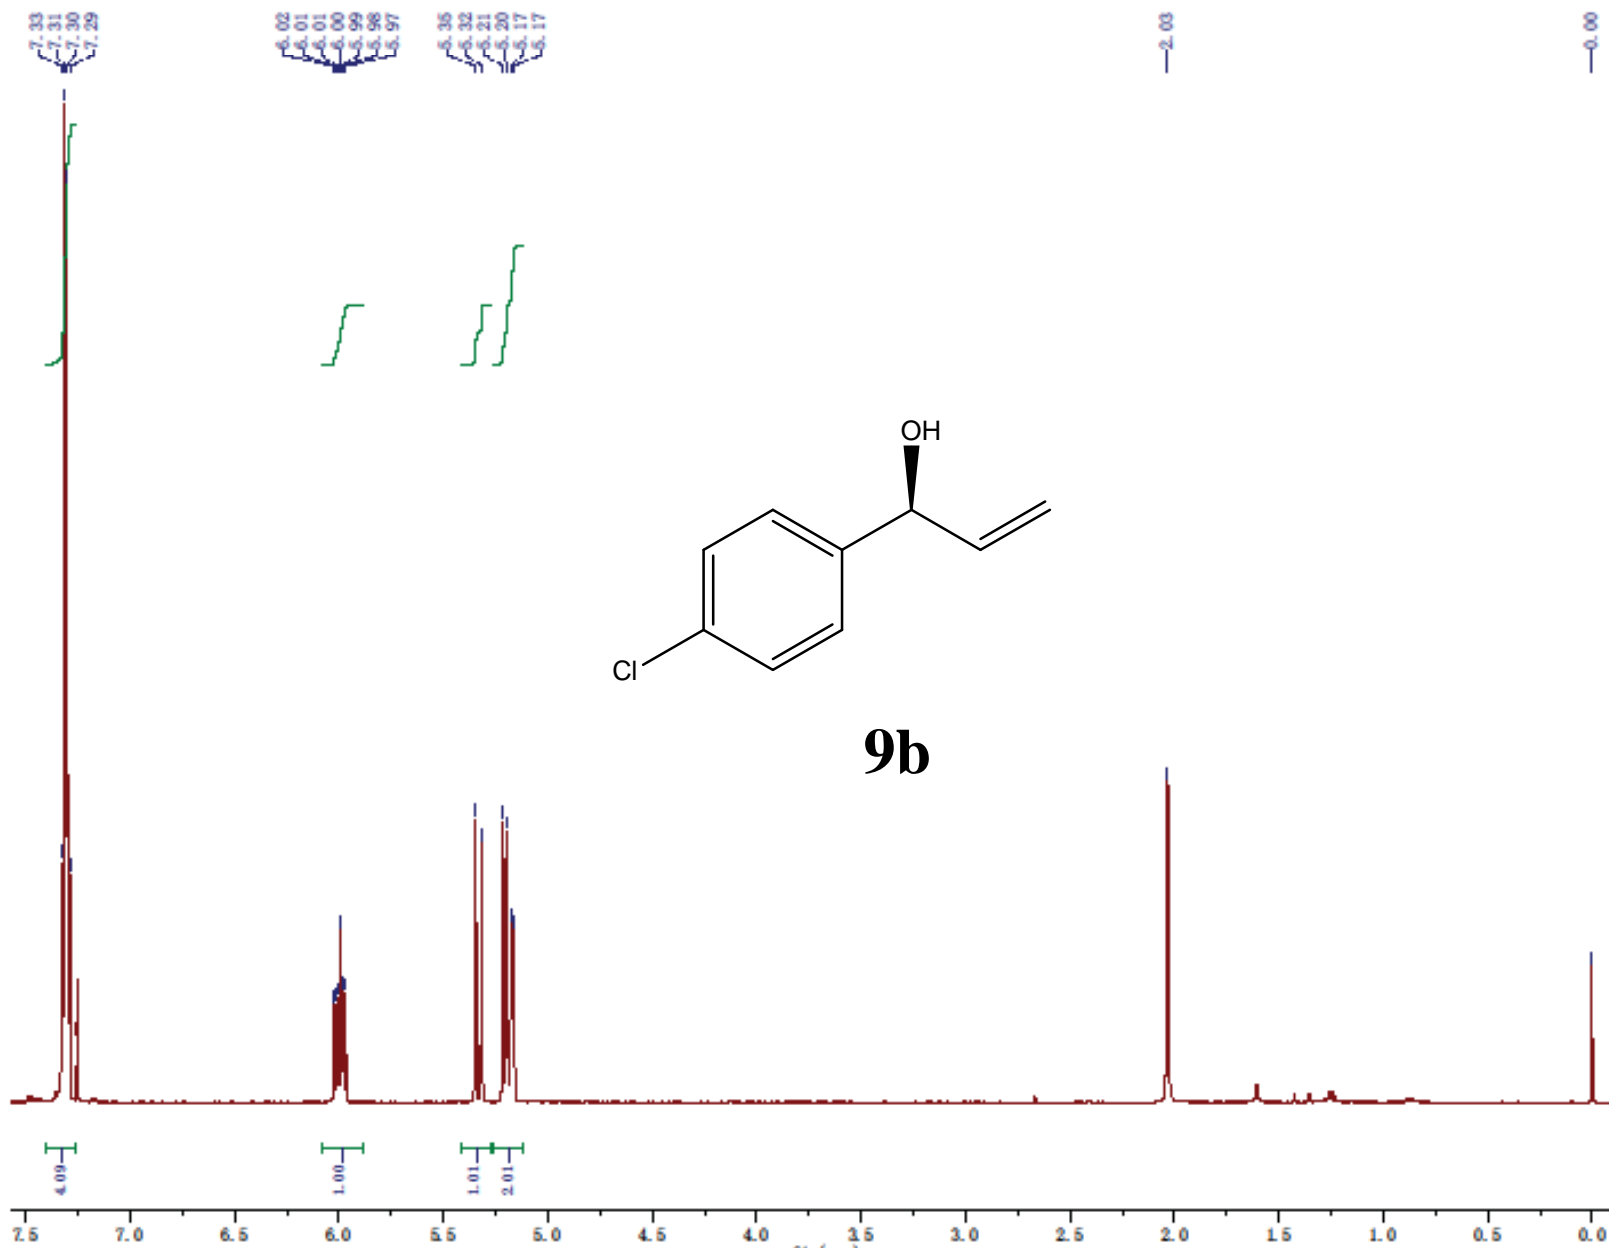

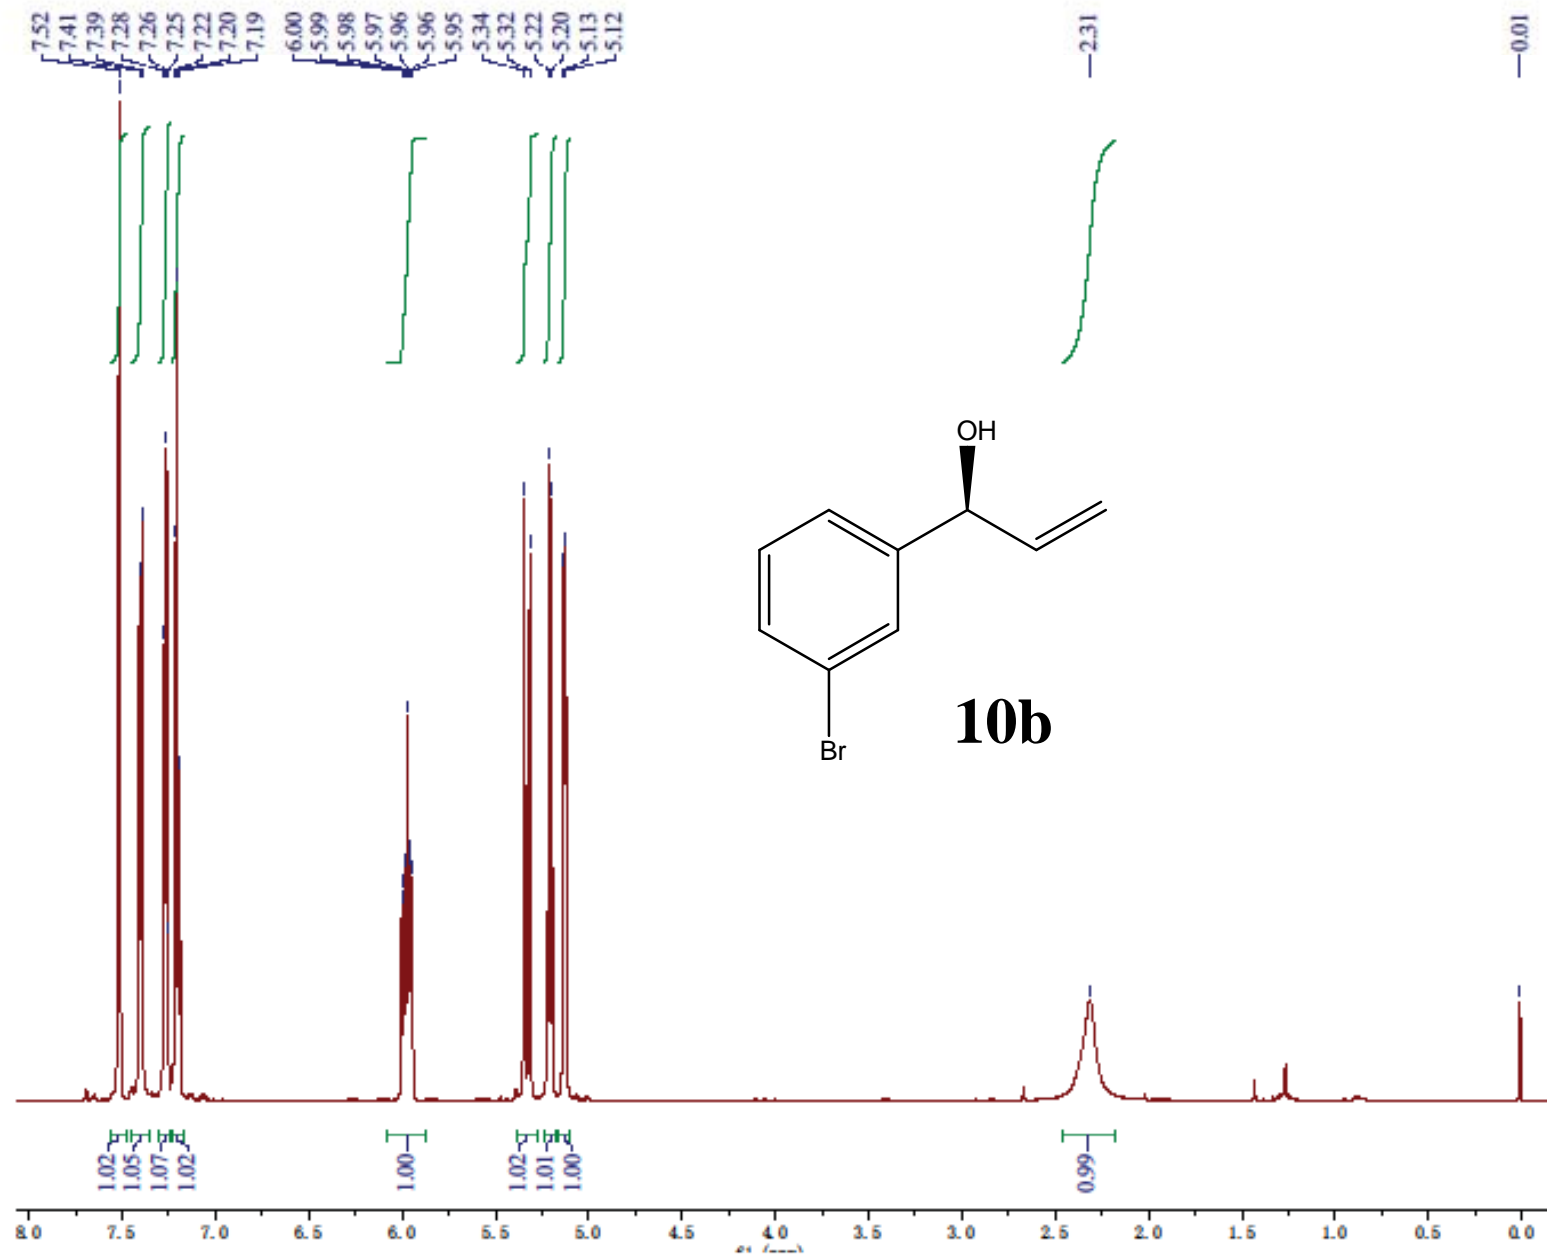

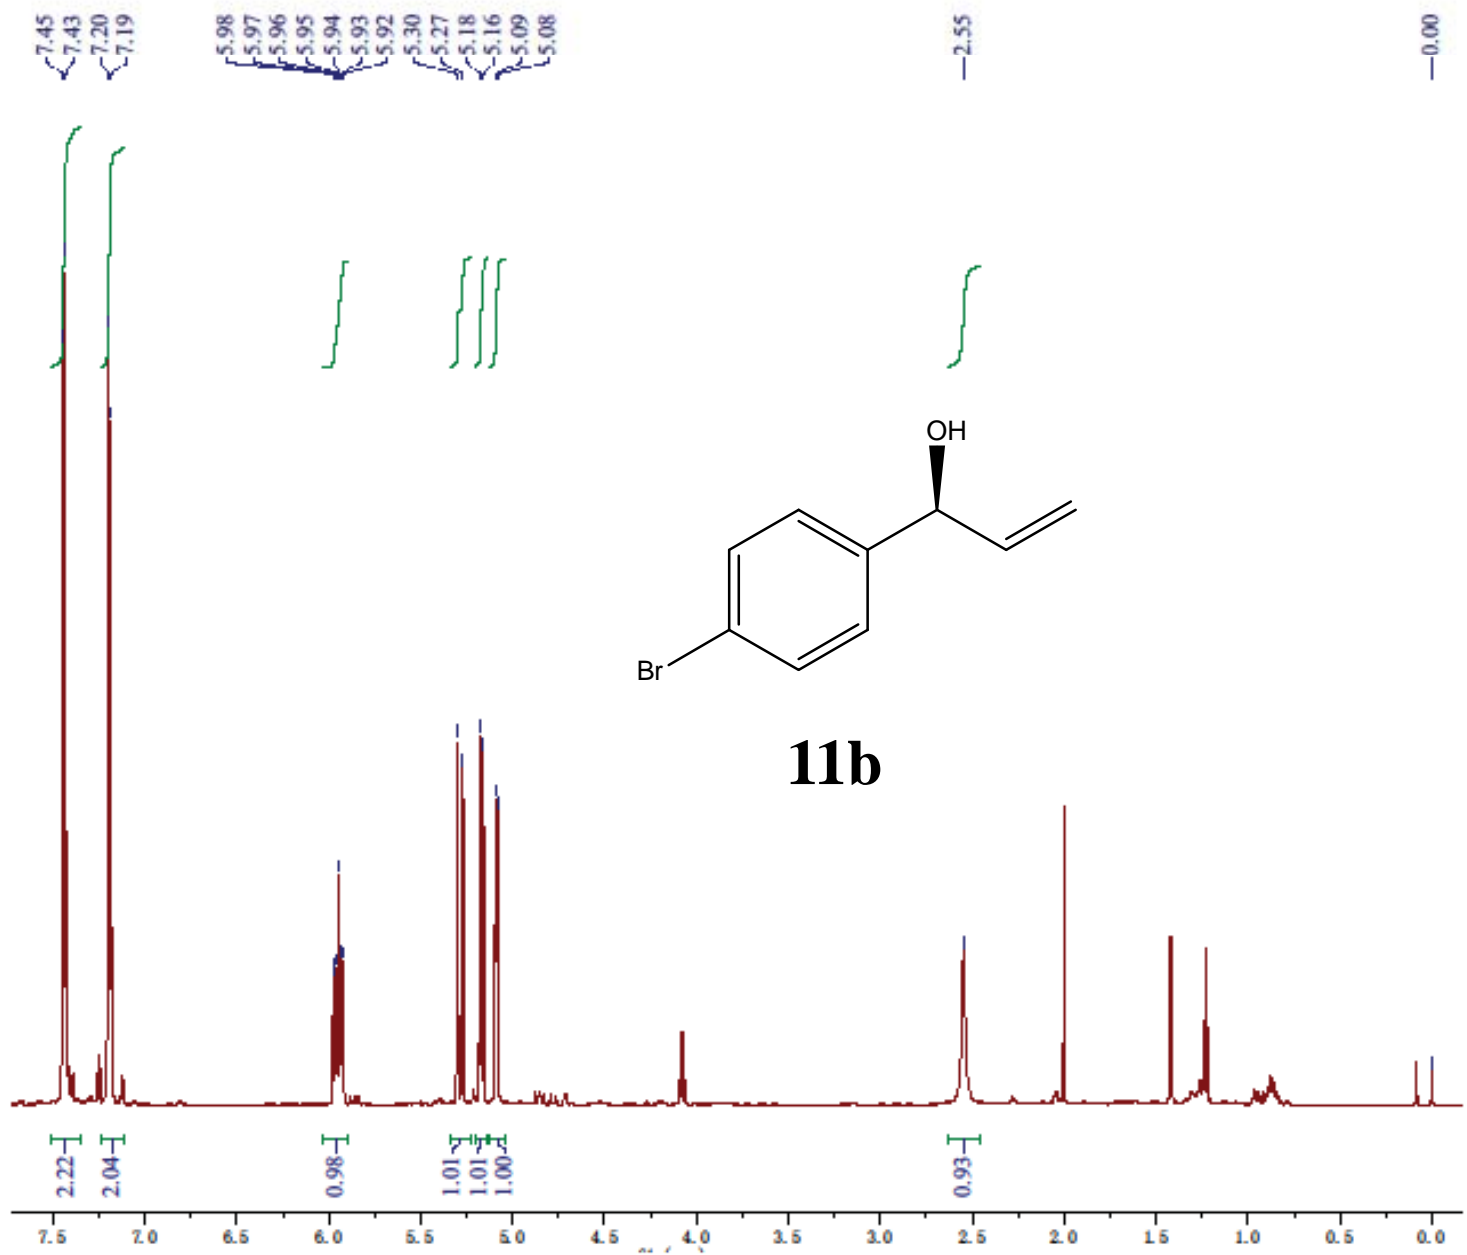

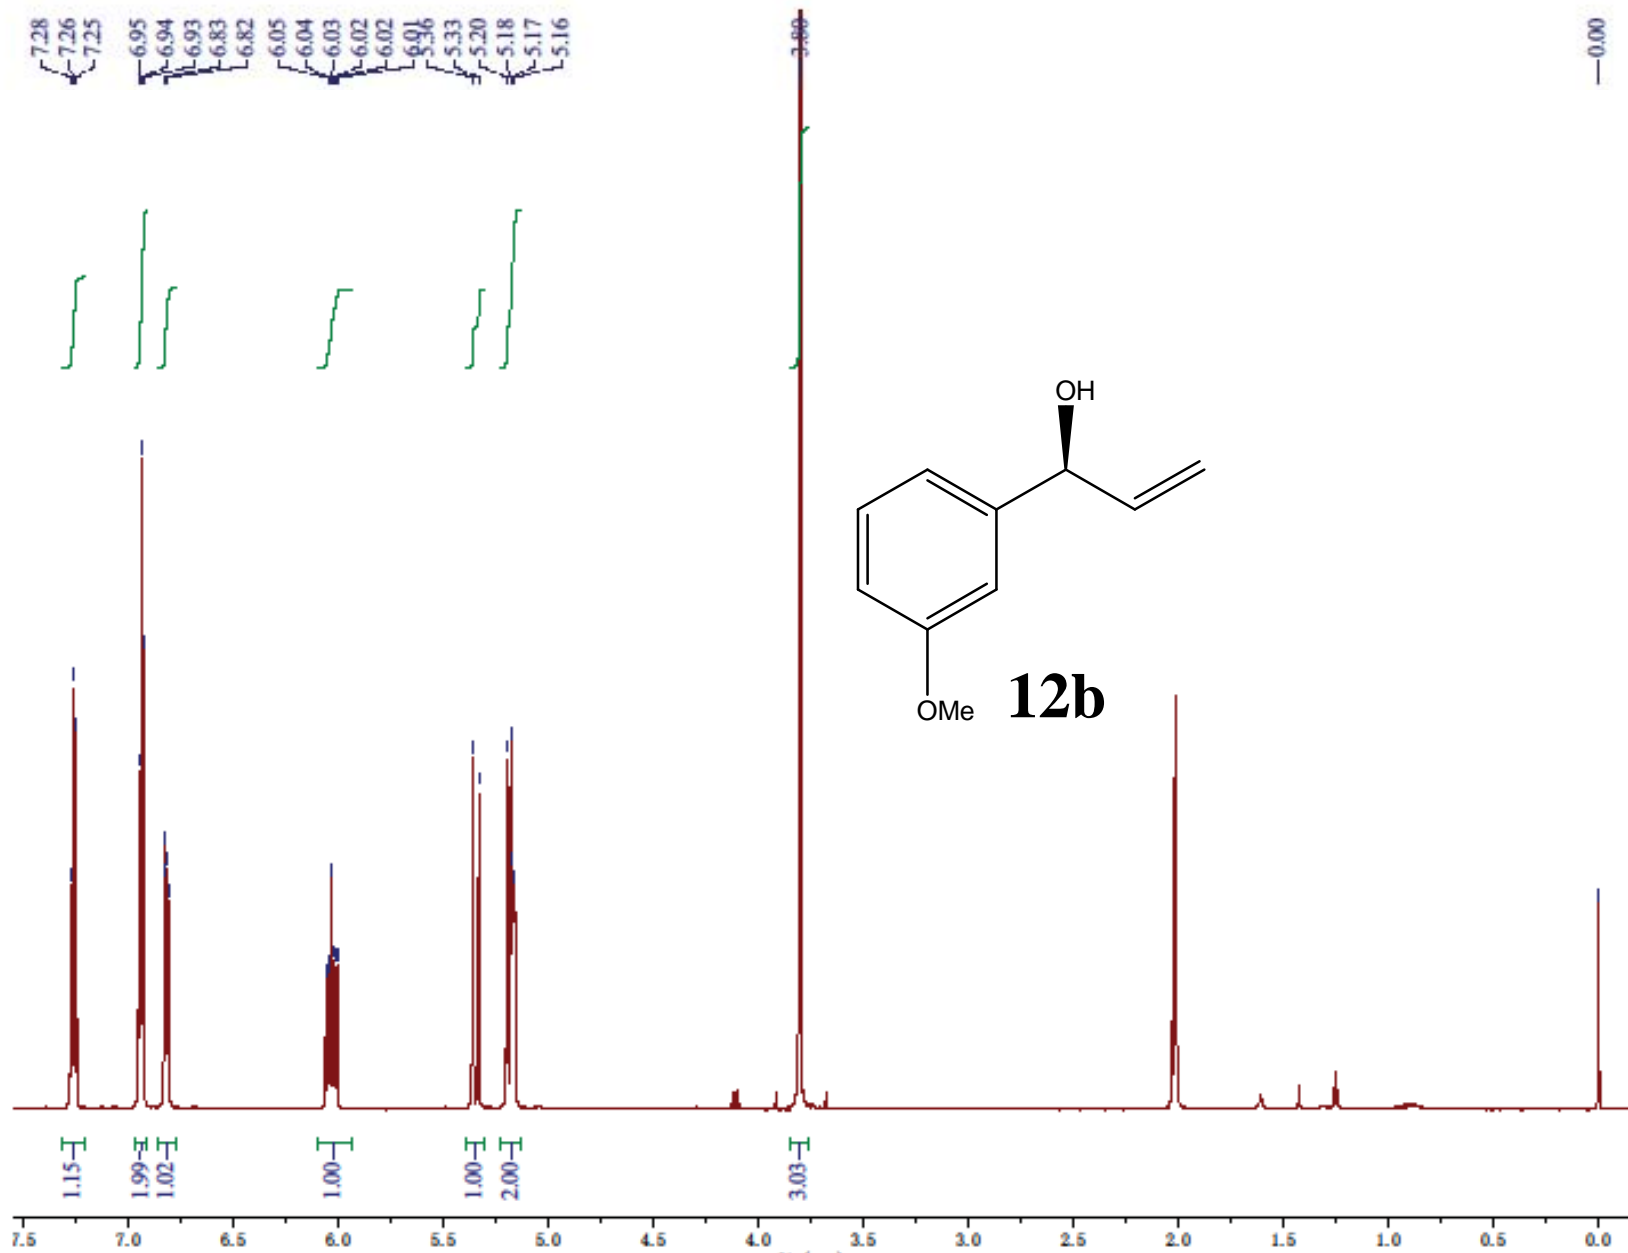

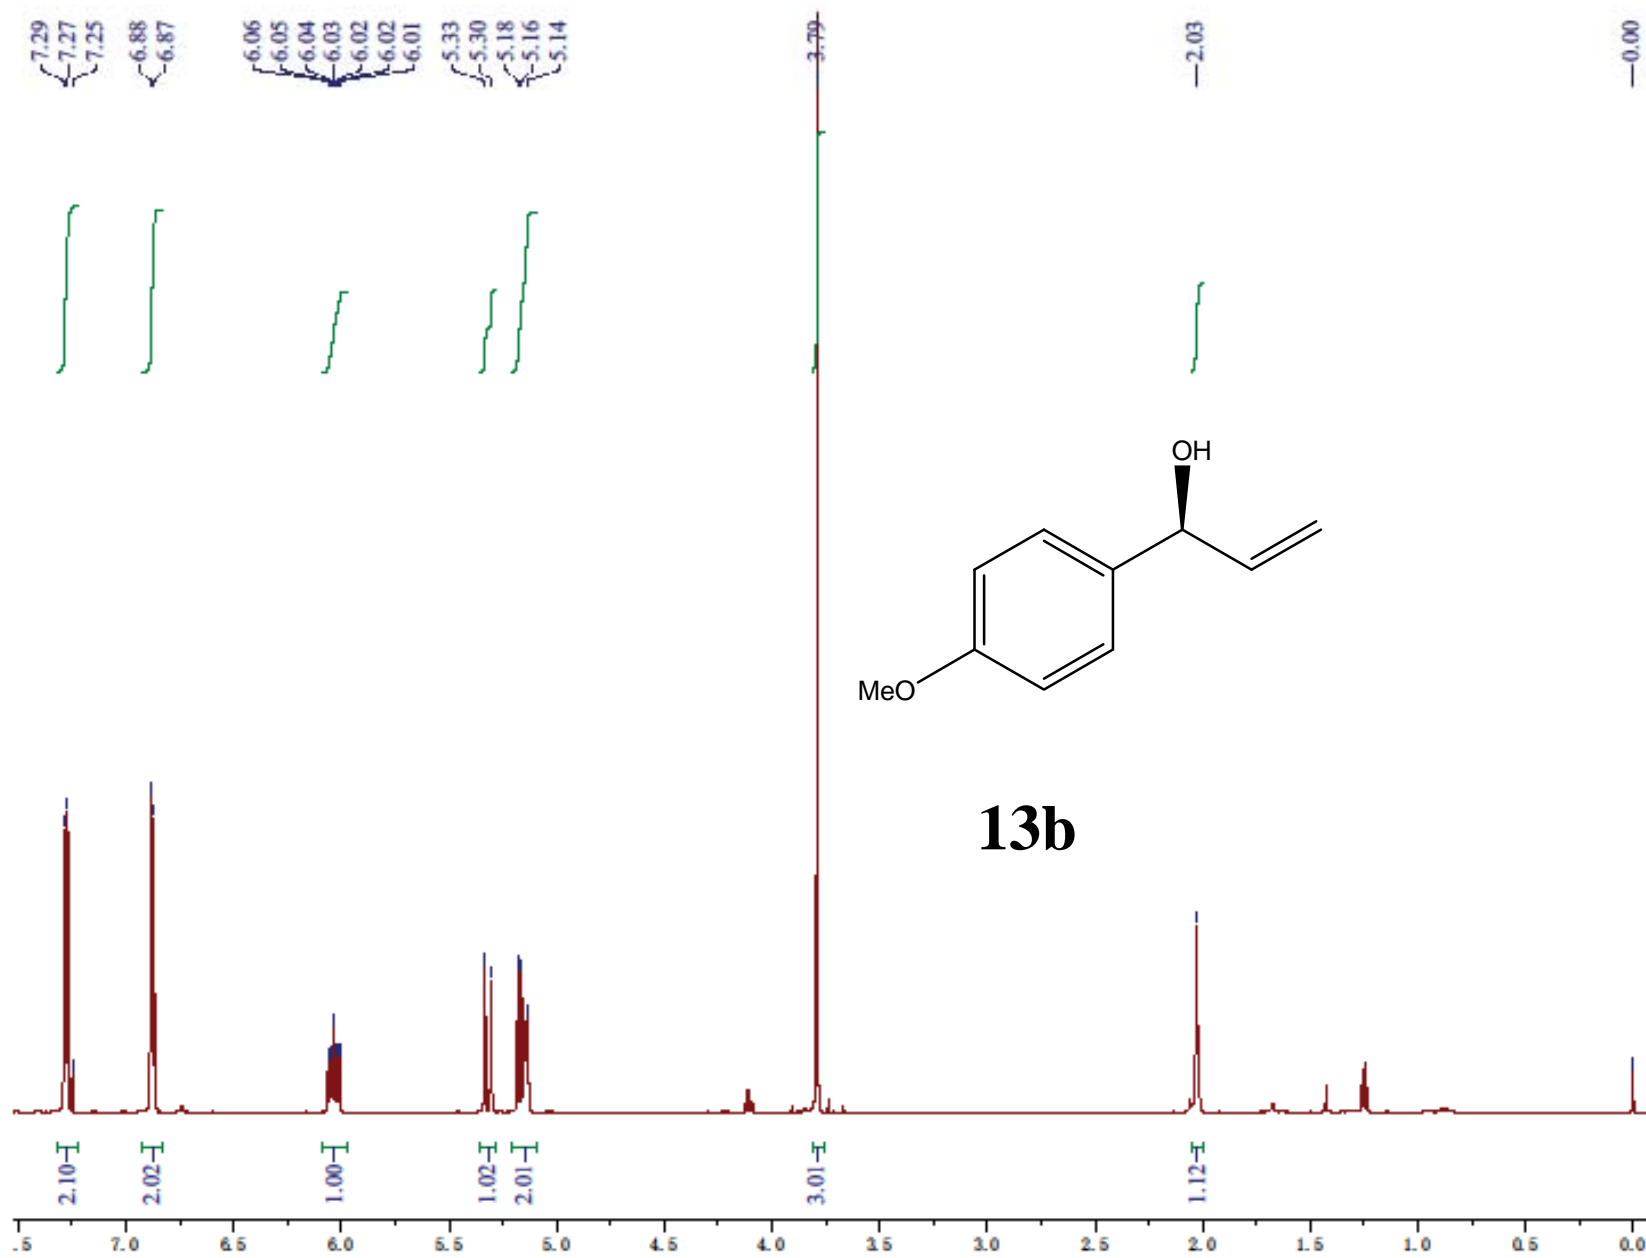



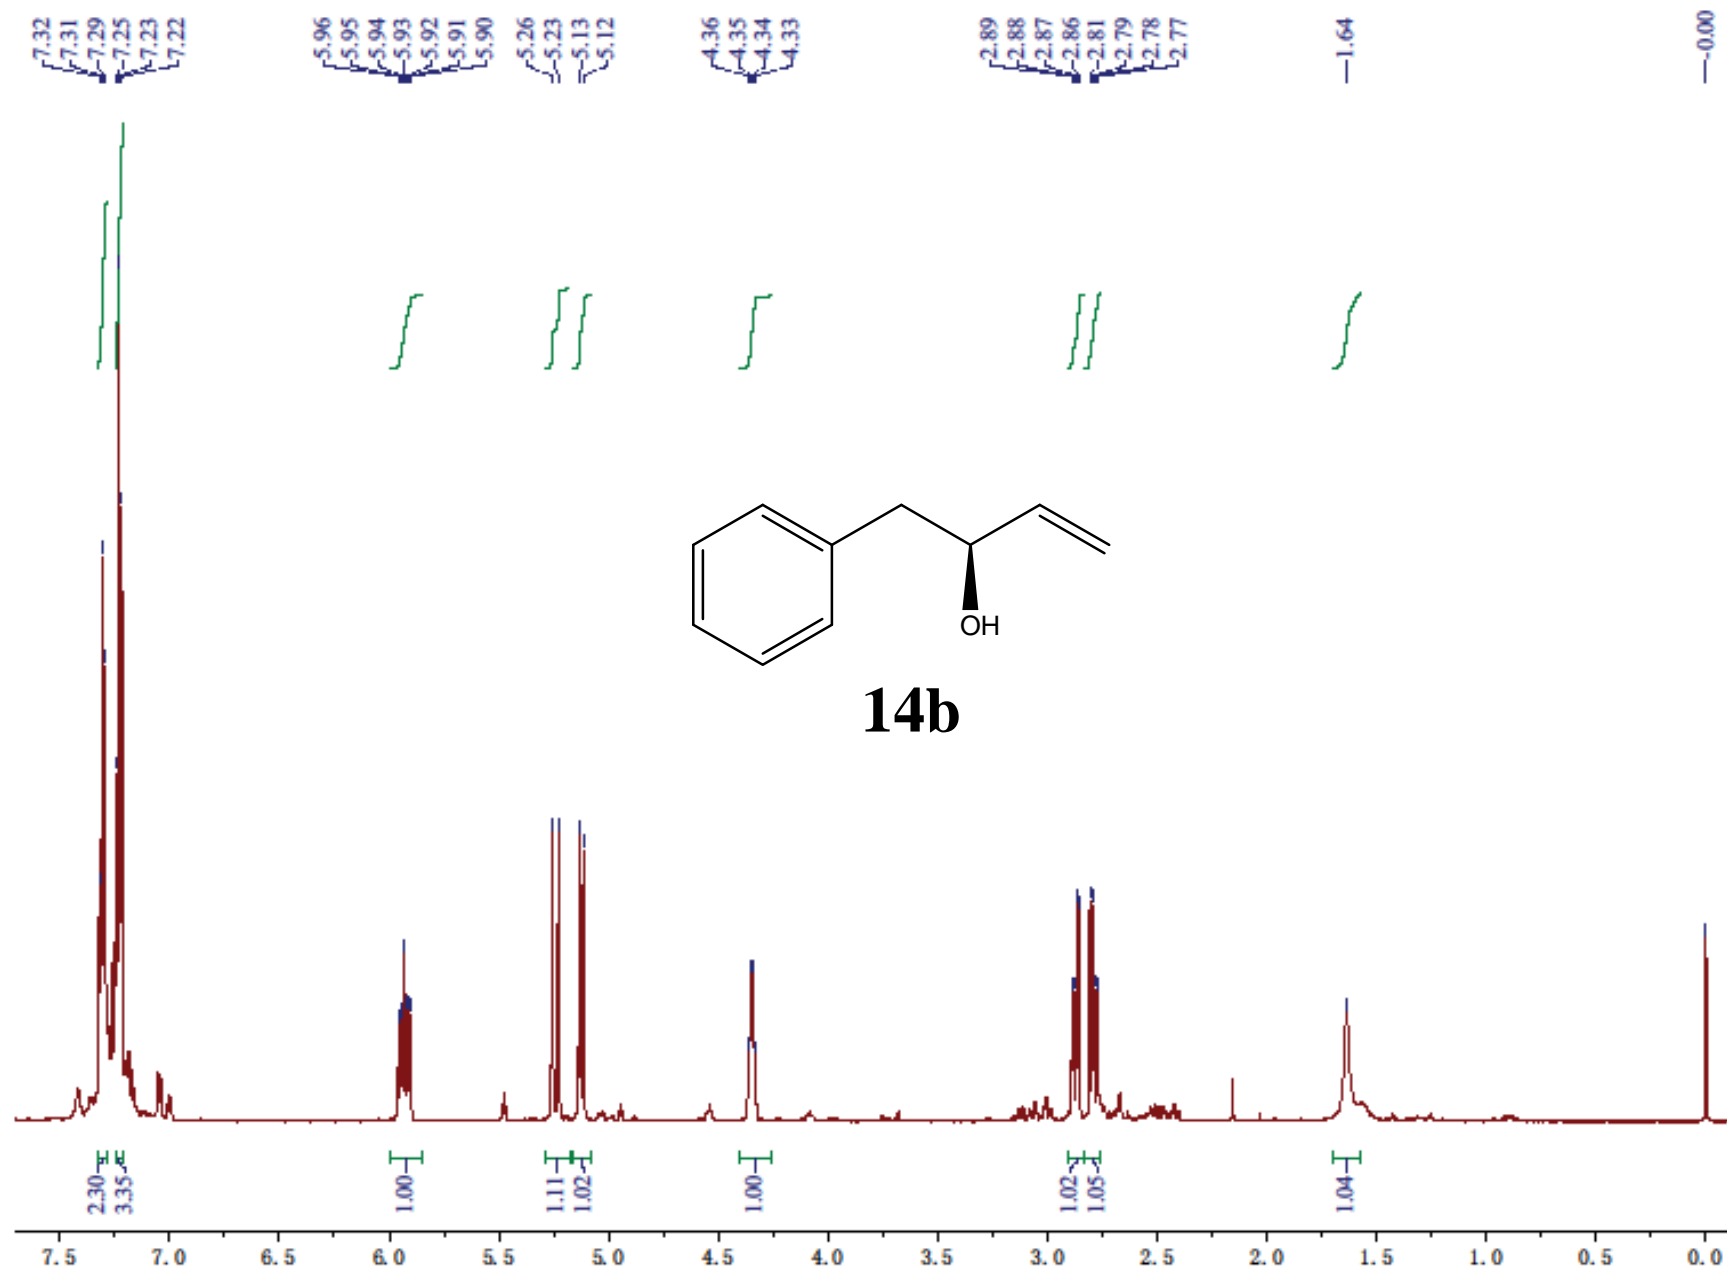

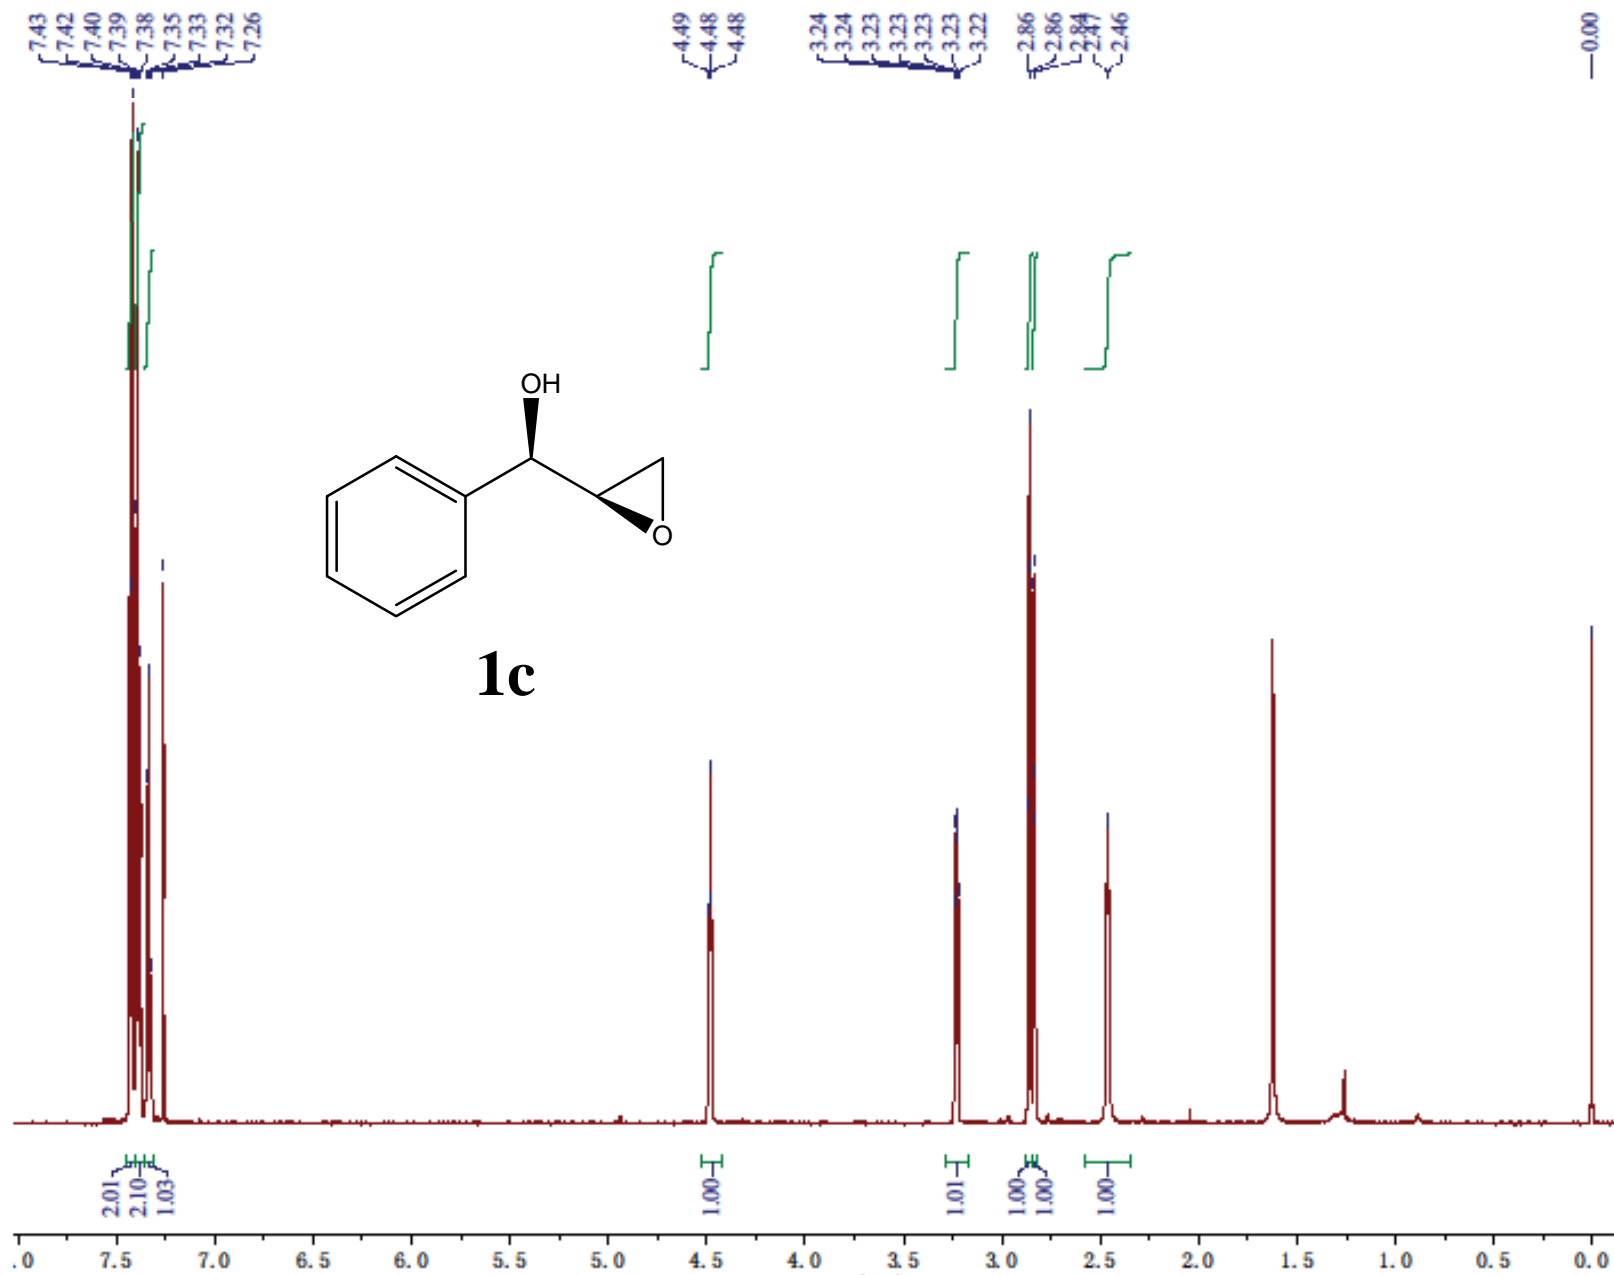

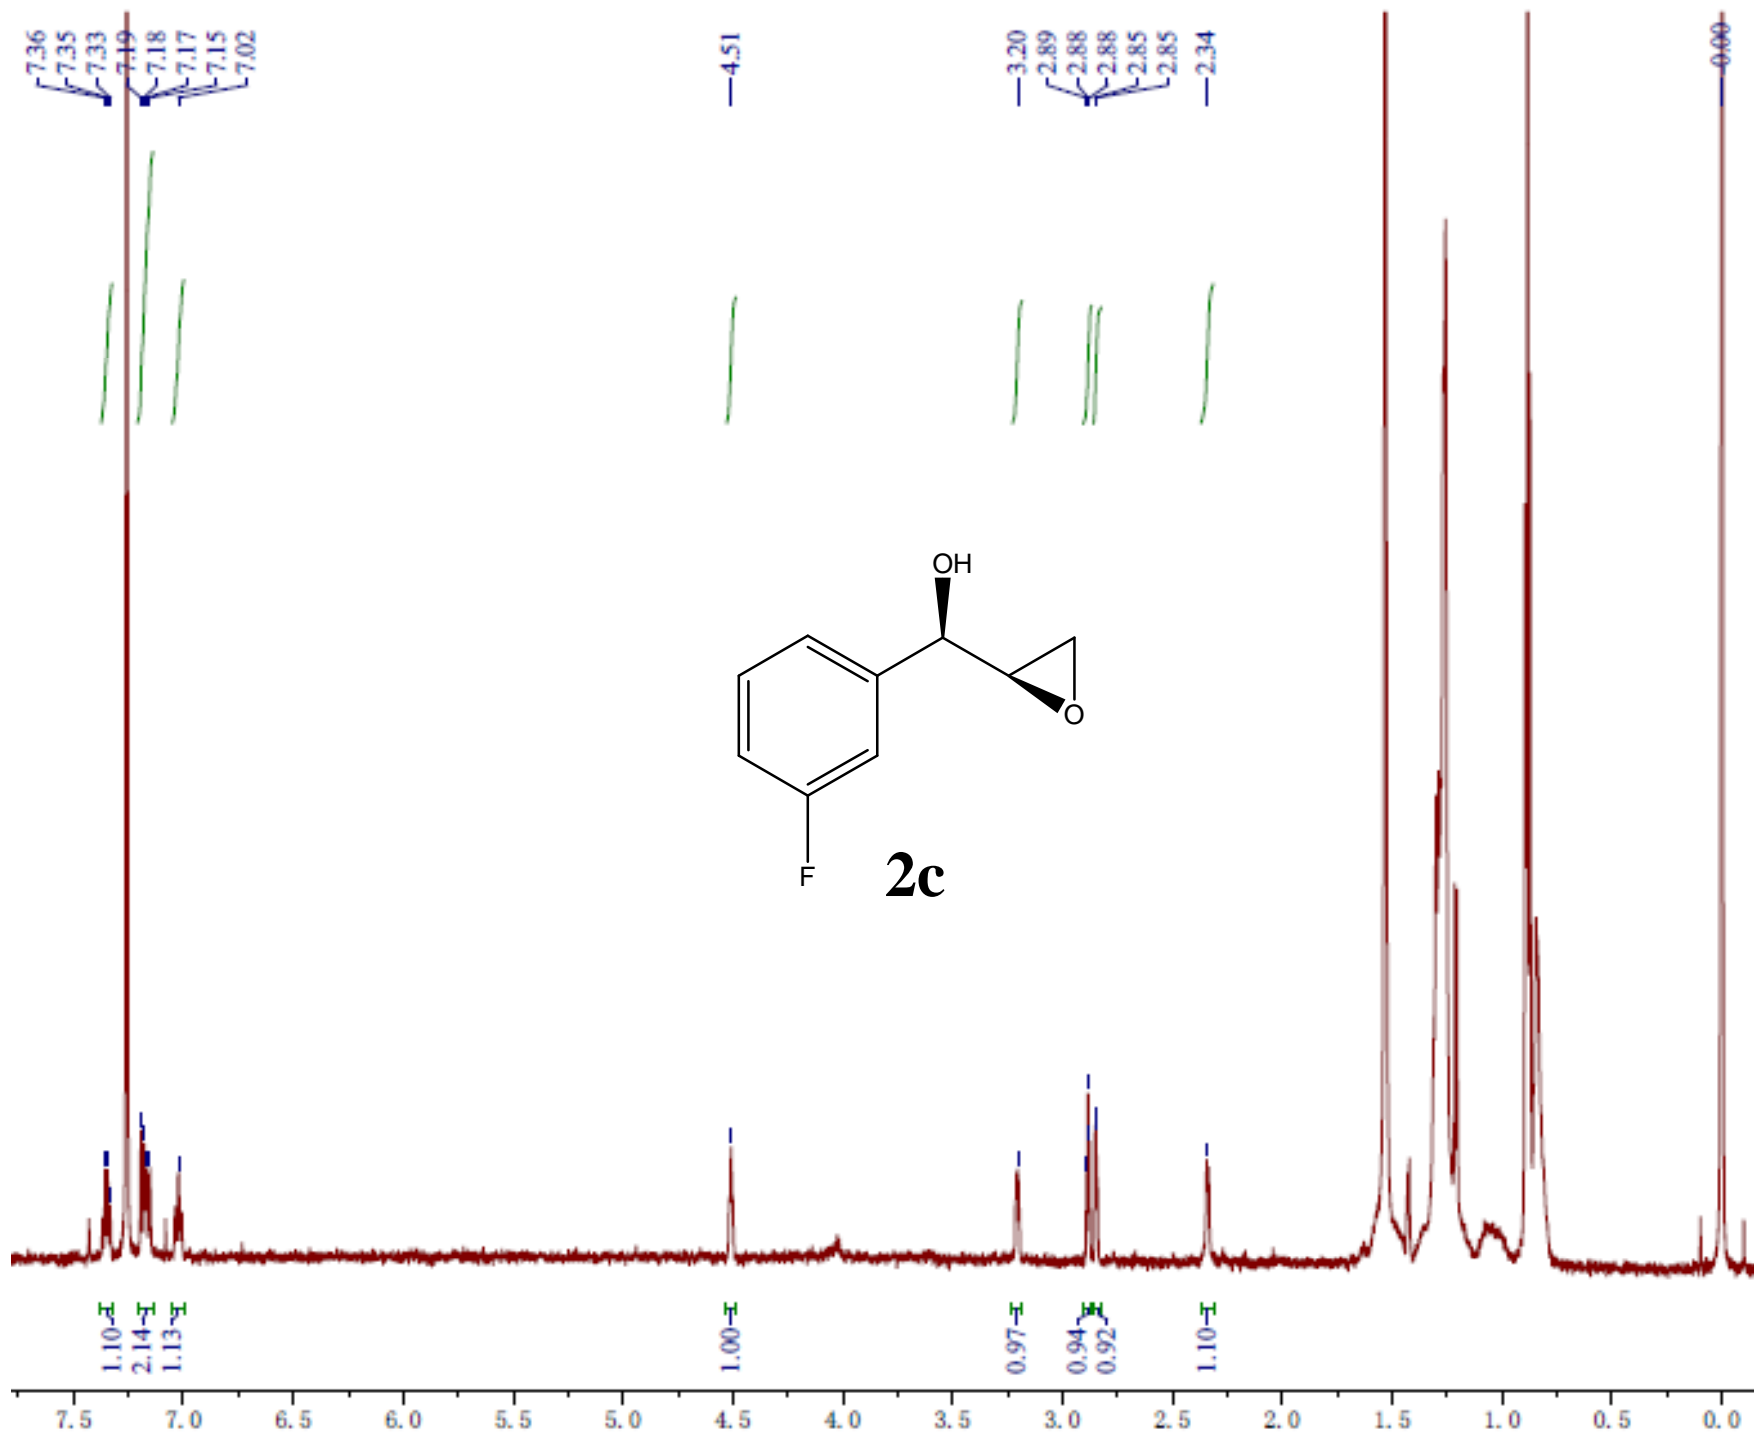

7.41  
7.41  
7.40  
7.39  
7.26  
7.09  
7.07  
7.06

4.49  
4.48

3.21  
3.20  
3.20  
3.20  
3.20  
3.19

2.87  
2.86  
2.83  
2.83  
2.80

0.00

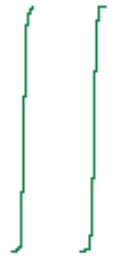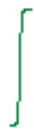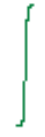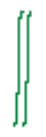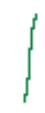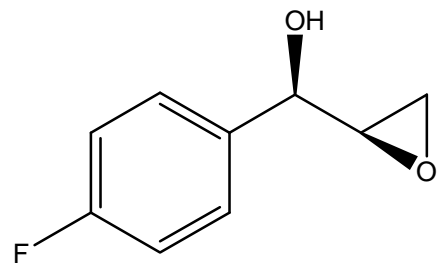

**3c**

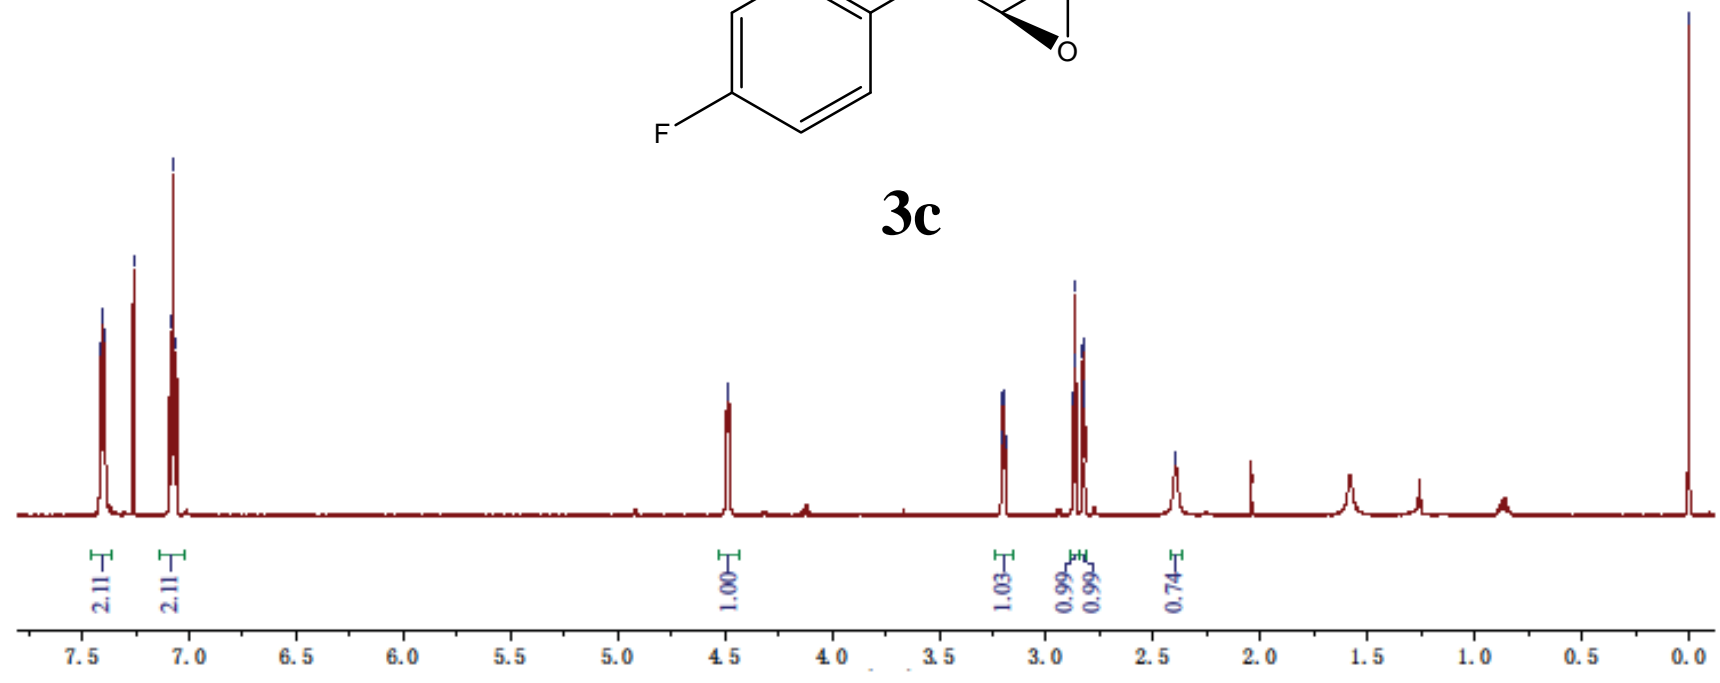

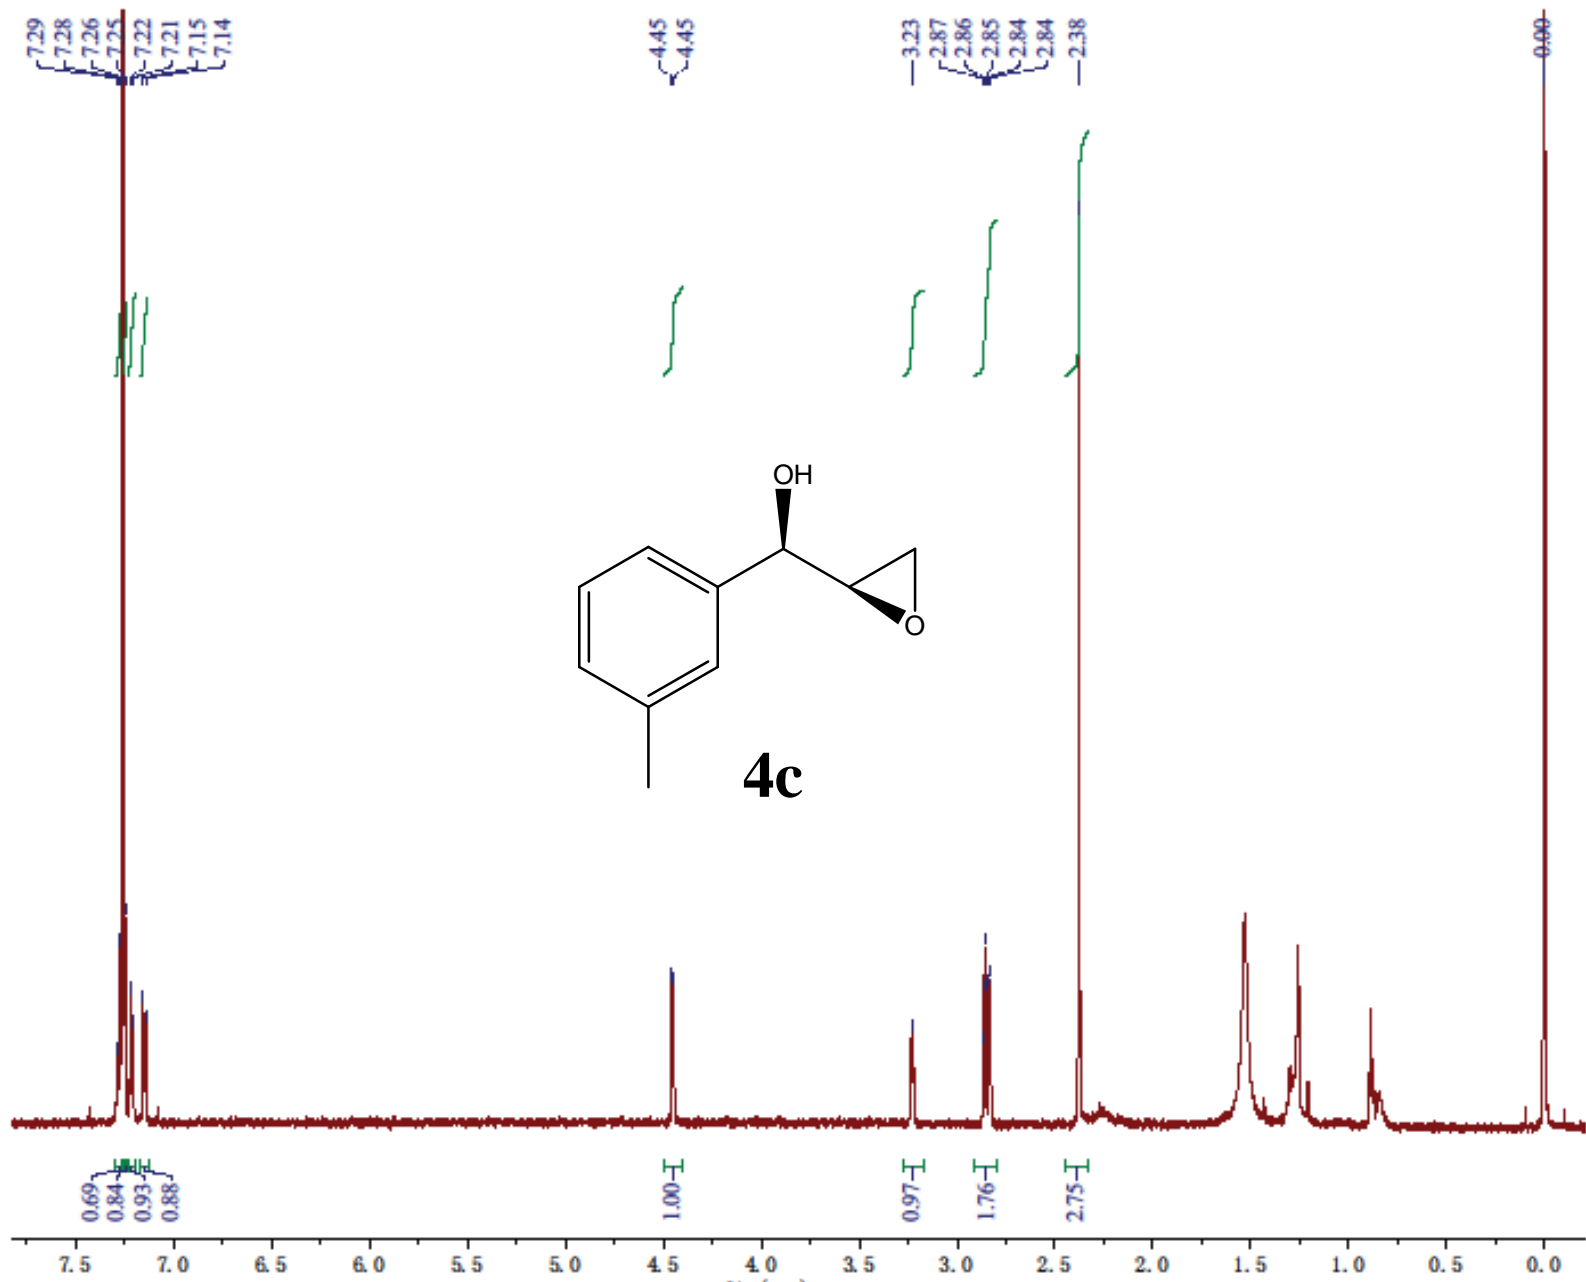

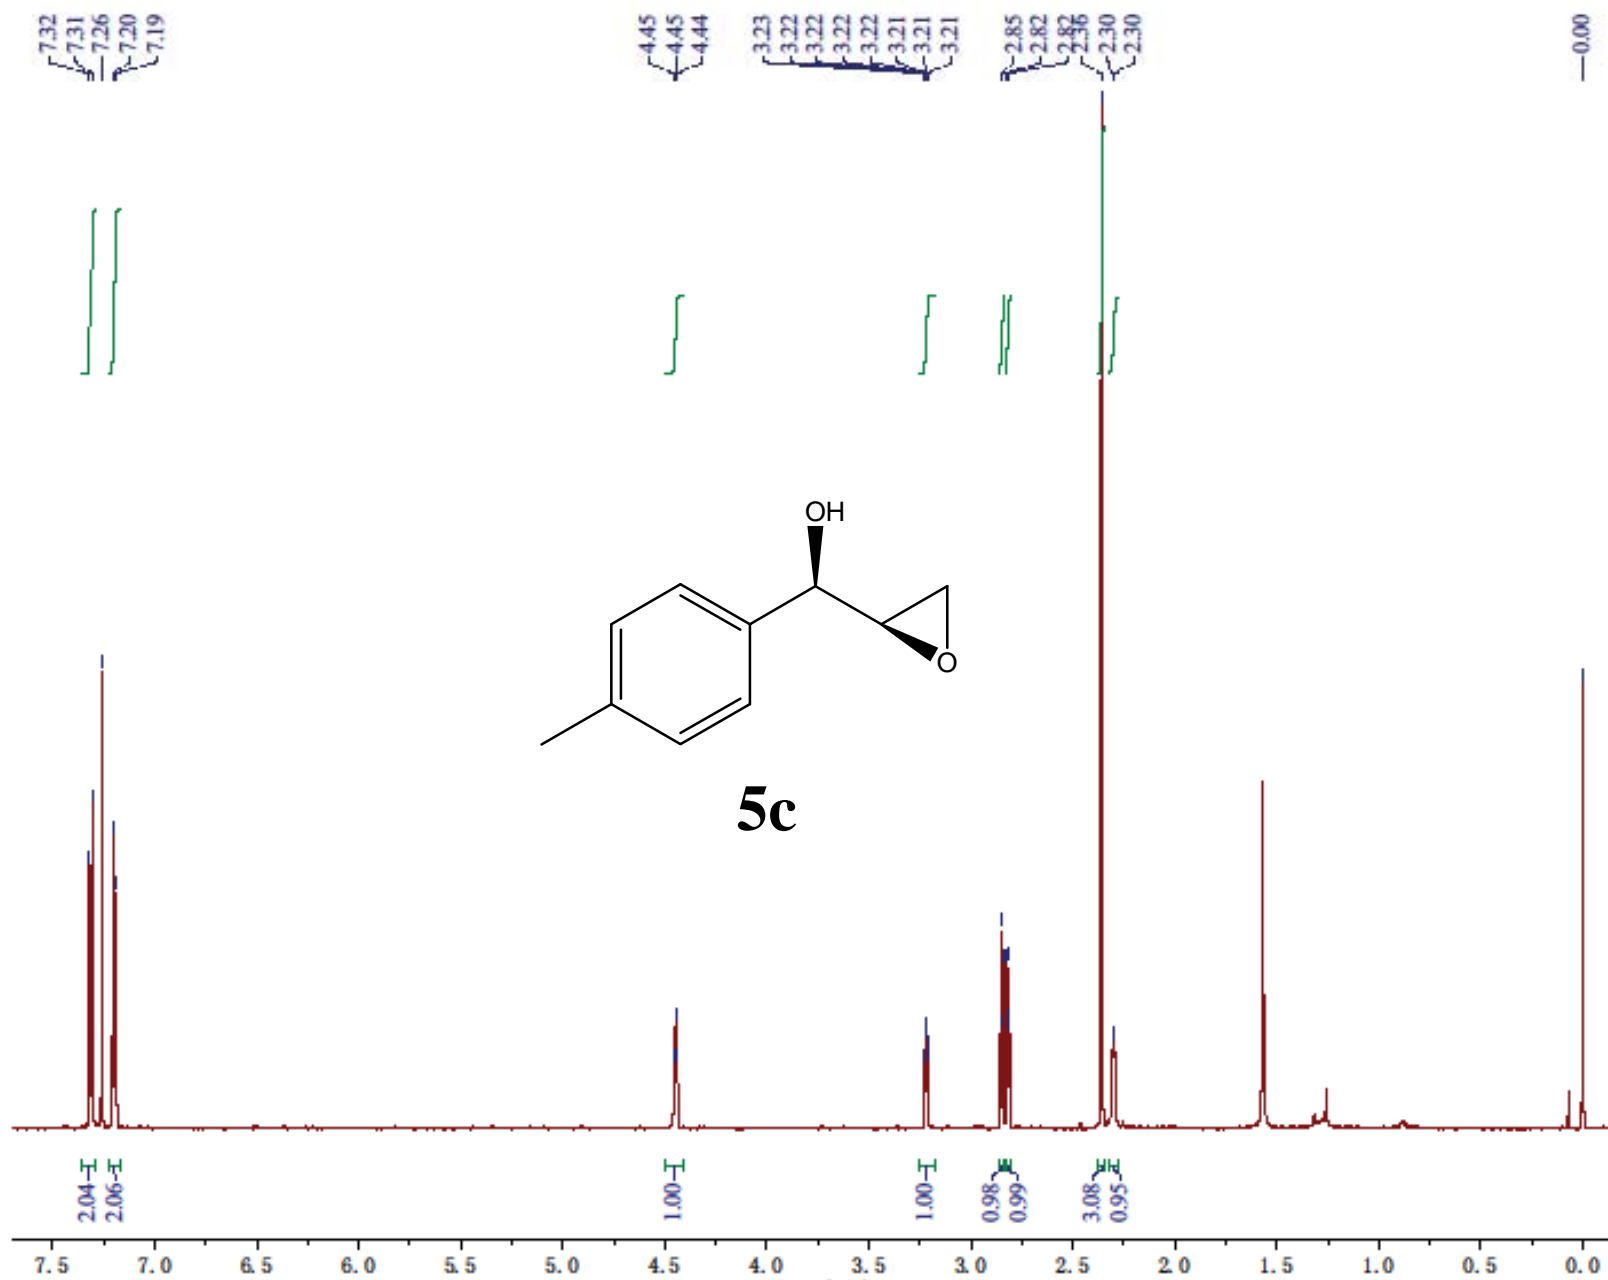

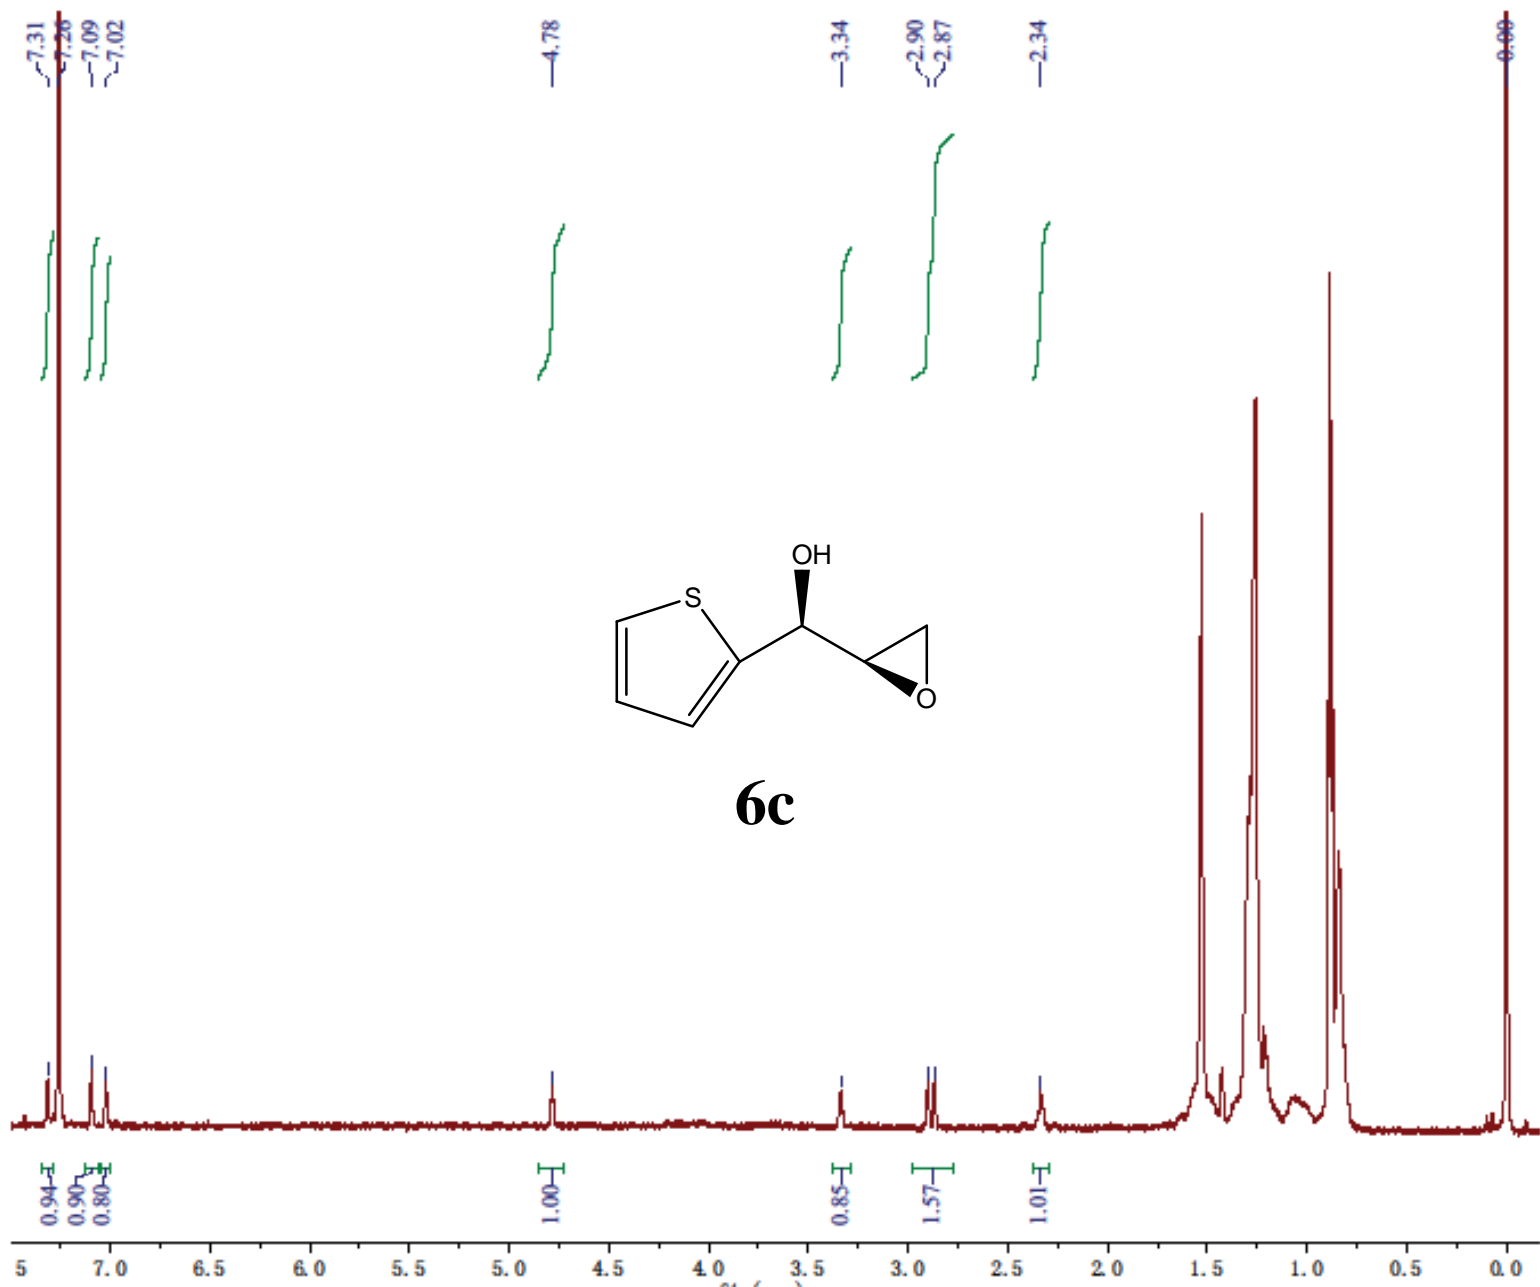

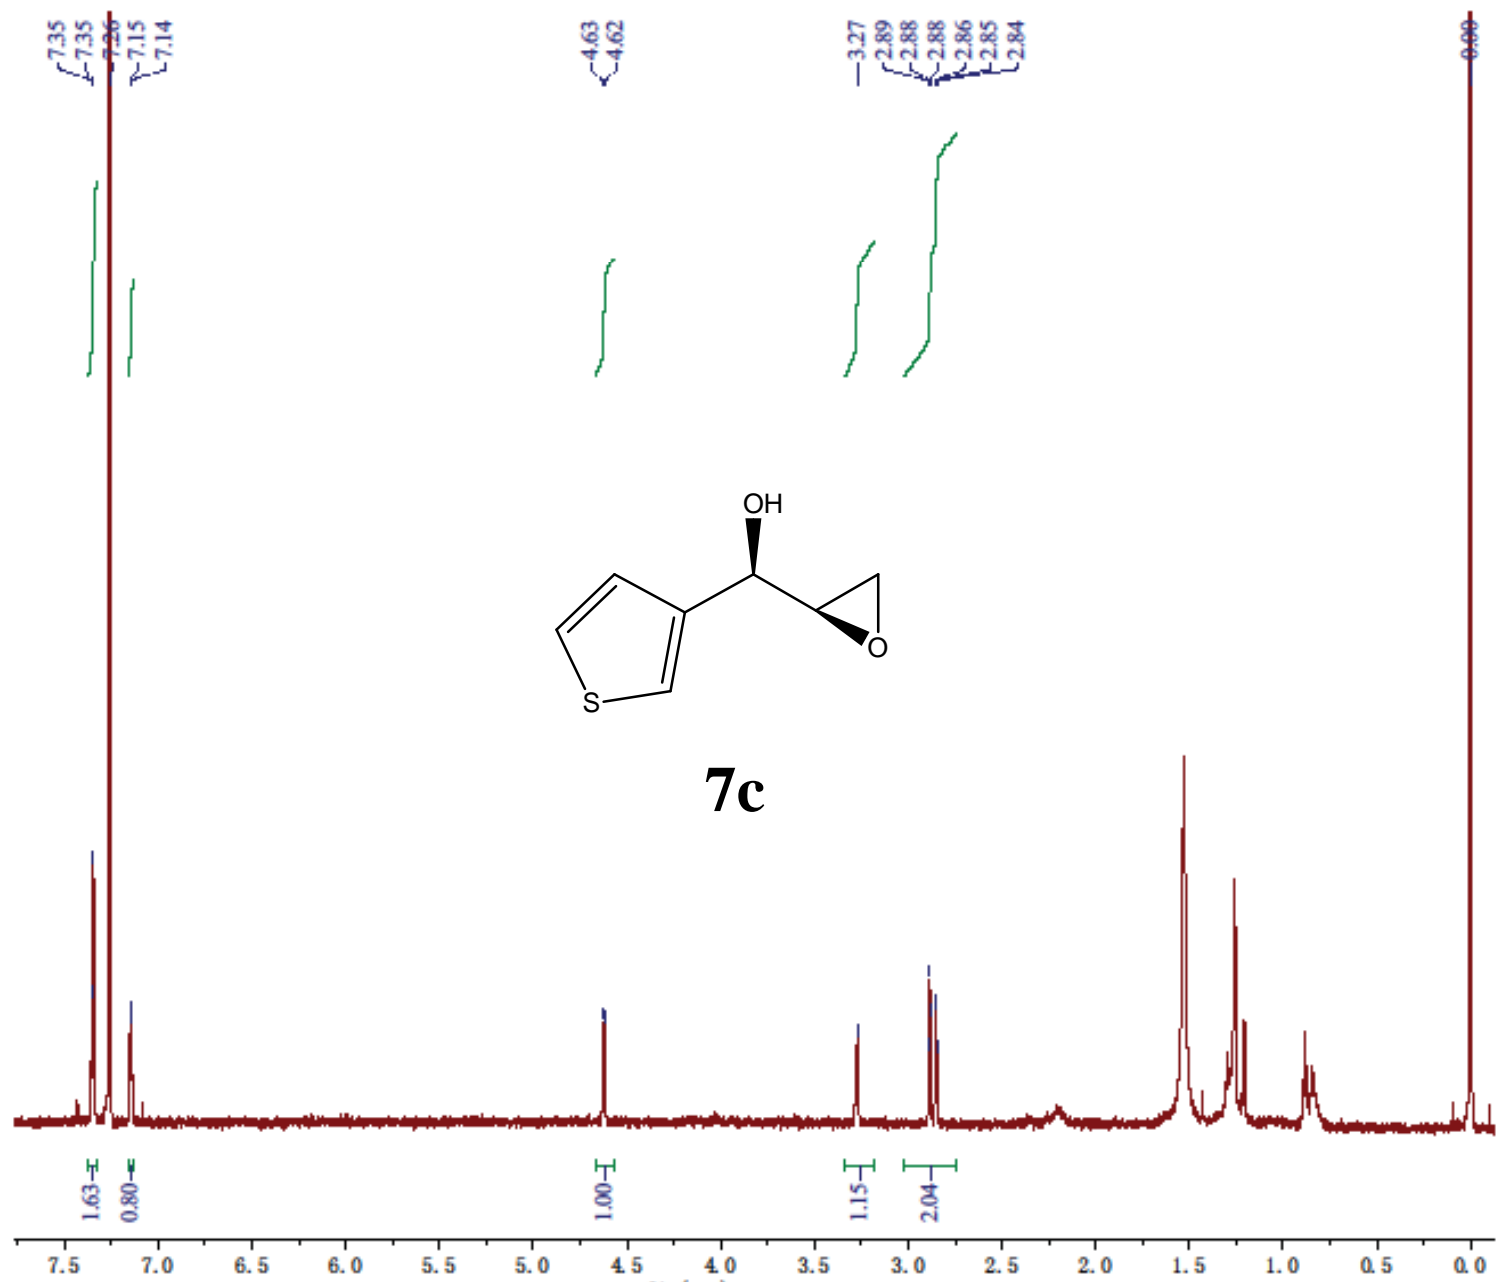



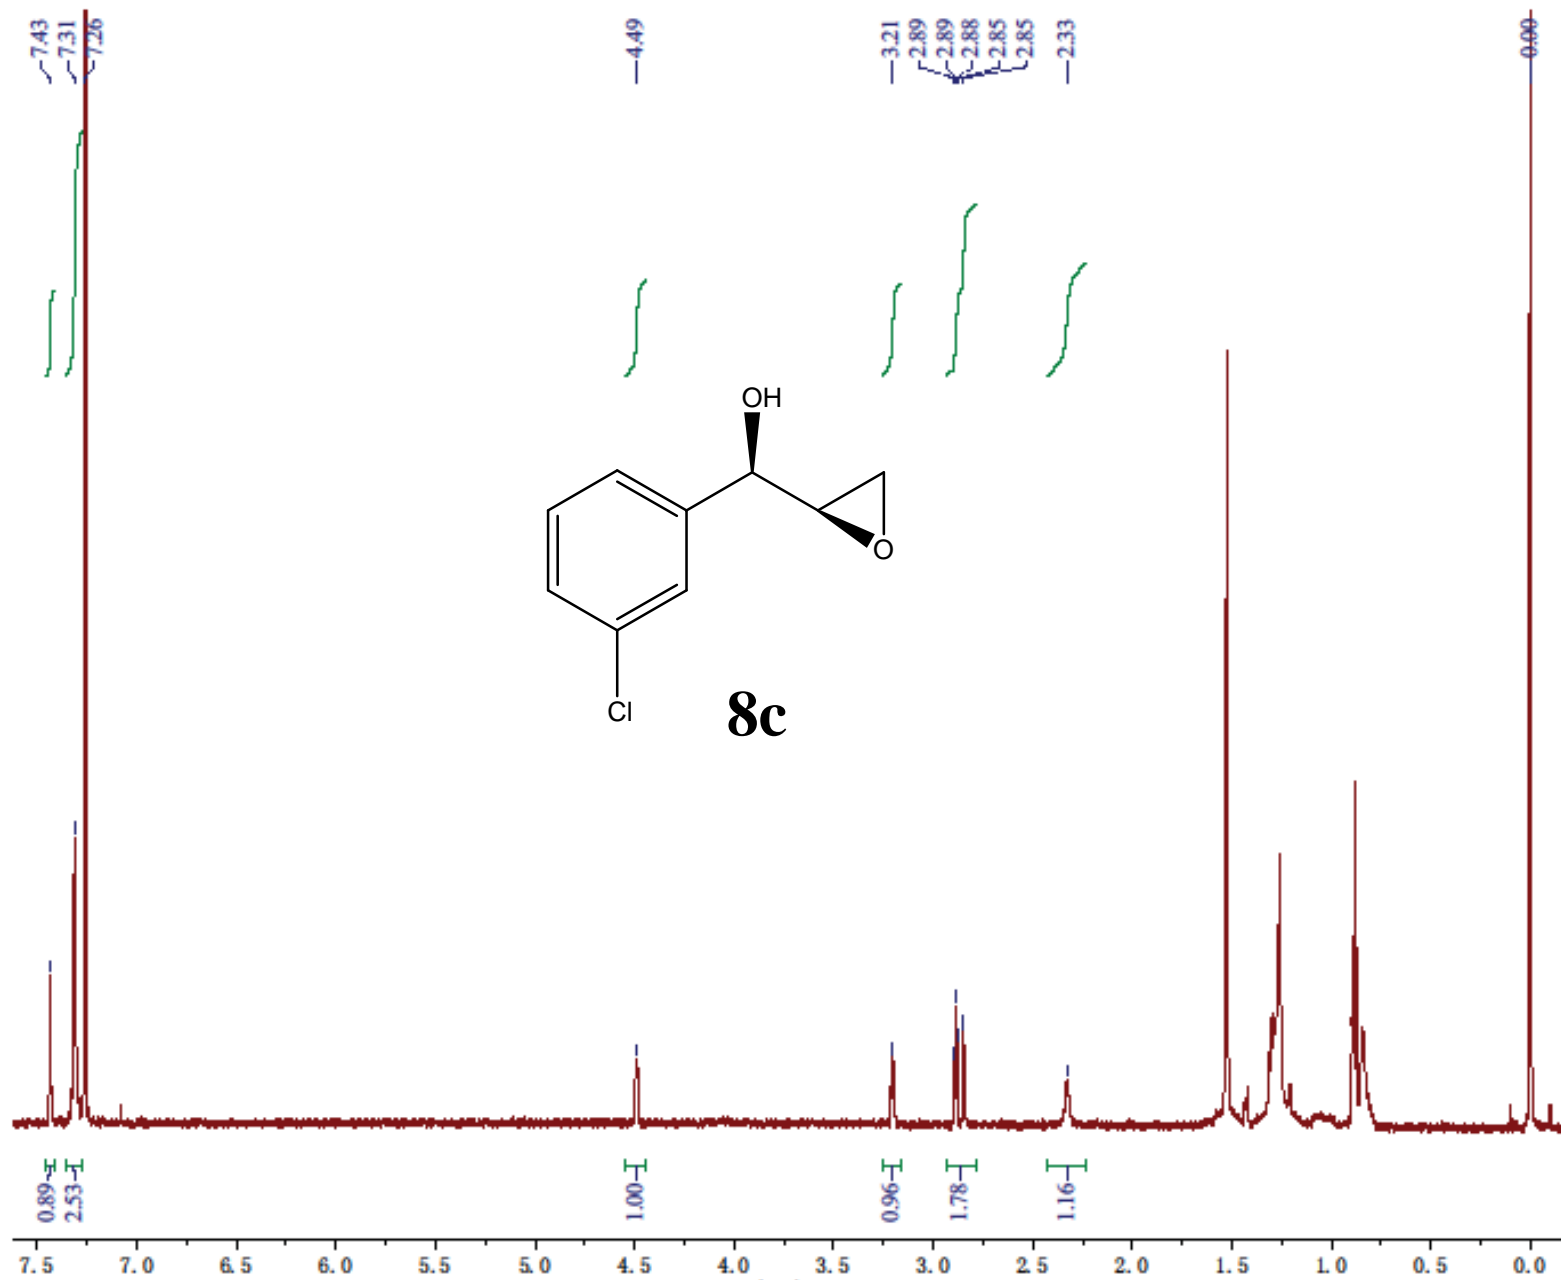

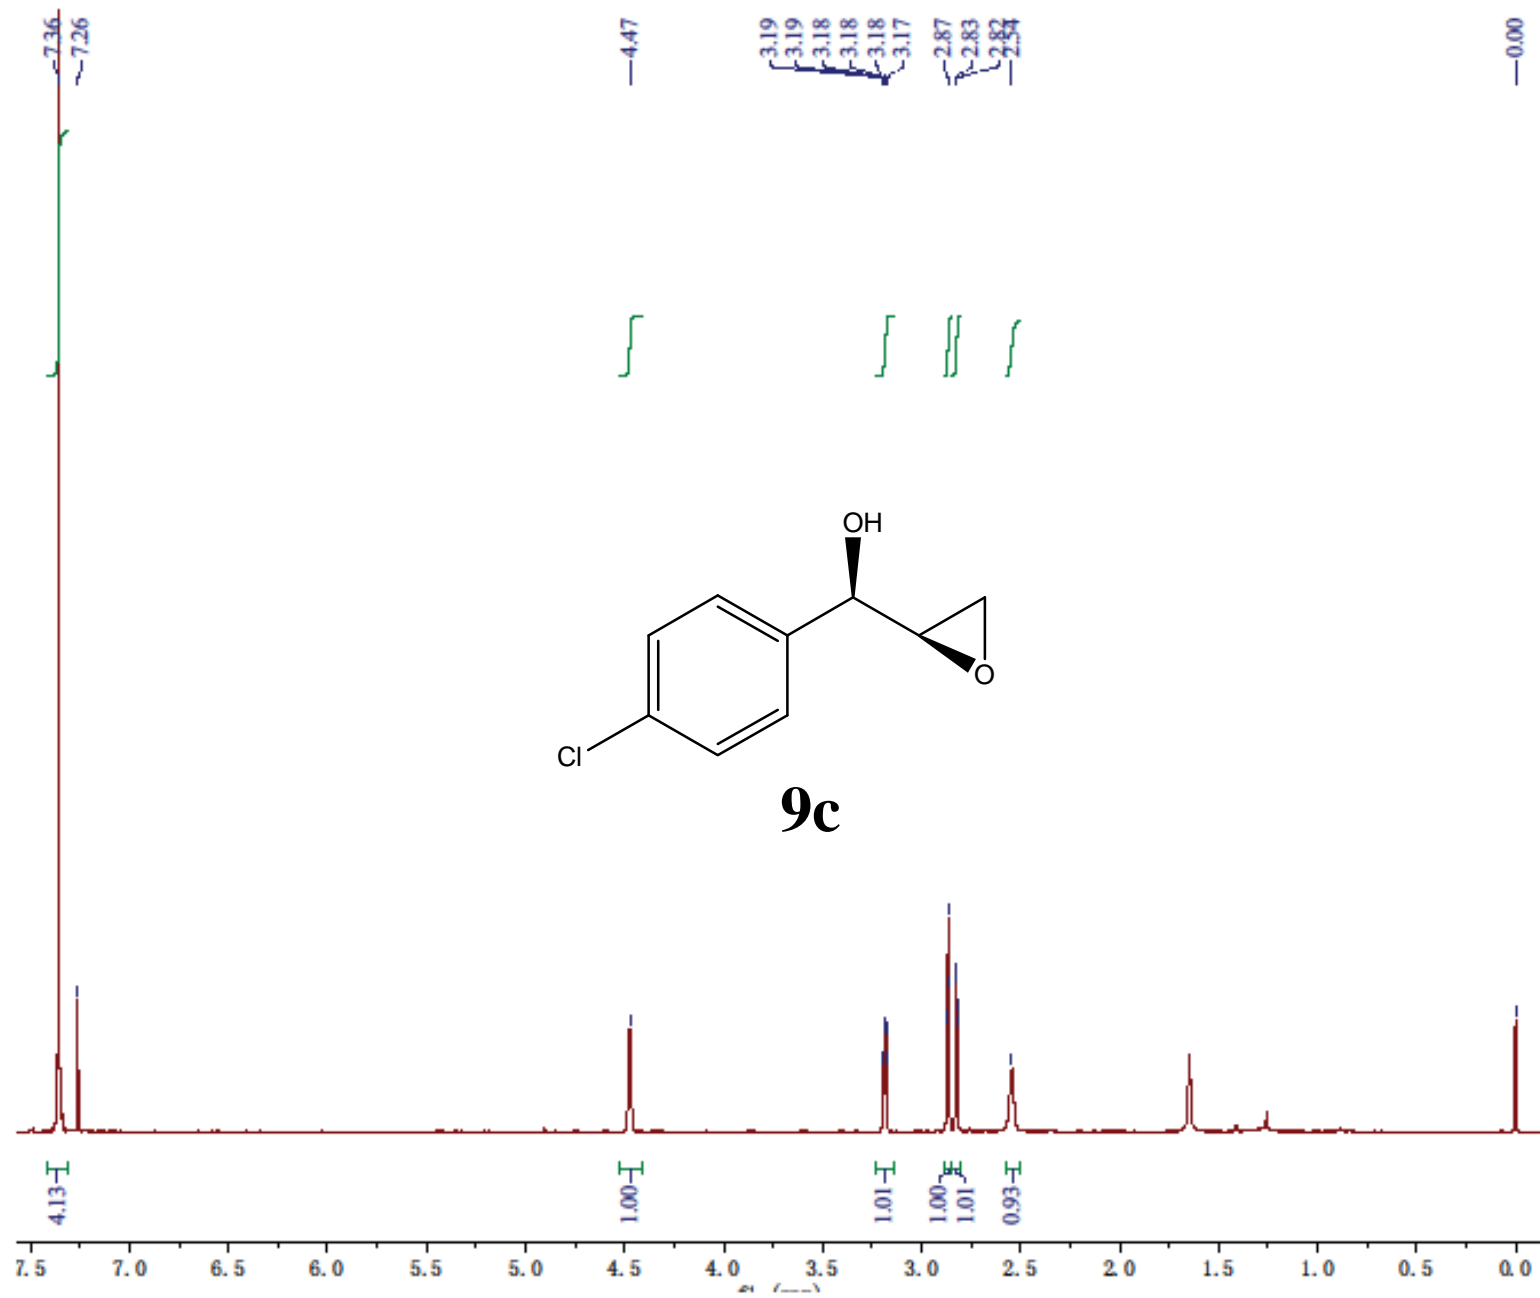

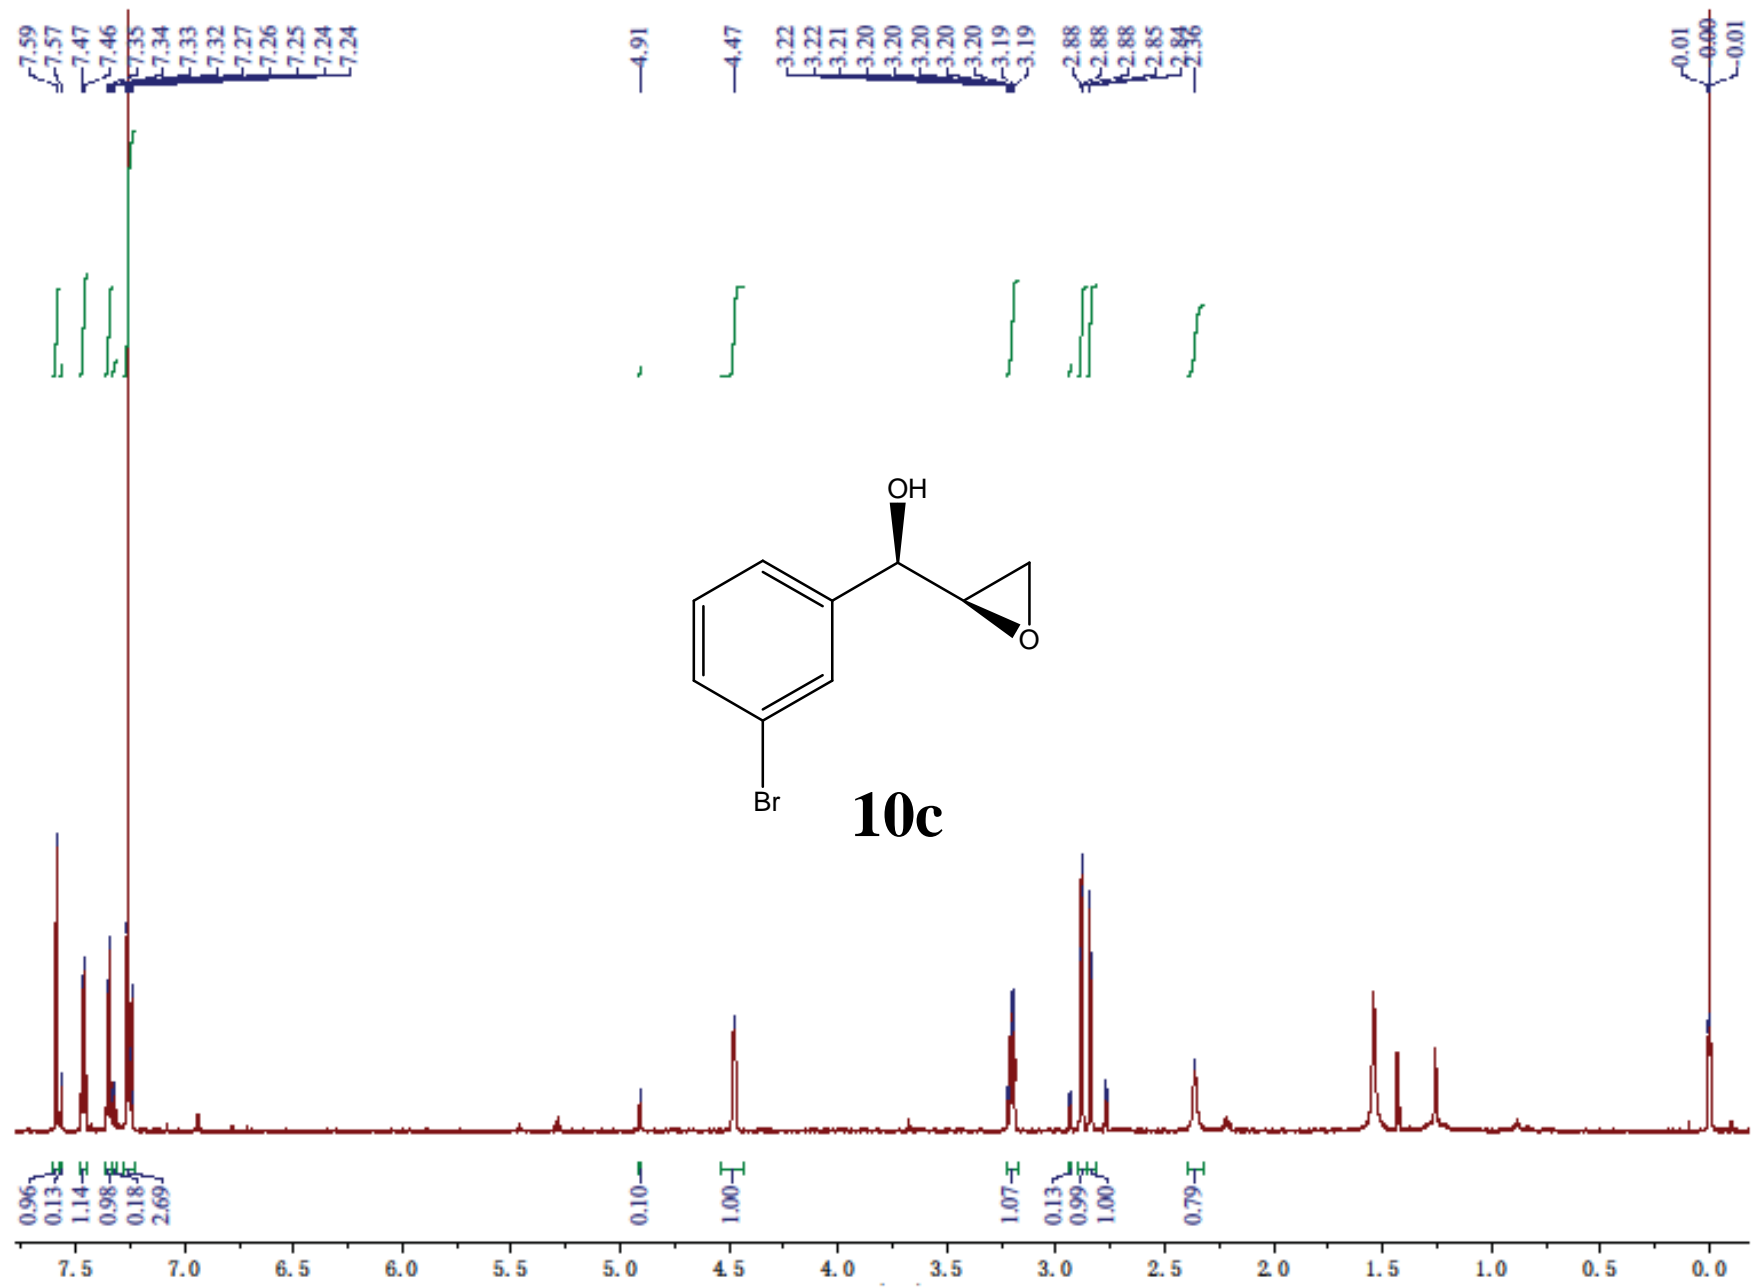

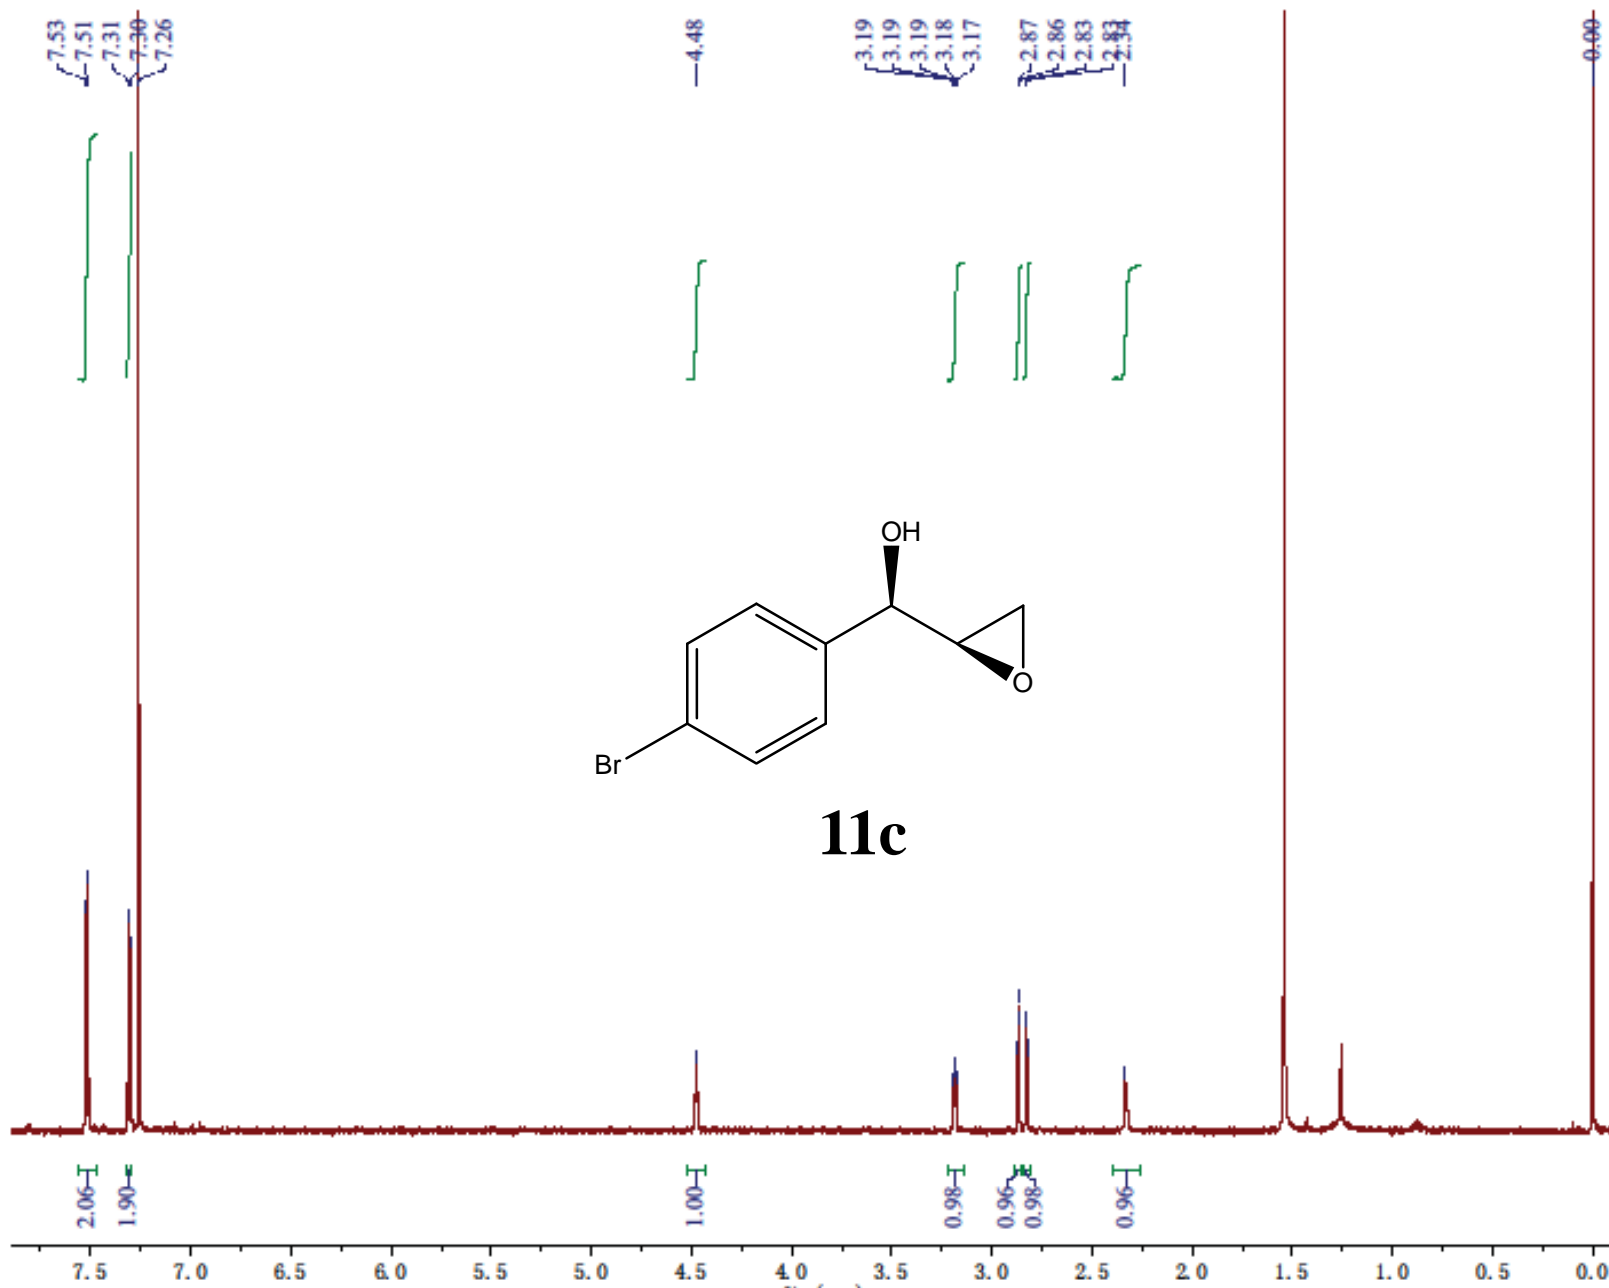

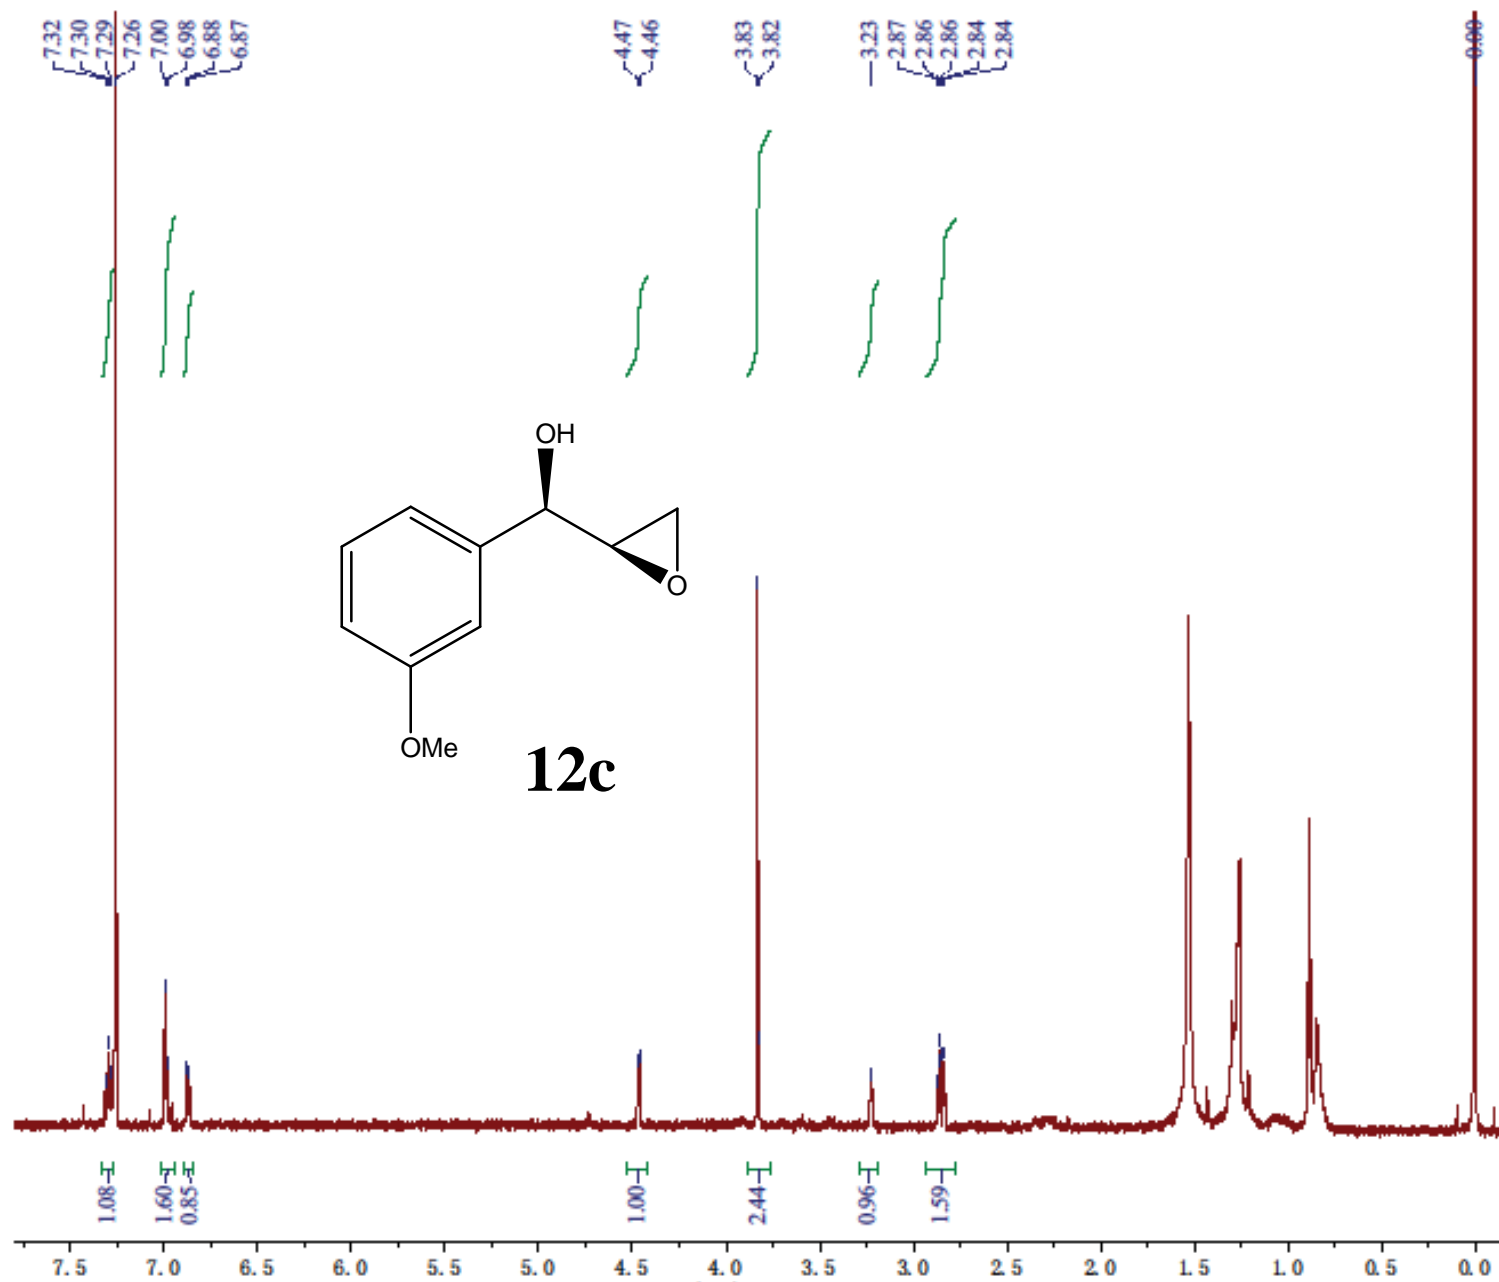

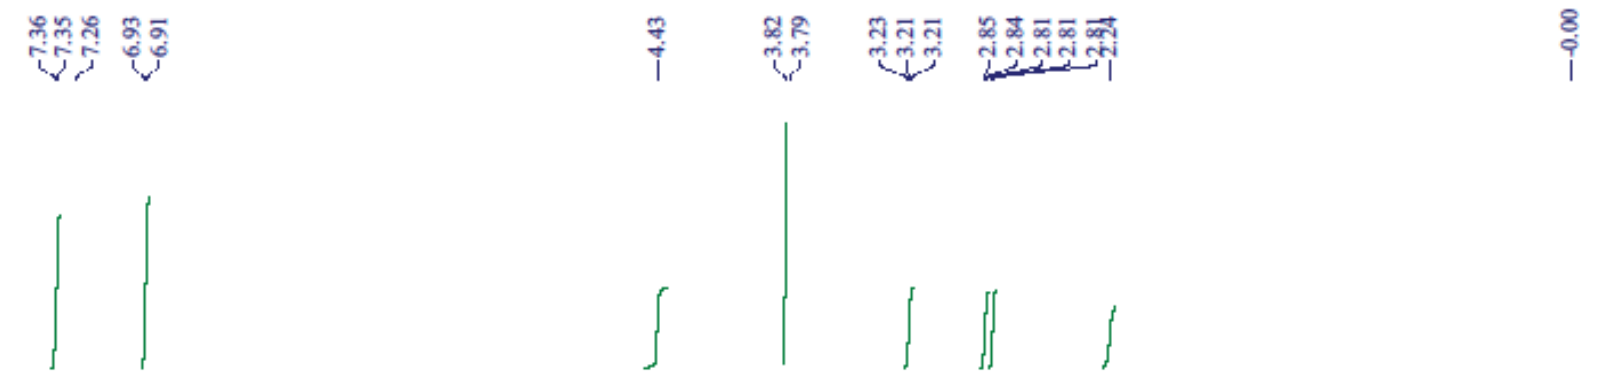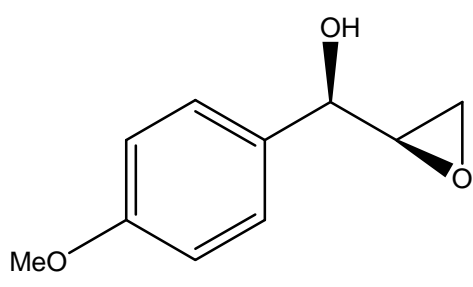

**13c**

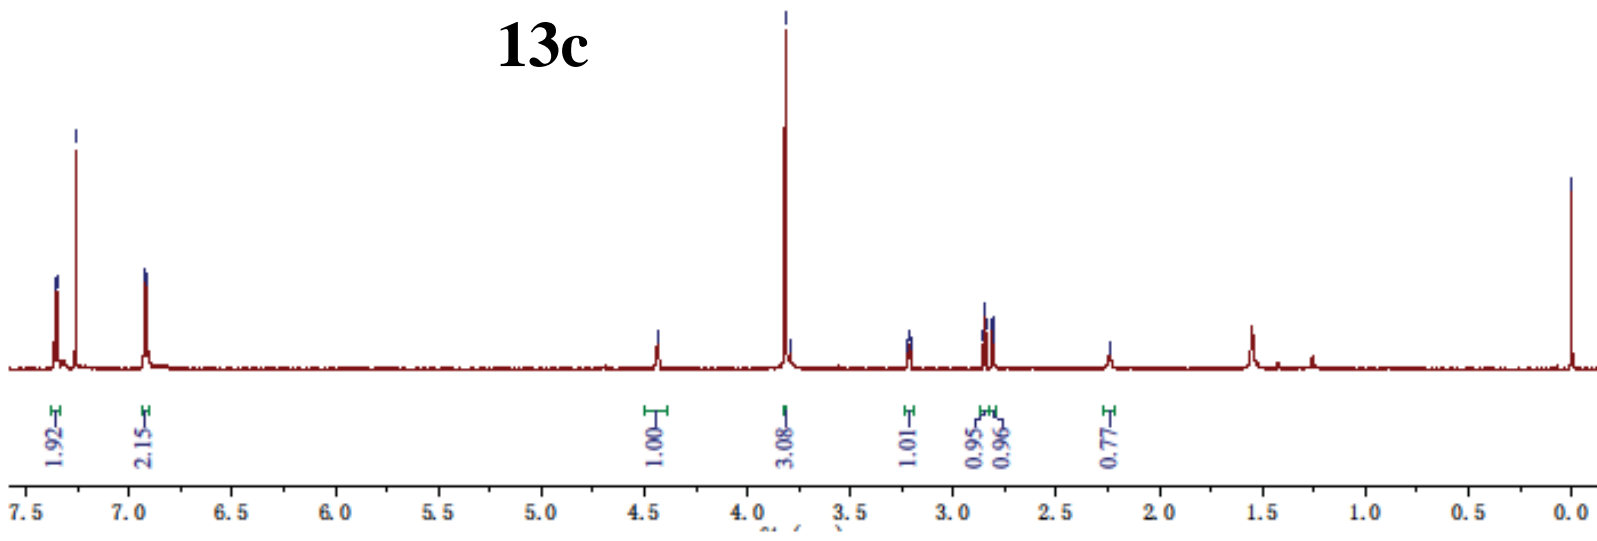

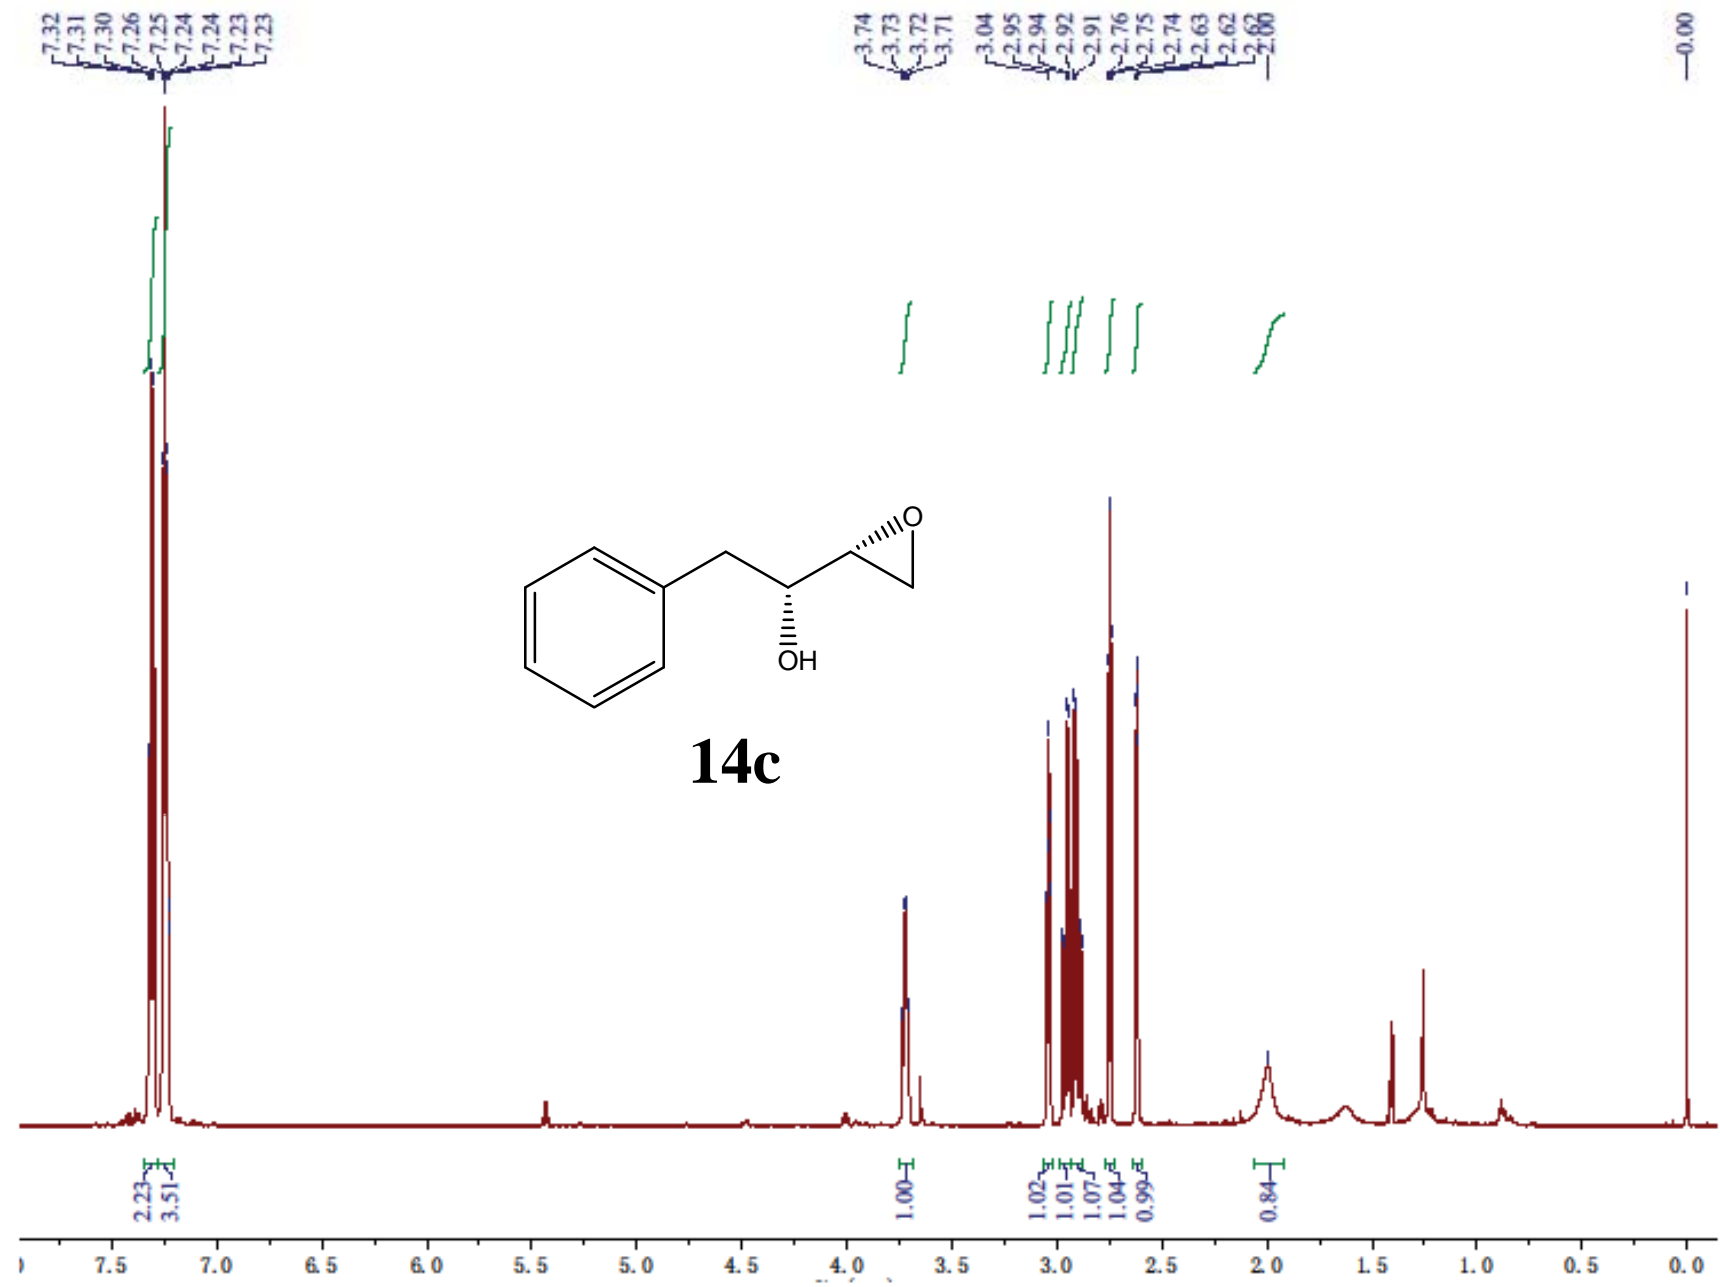

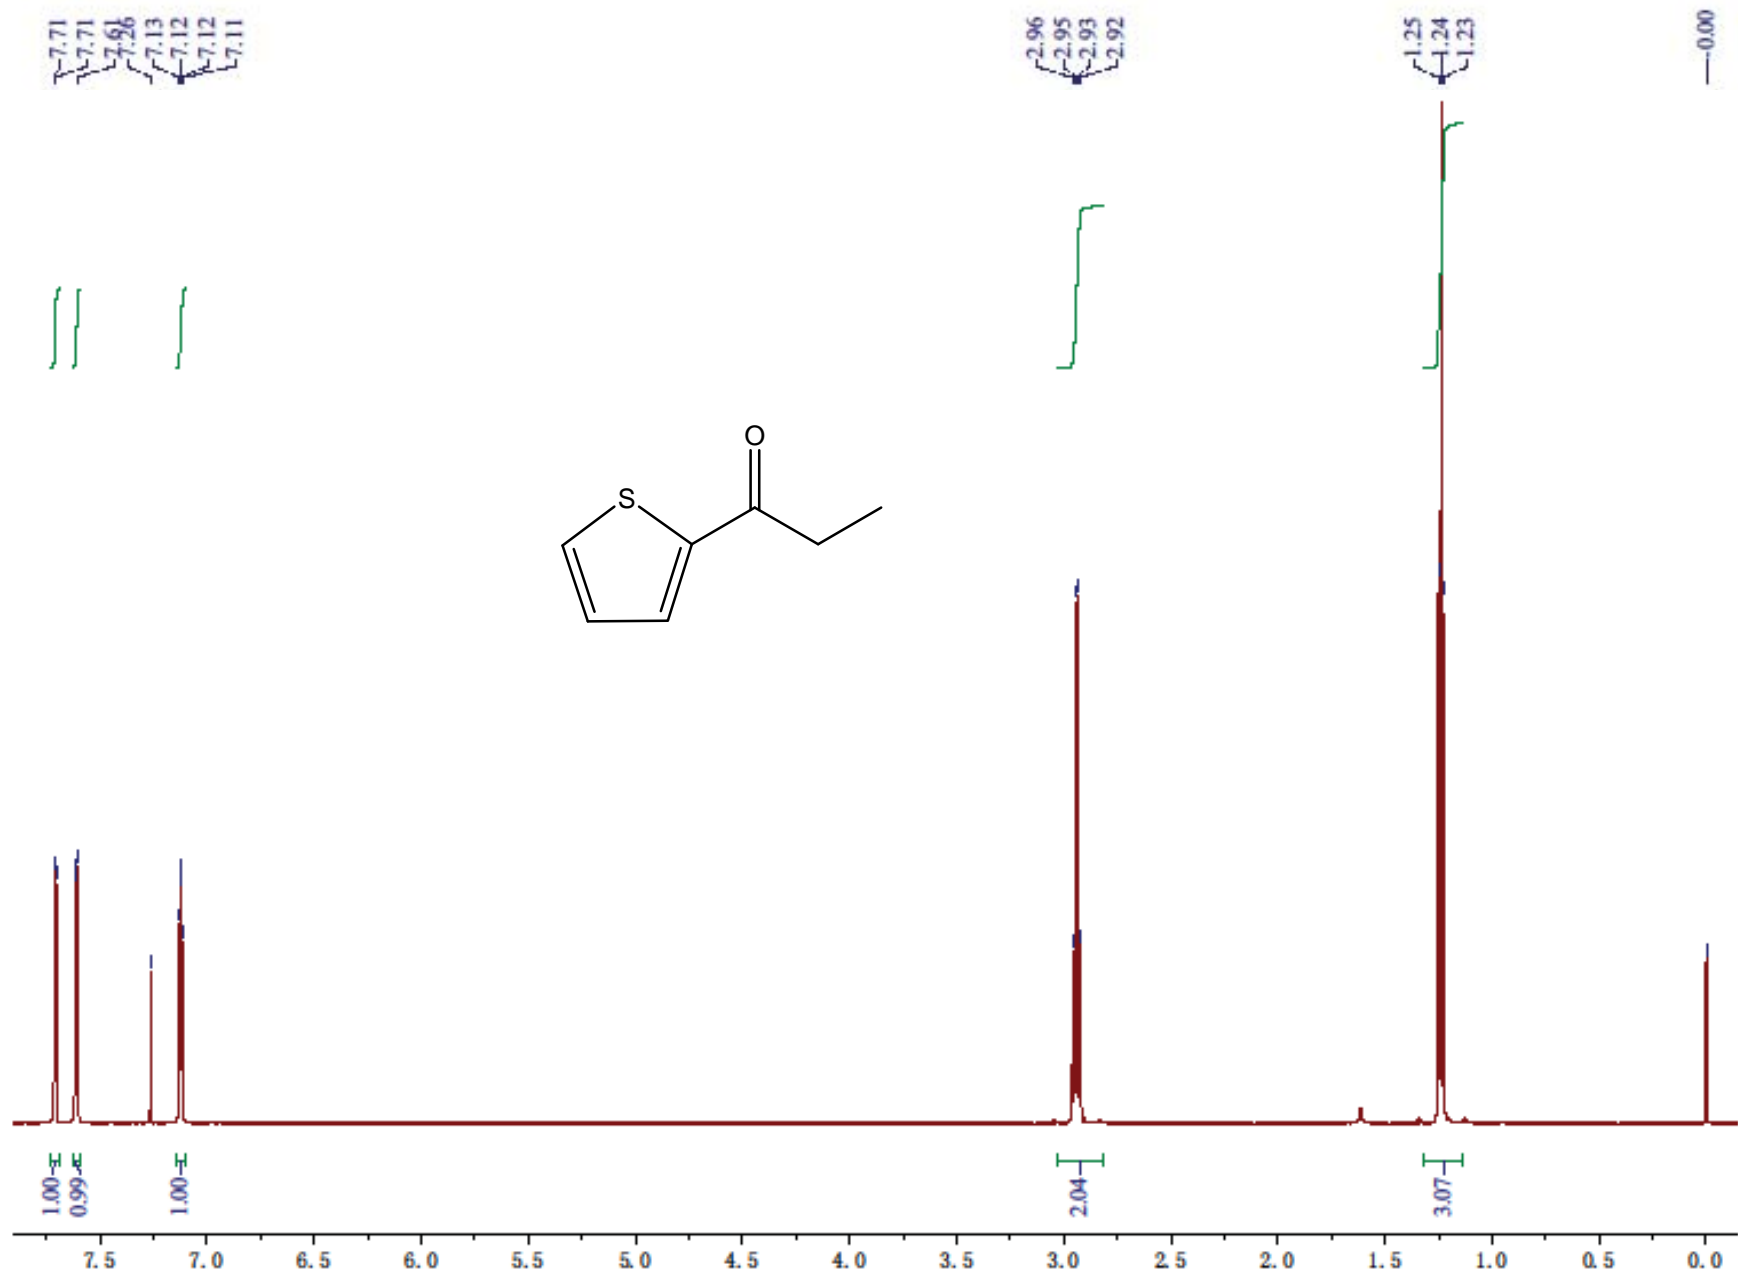



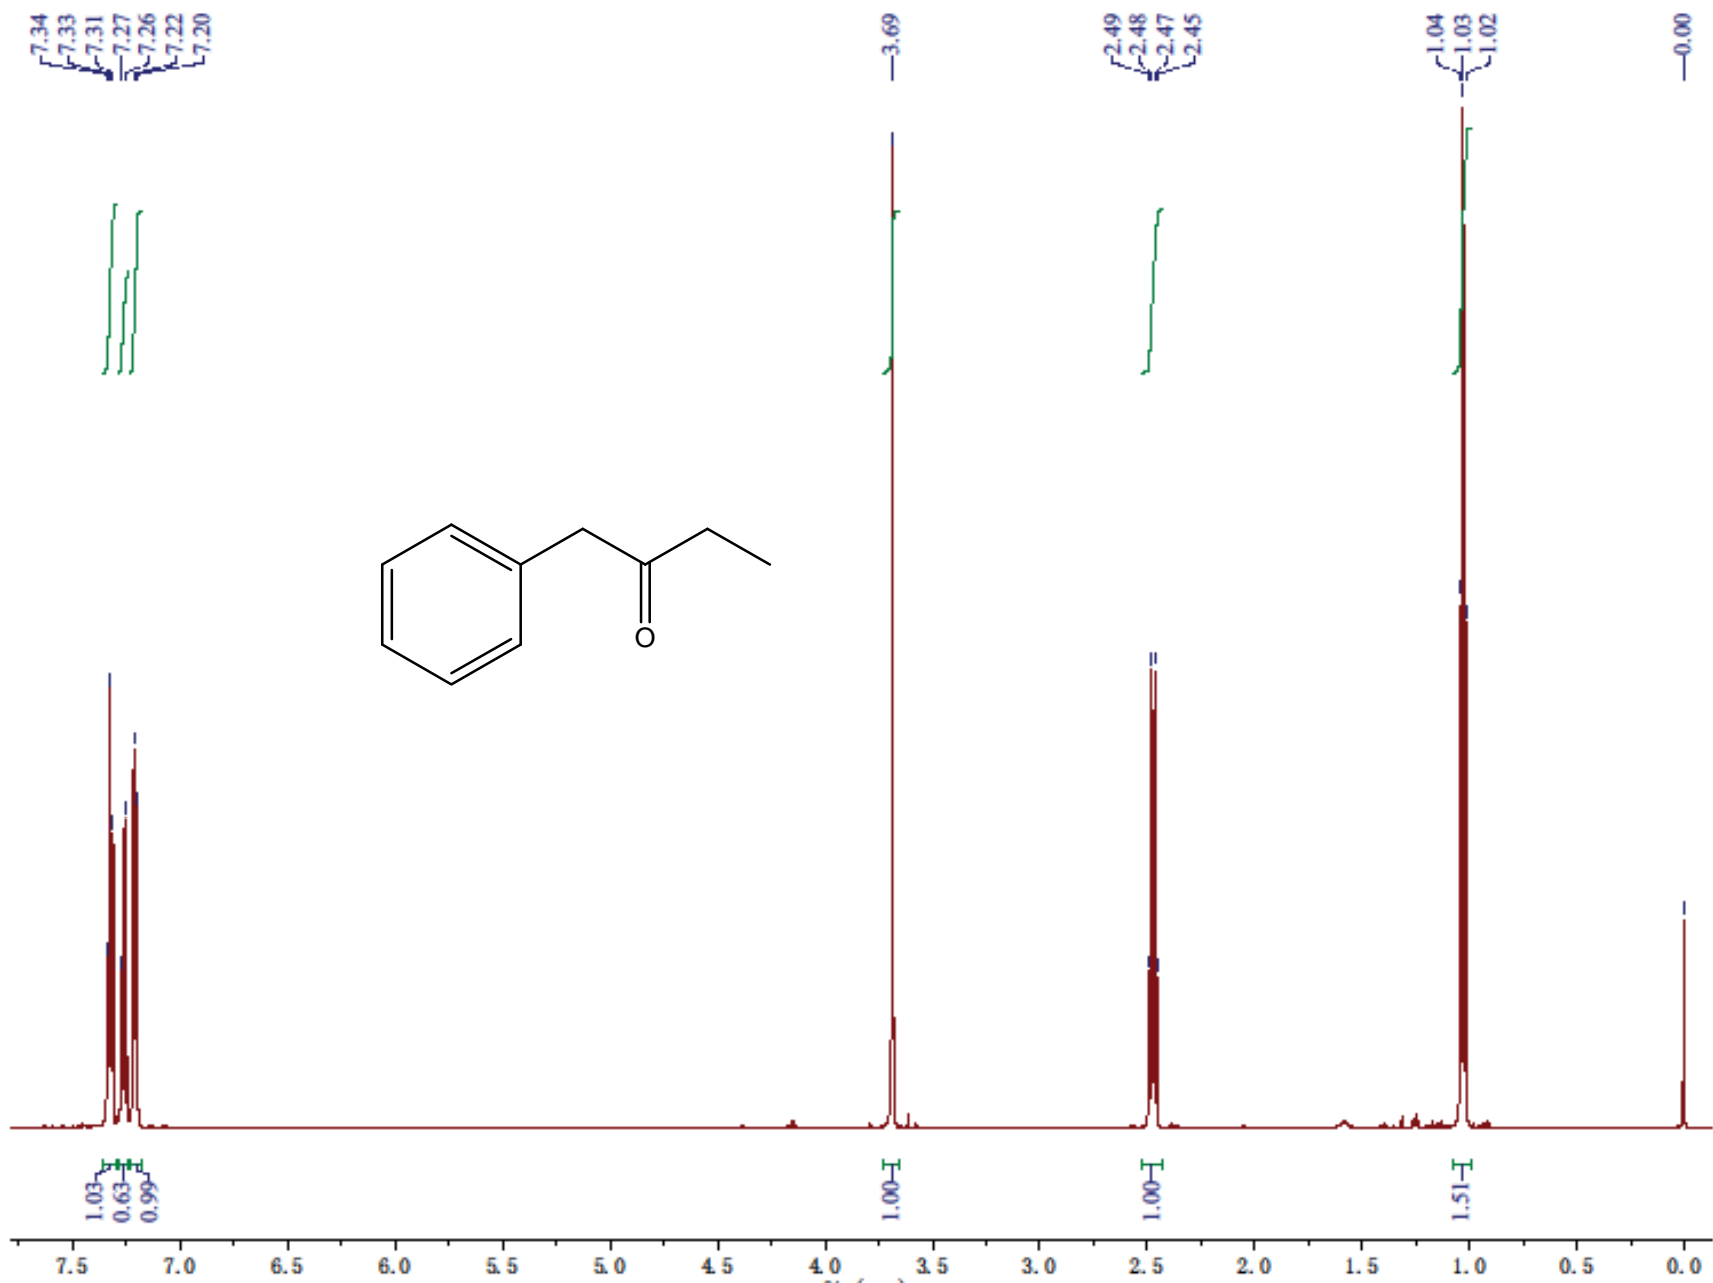

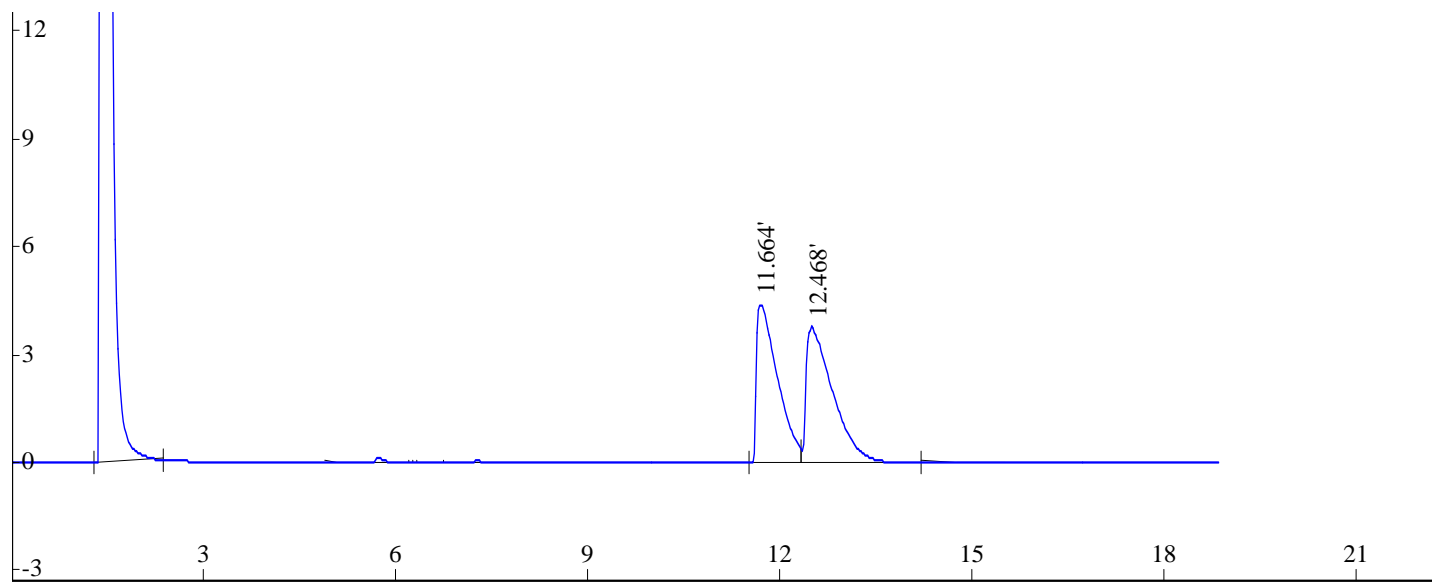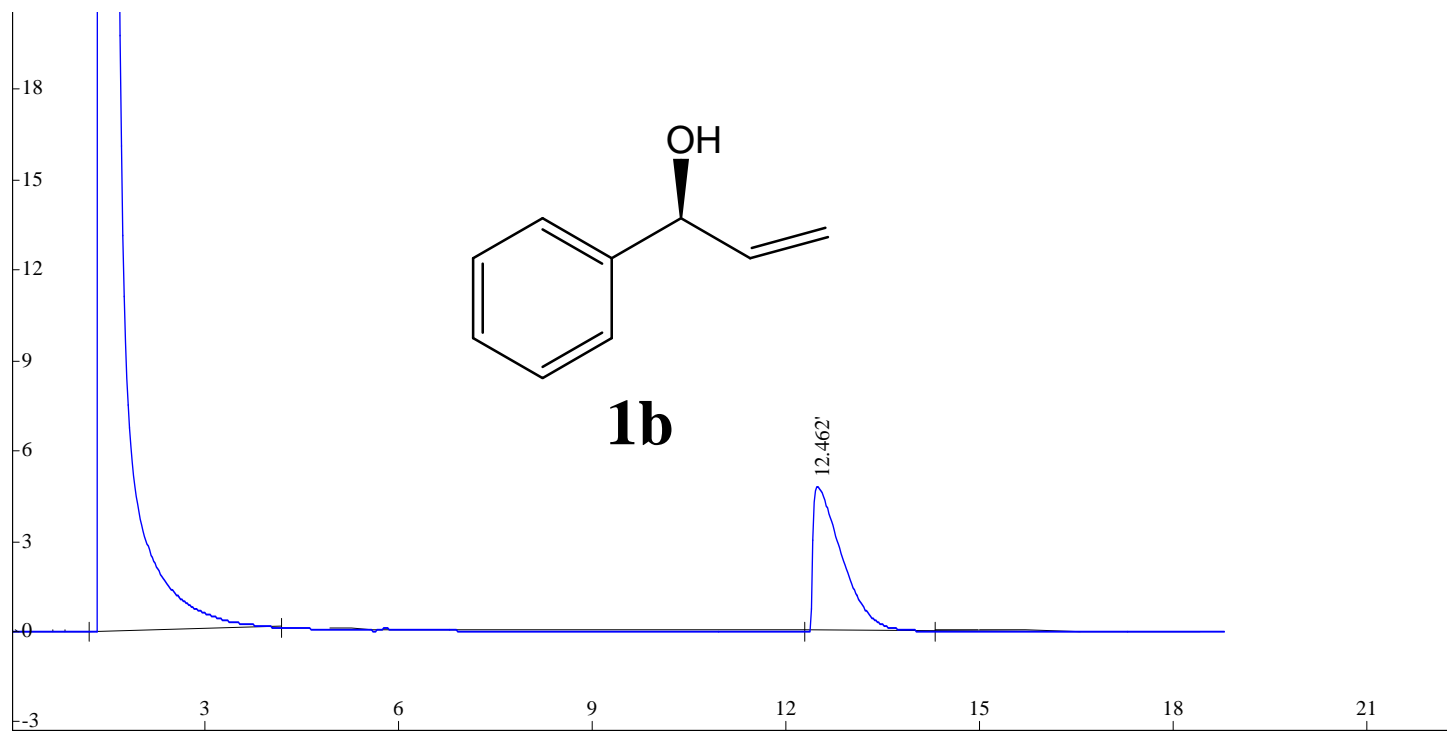

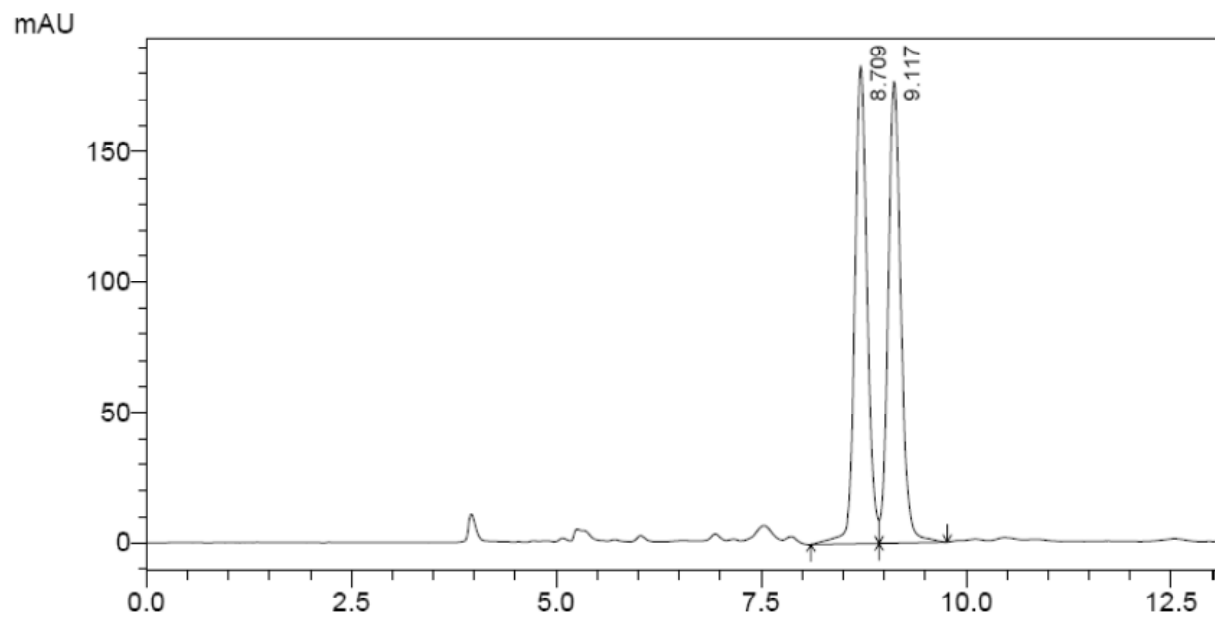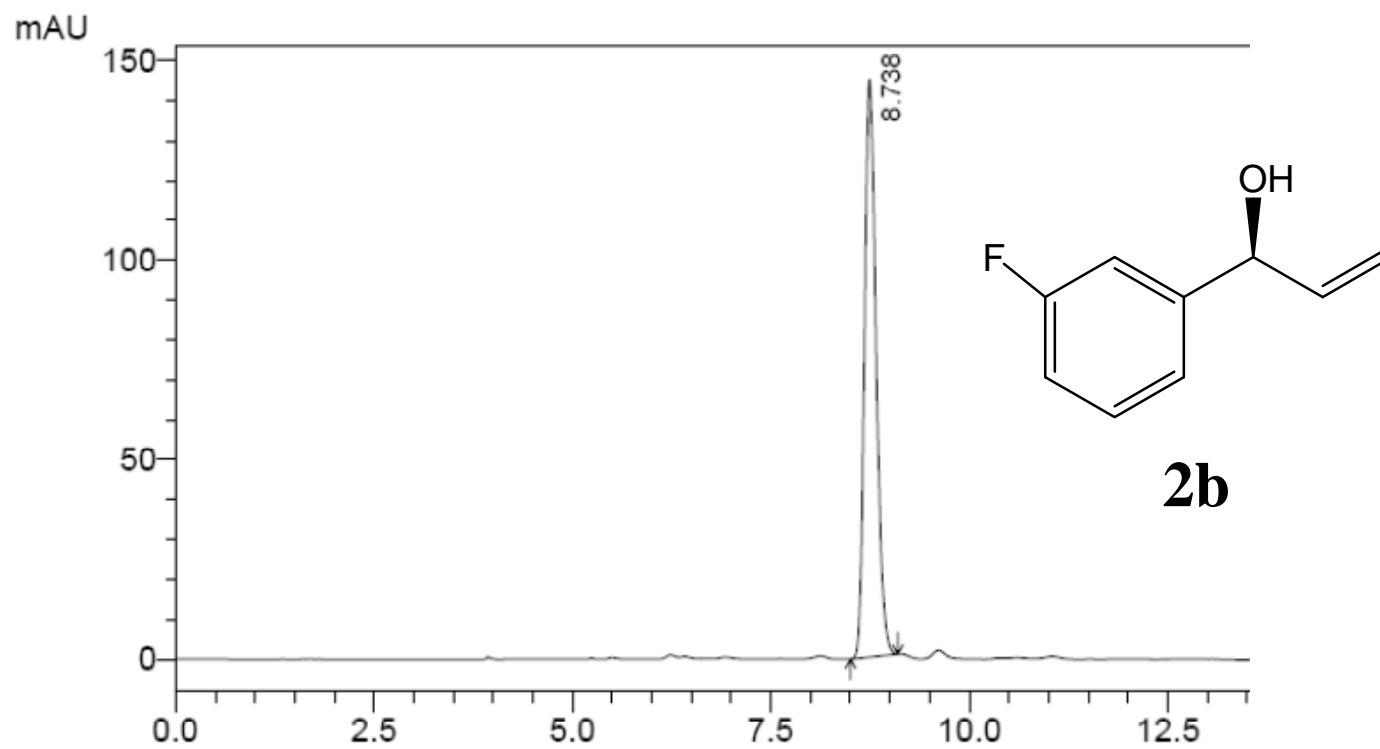

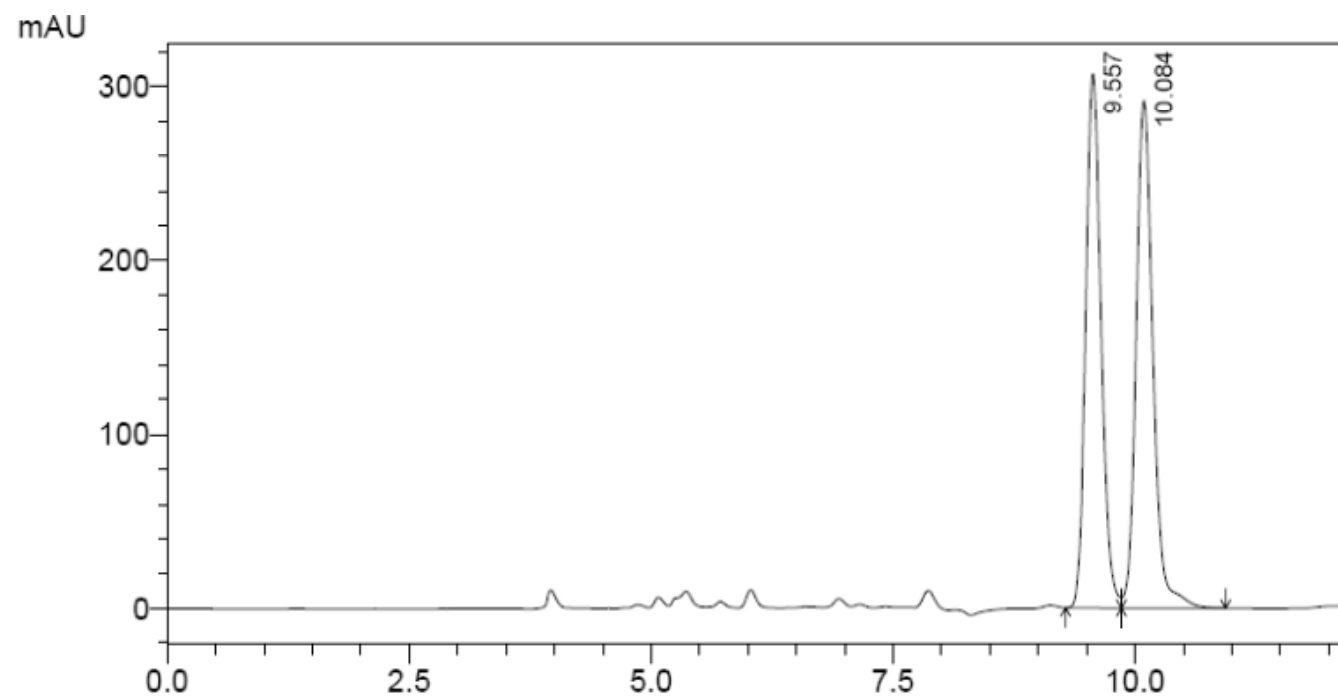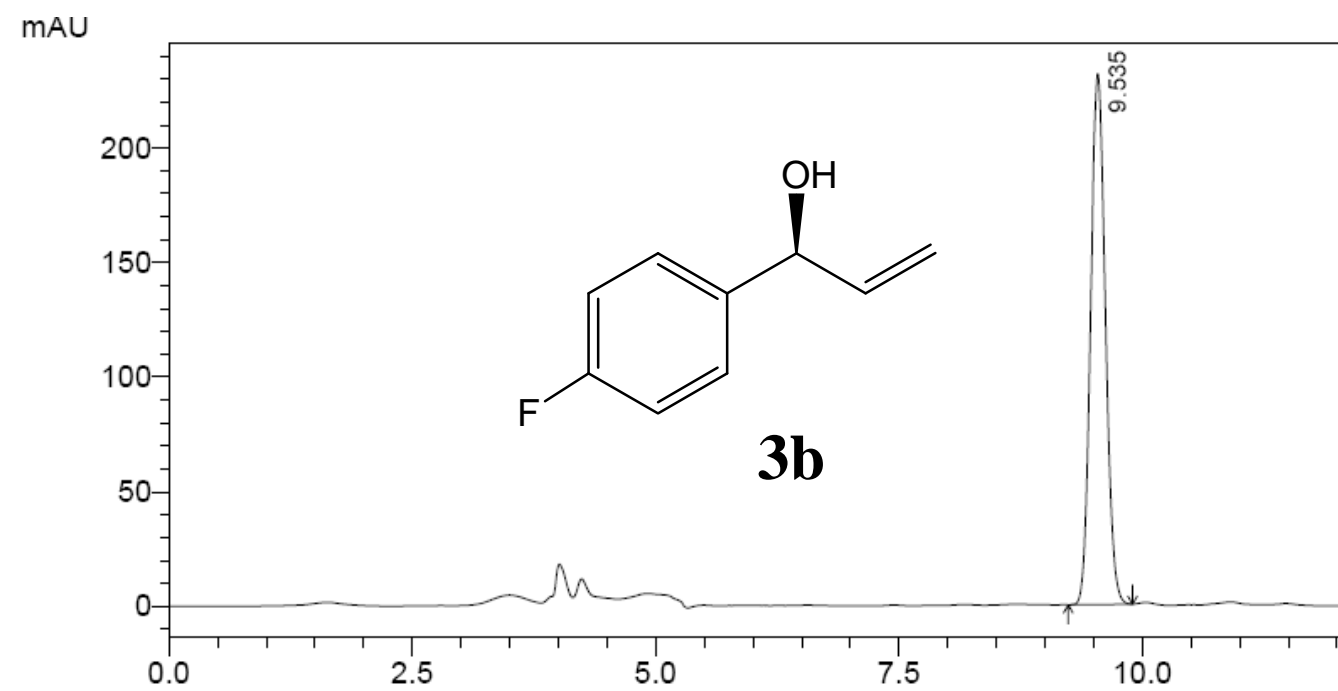

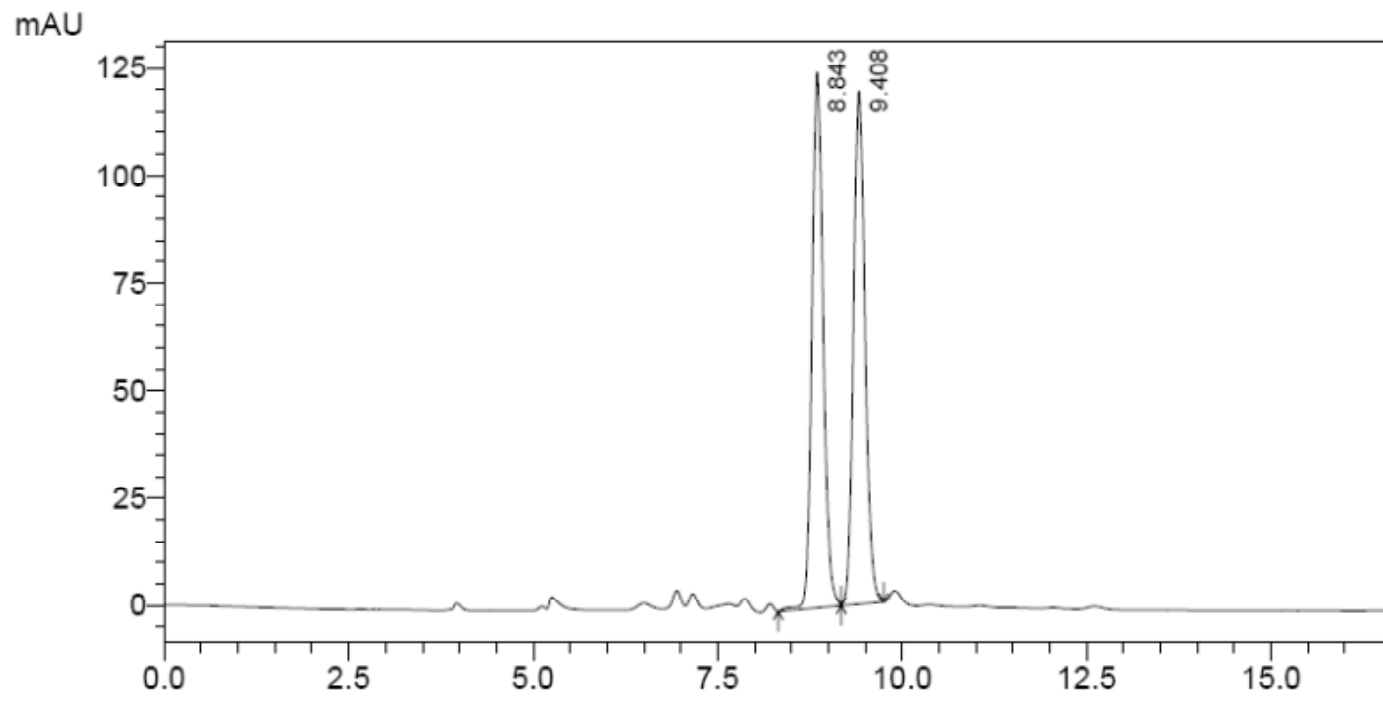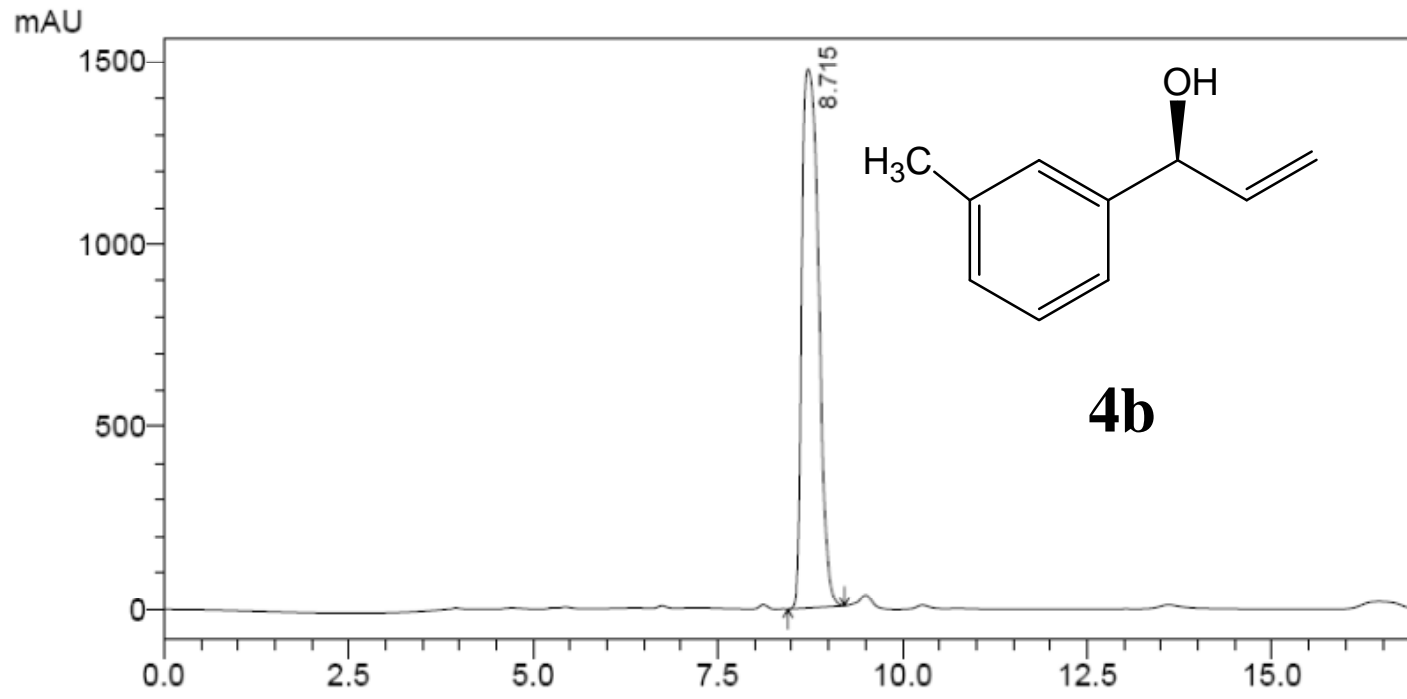

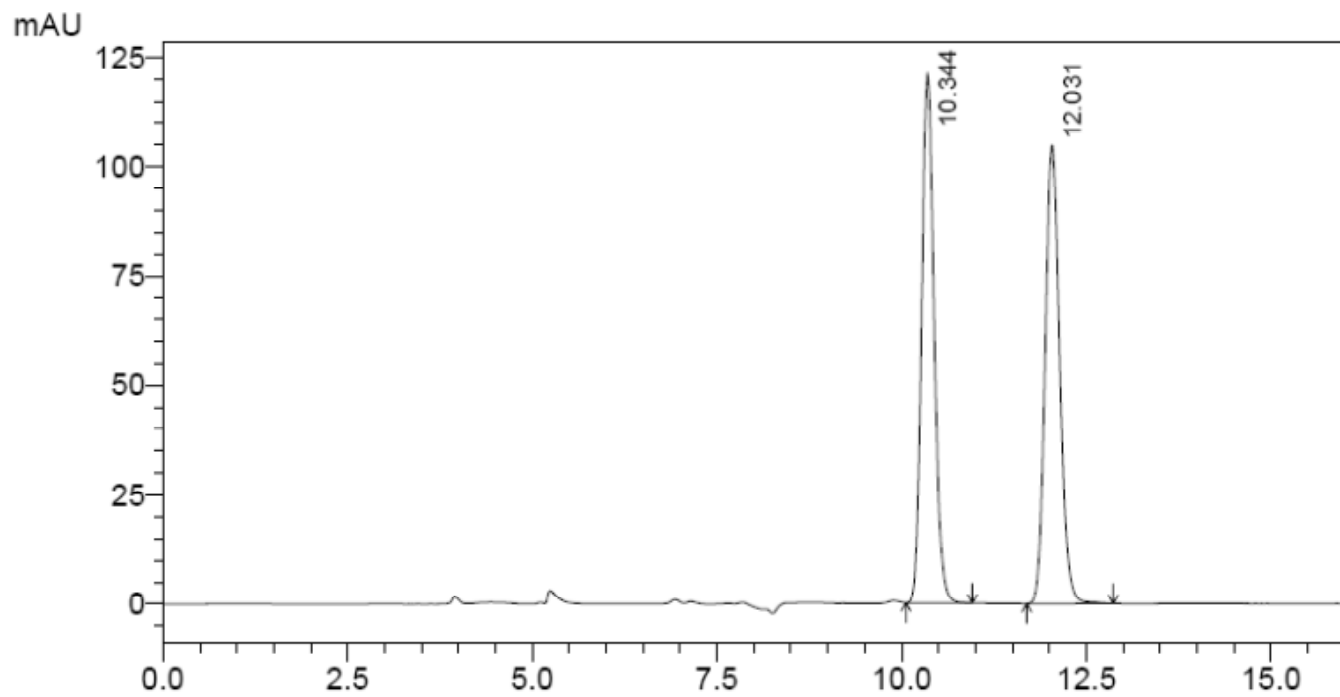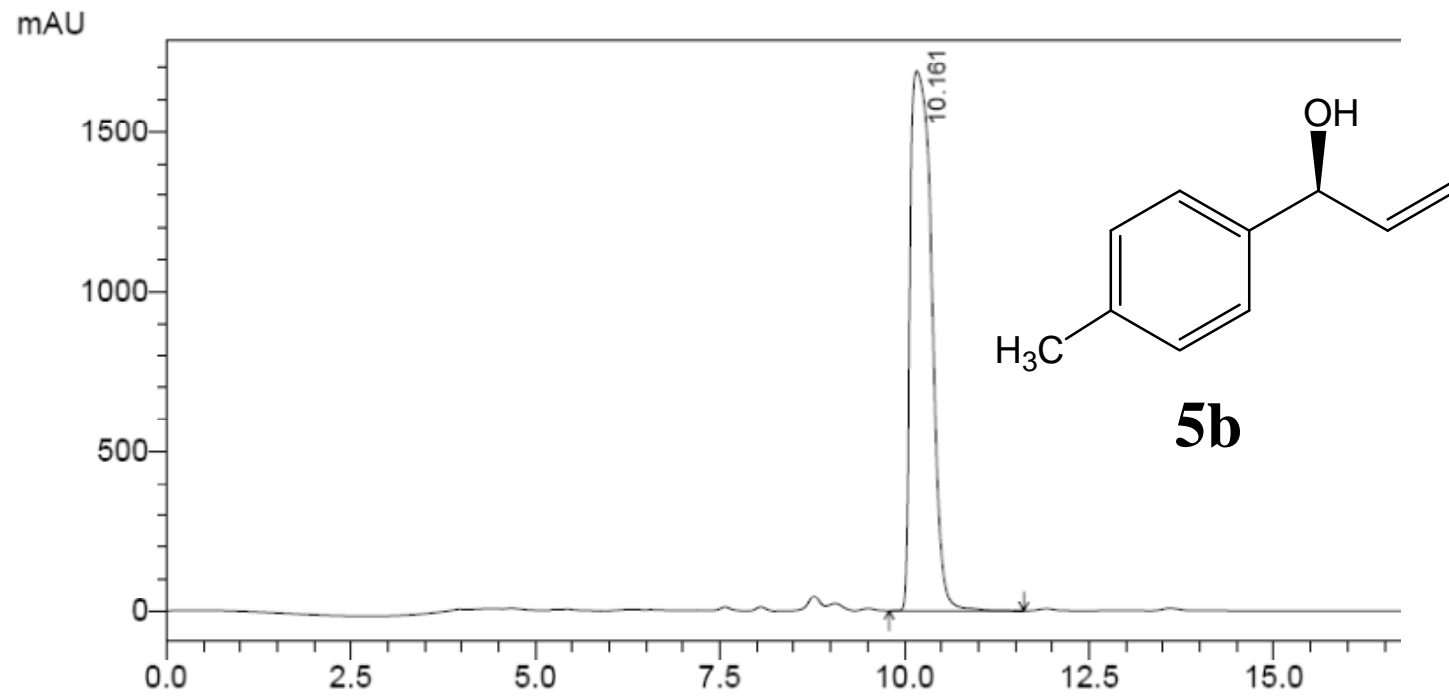

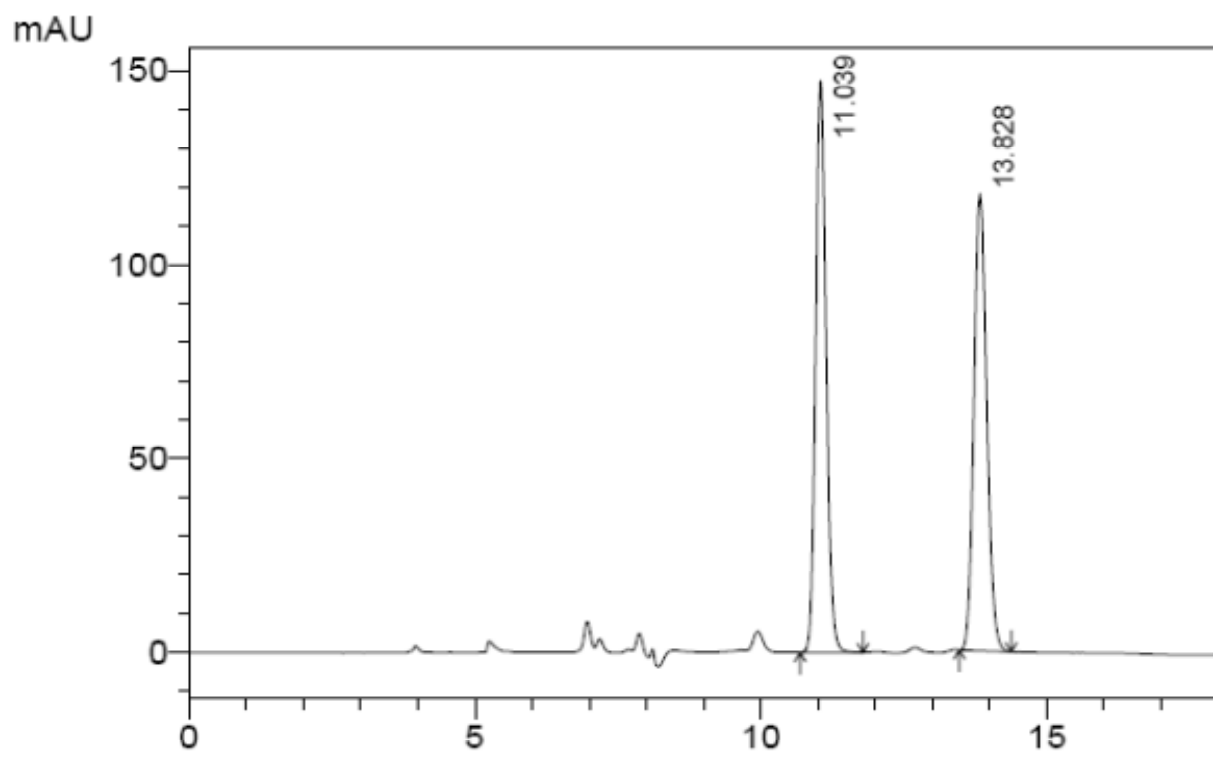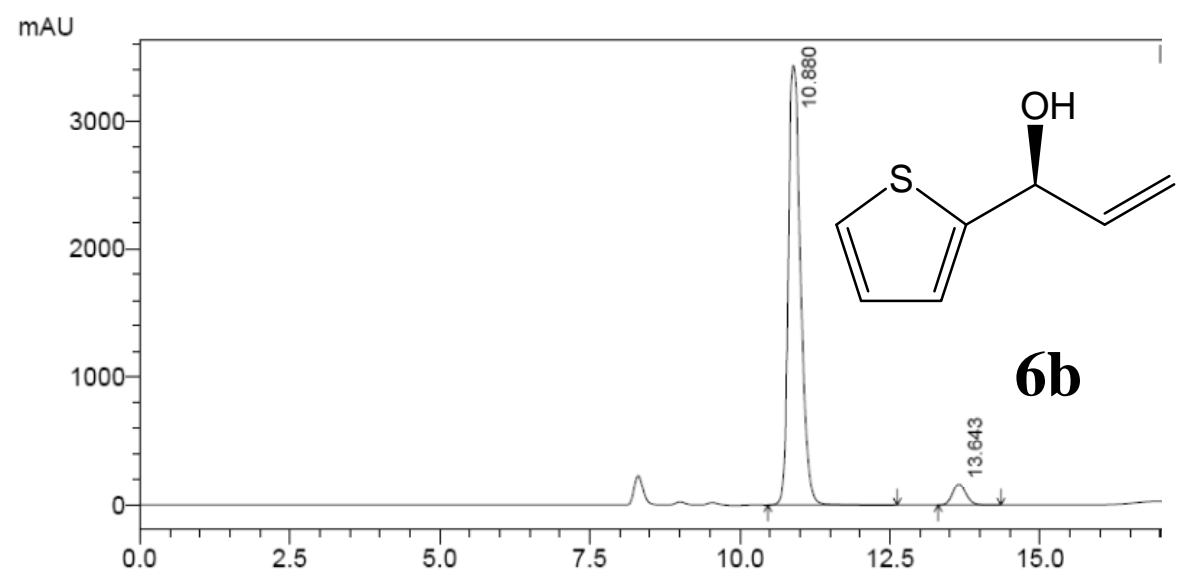

mAU

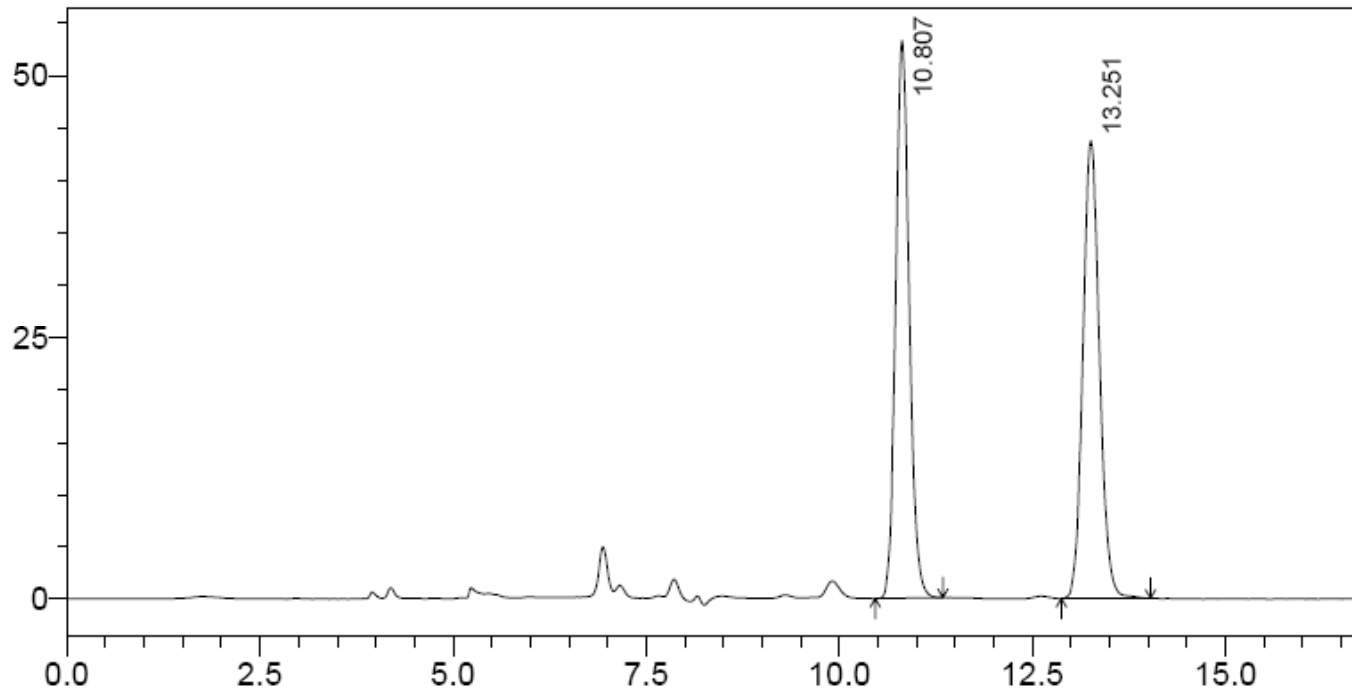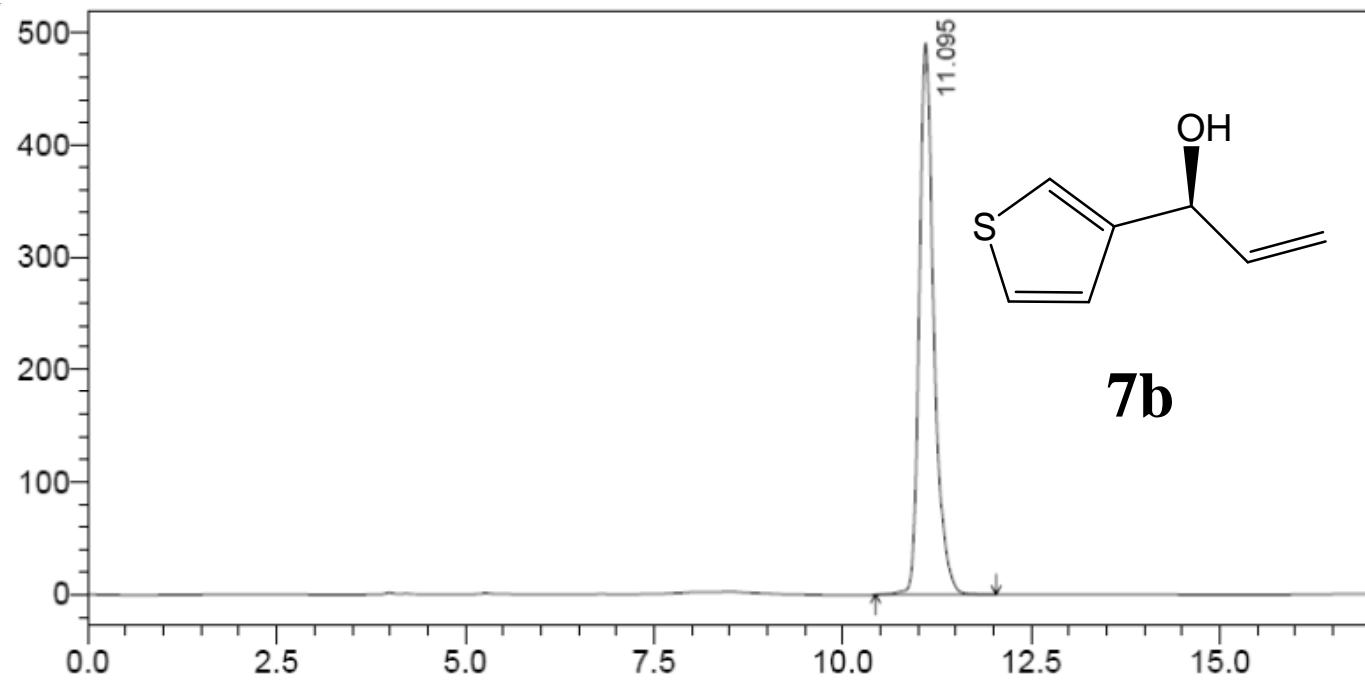



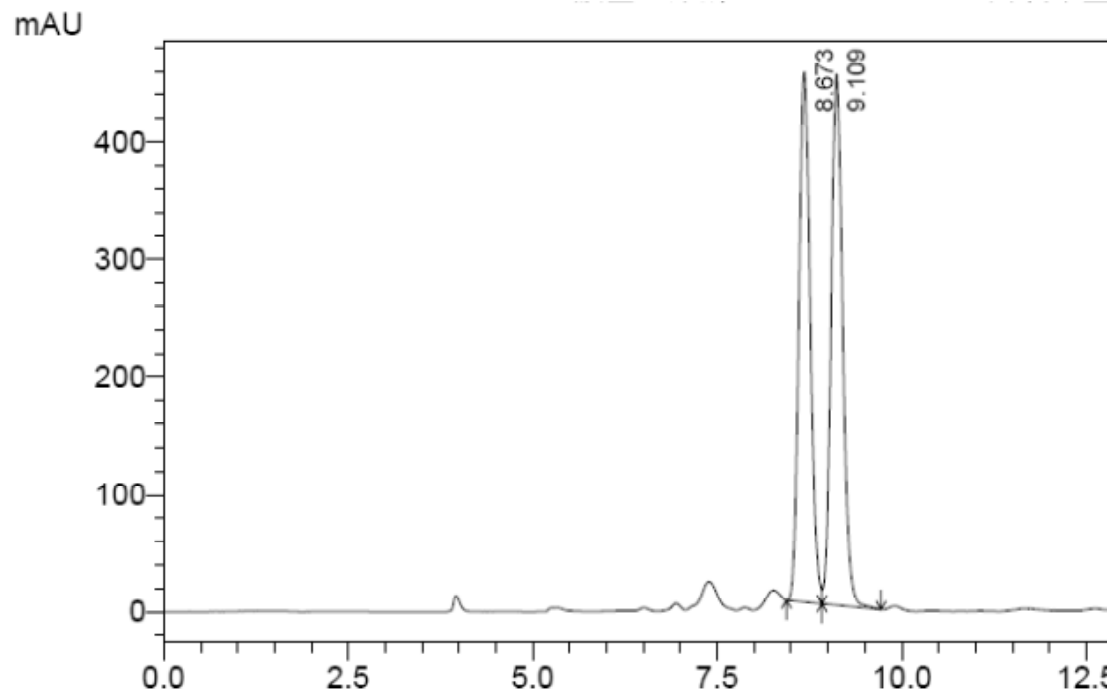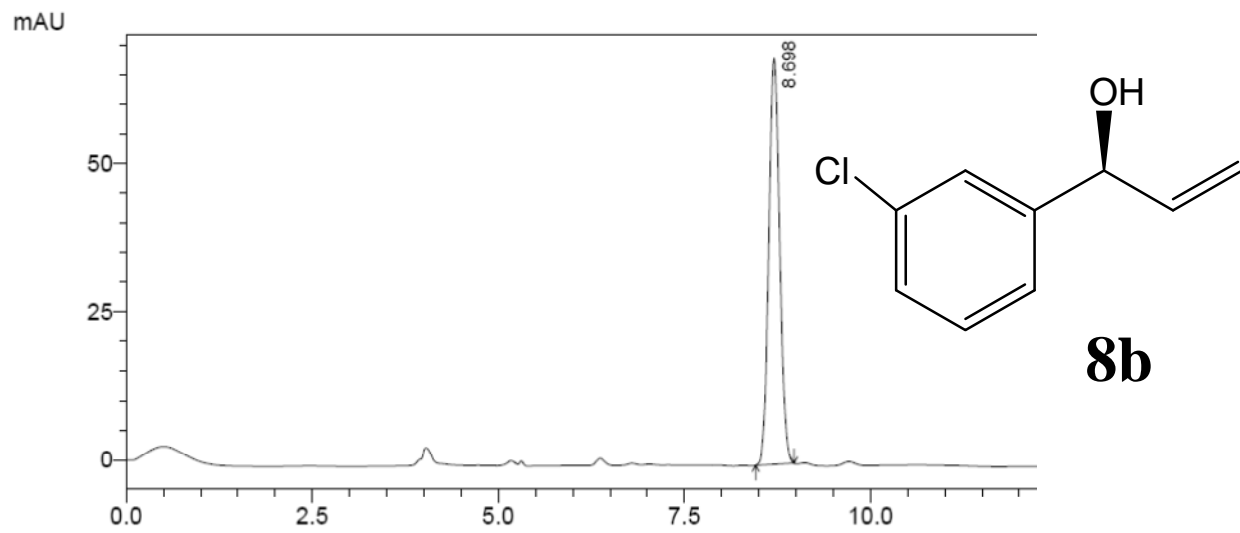

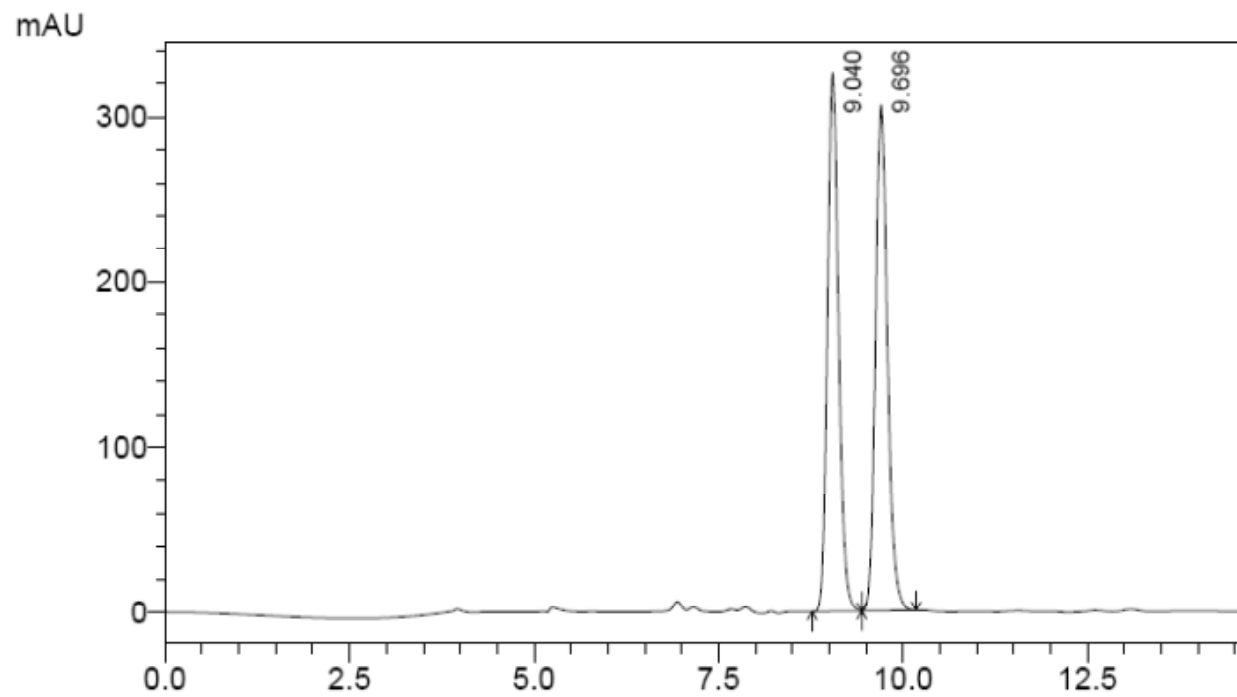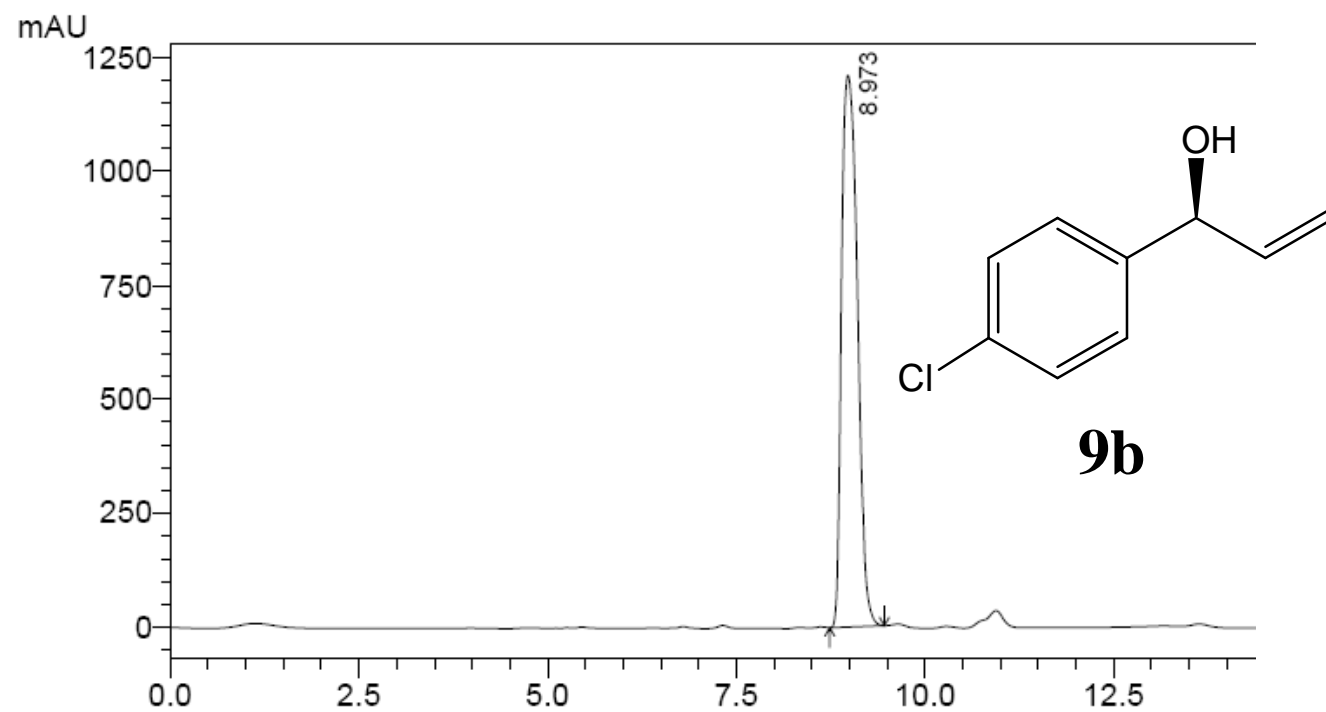

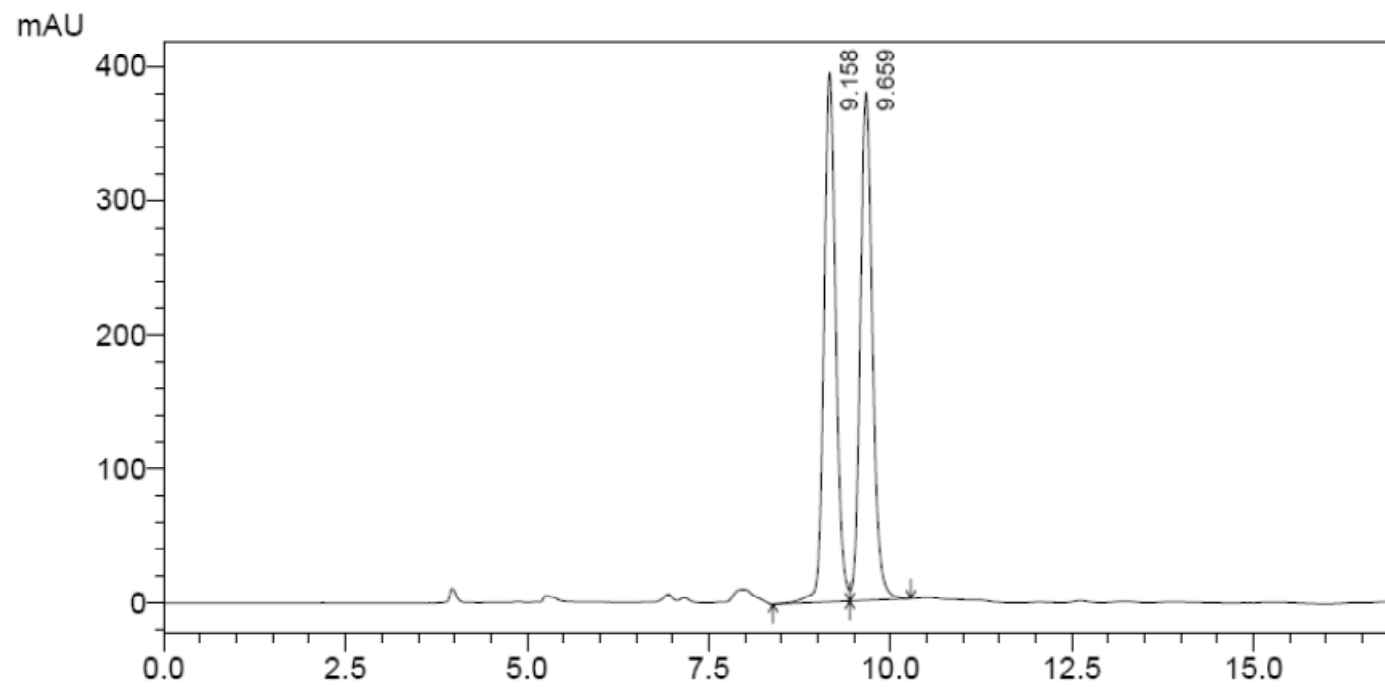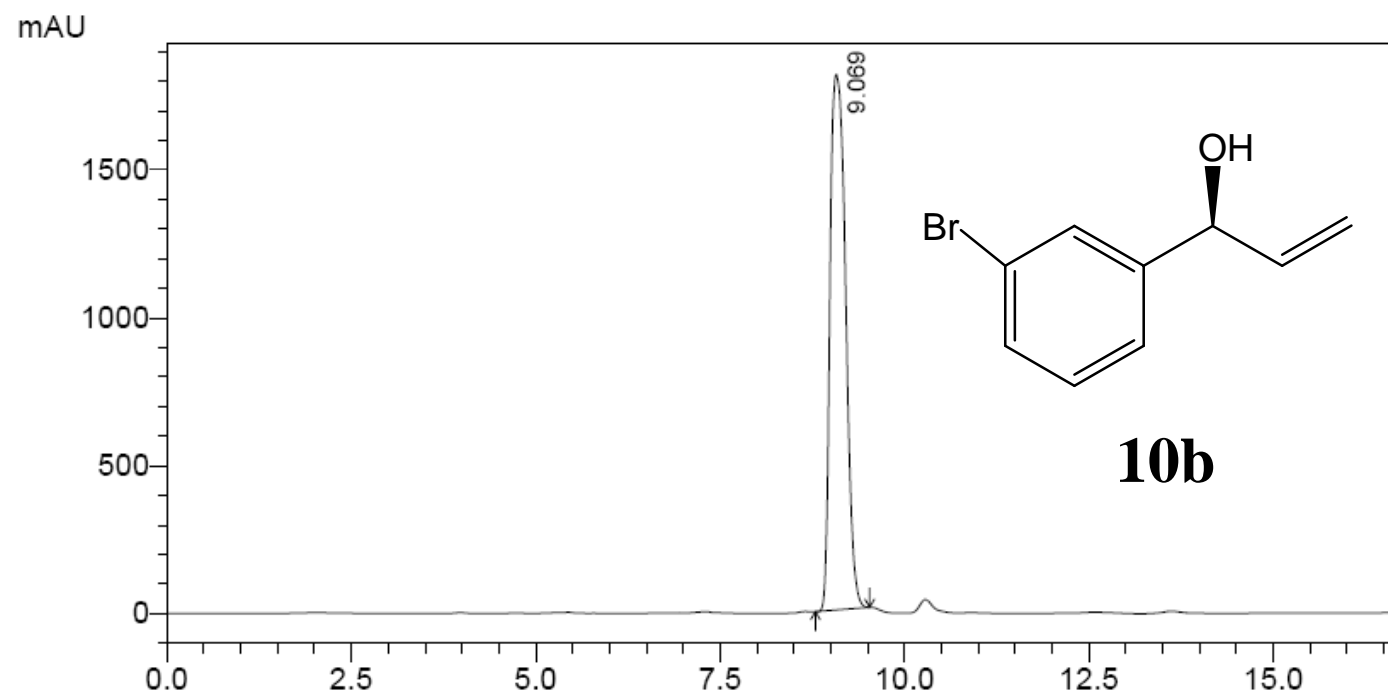

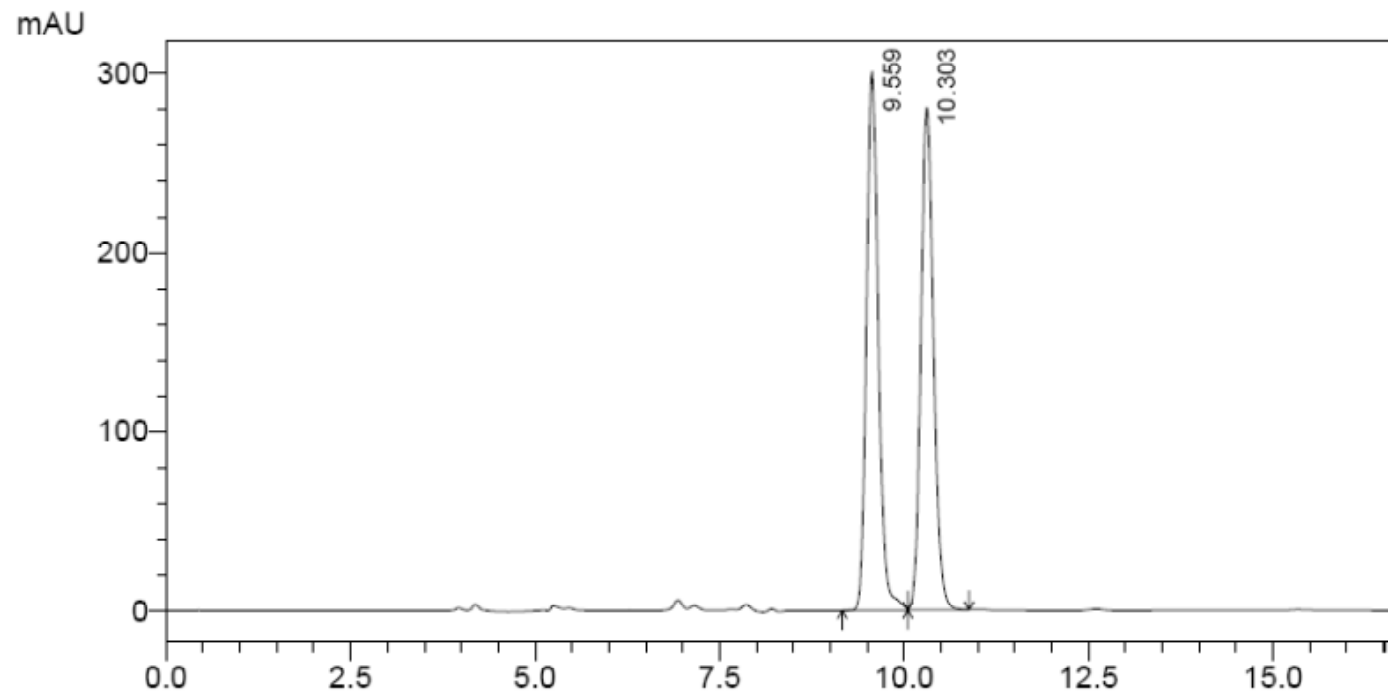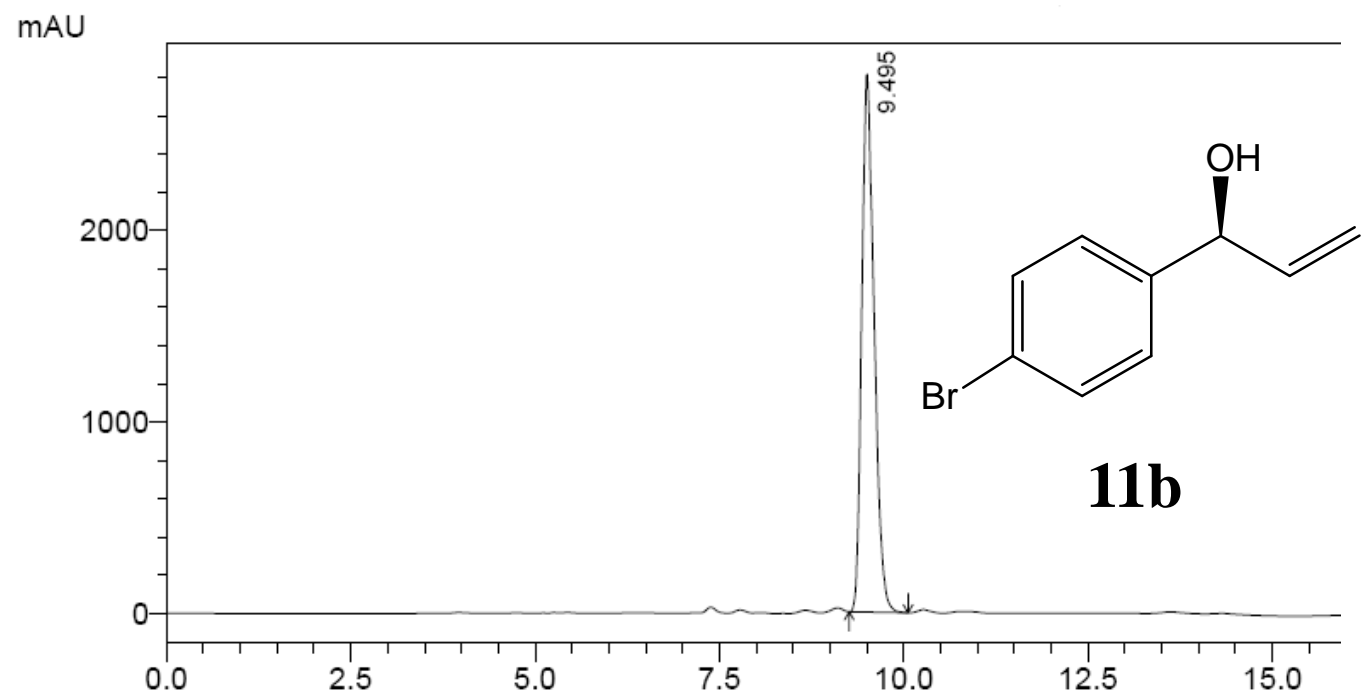

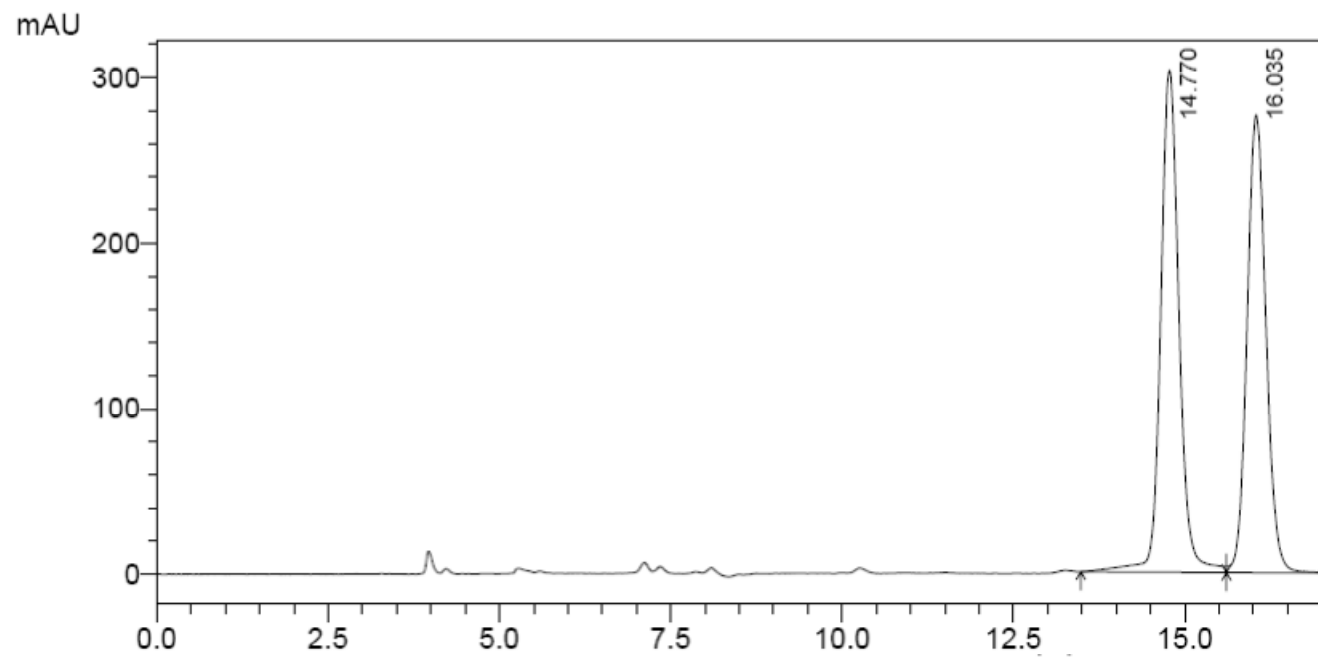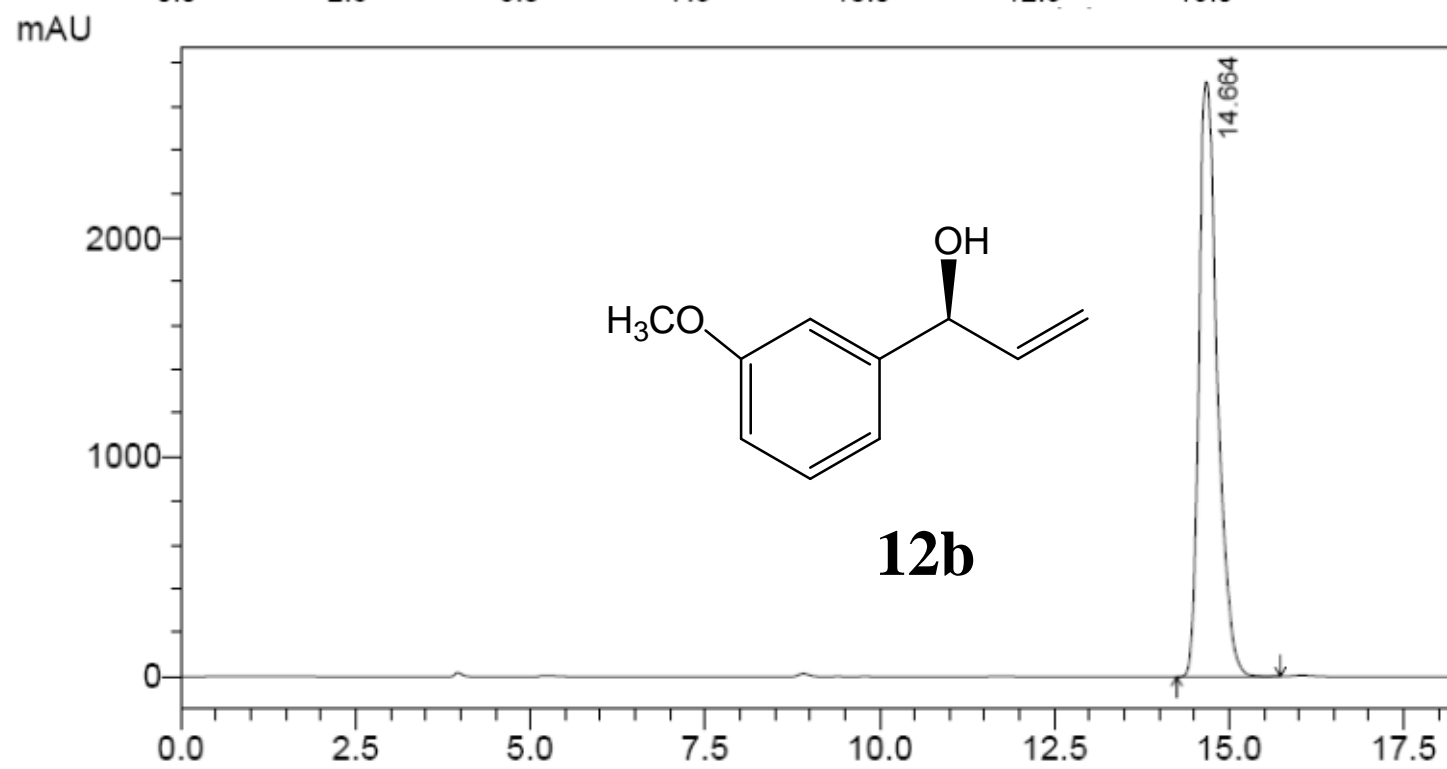

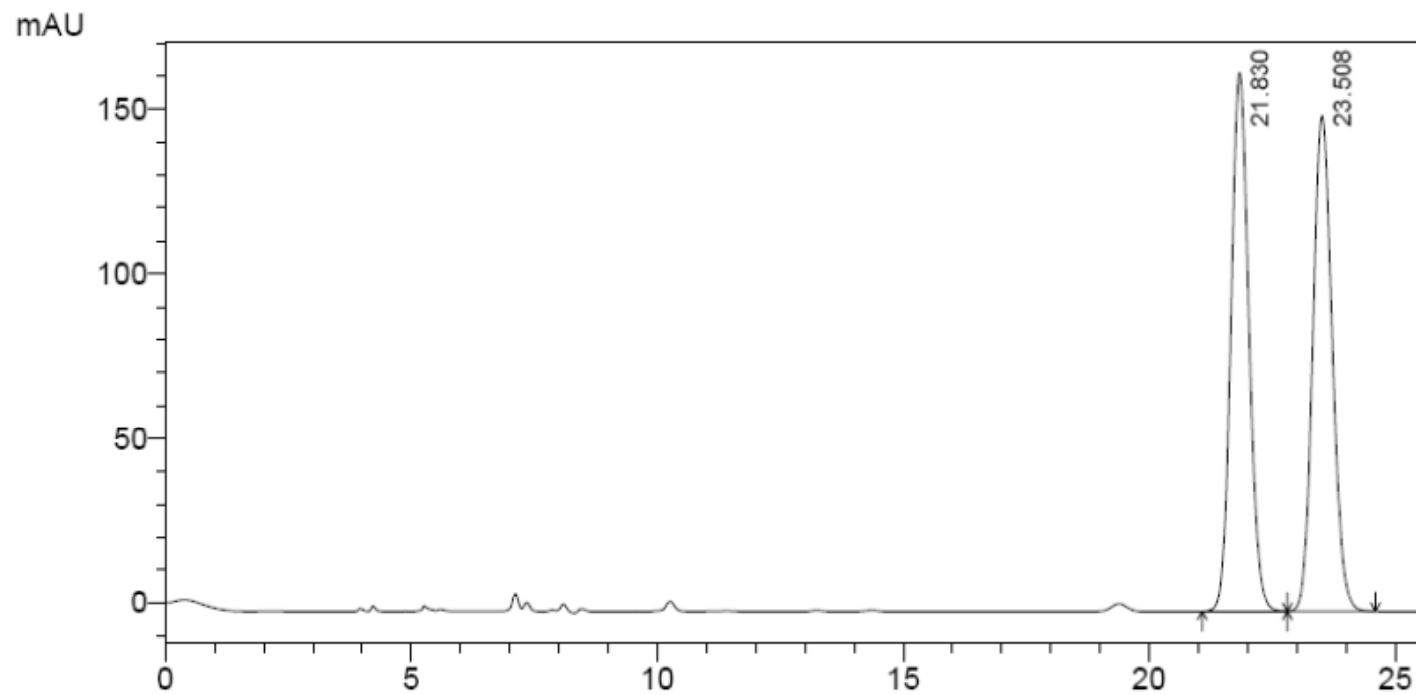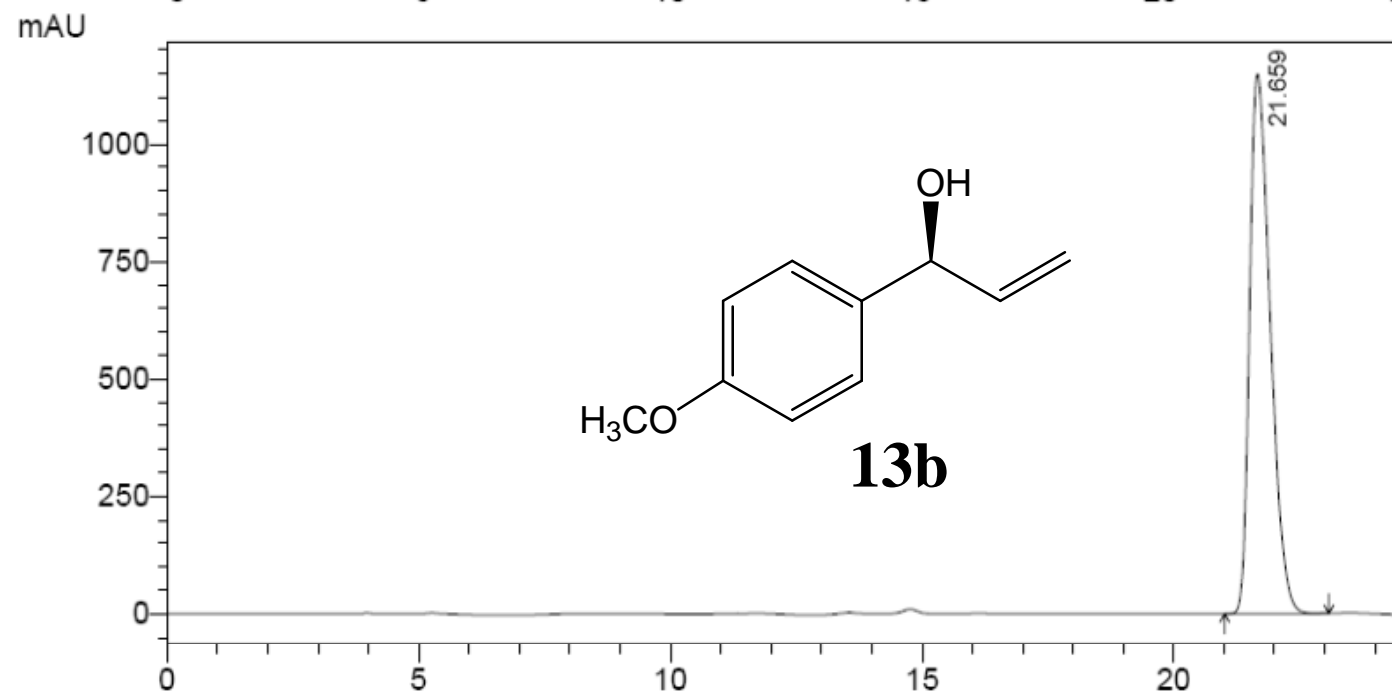

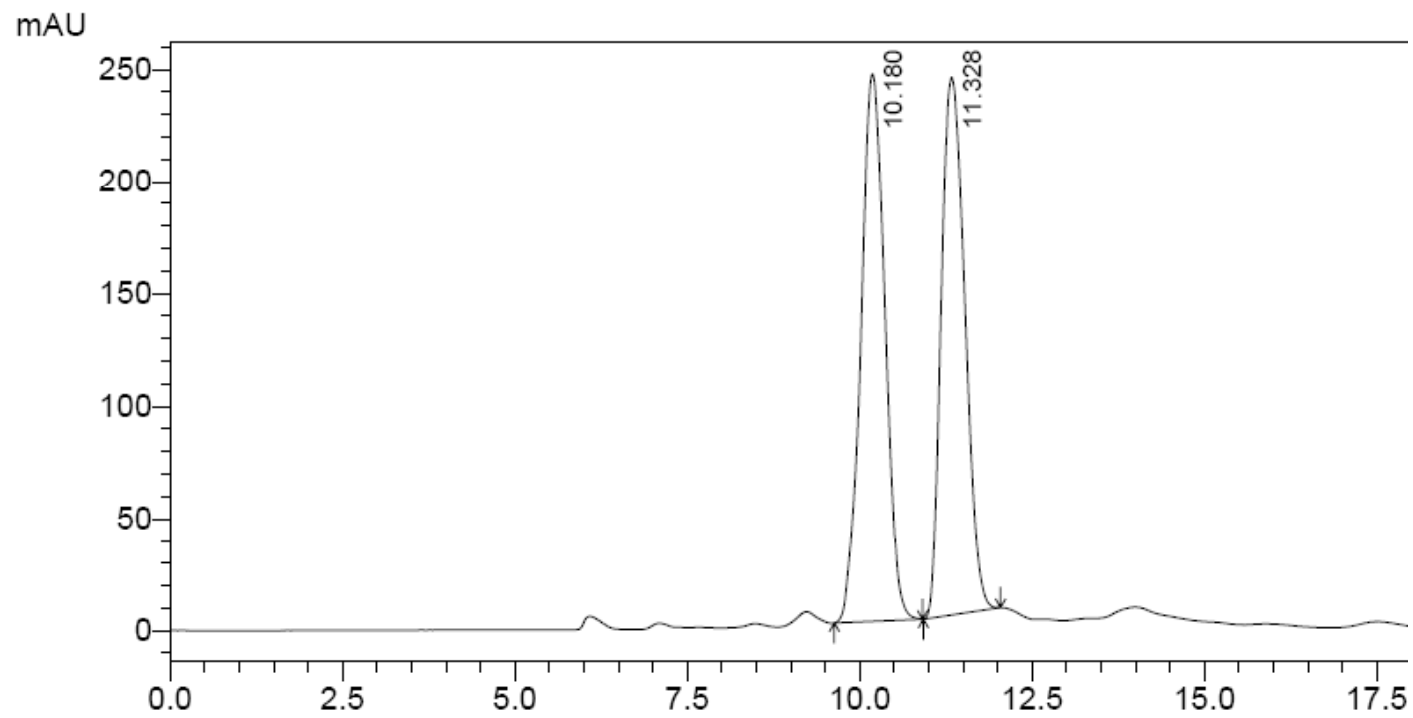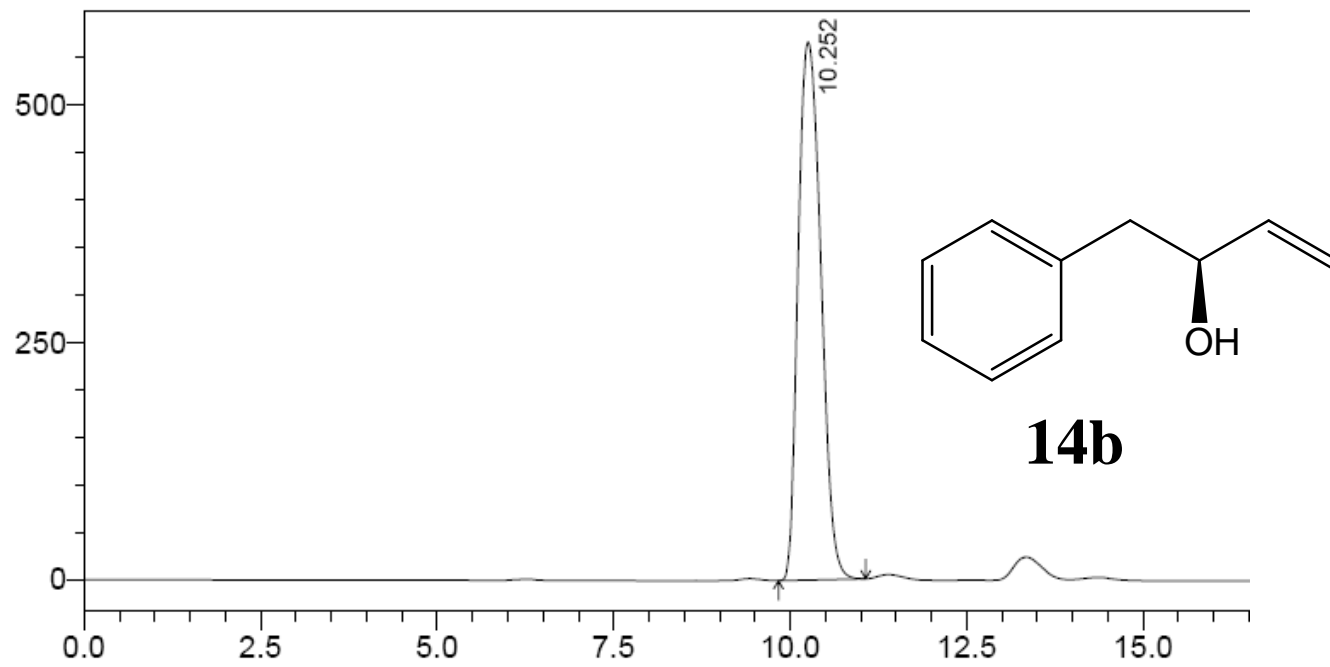

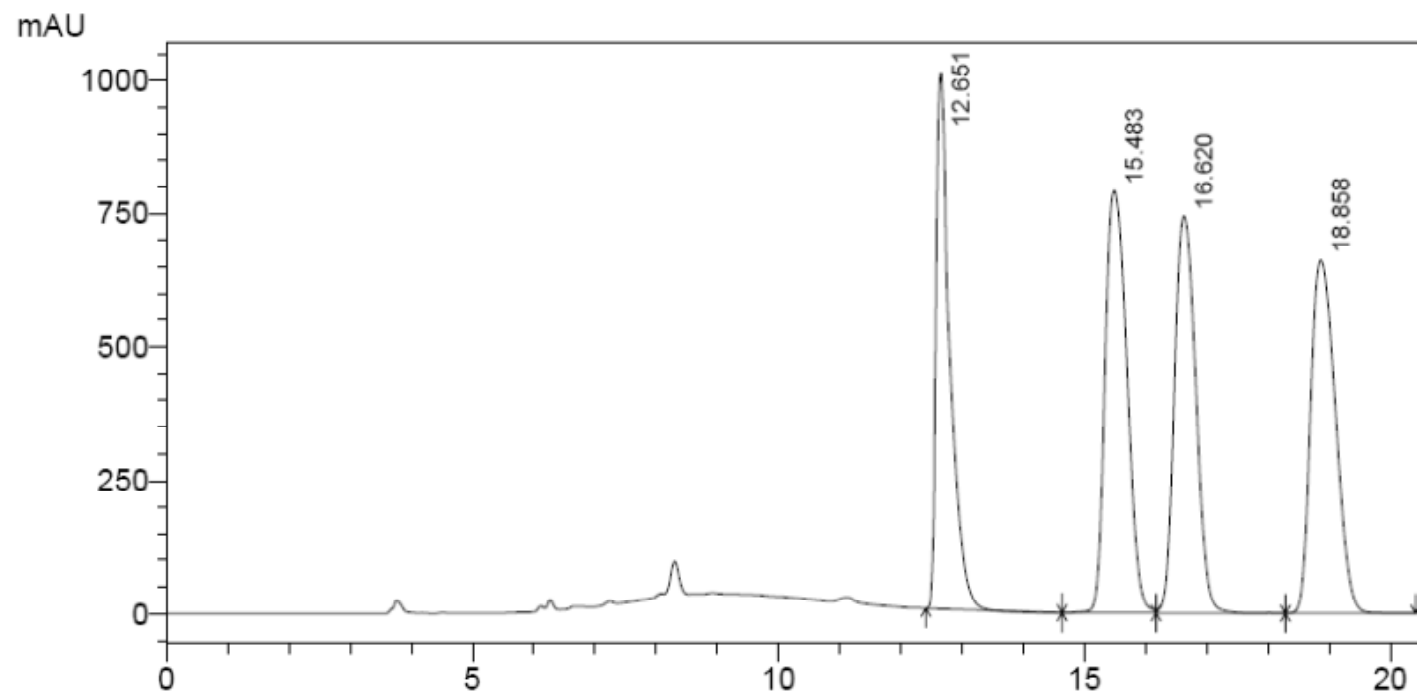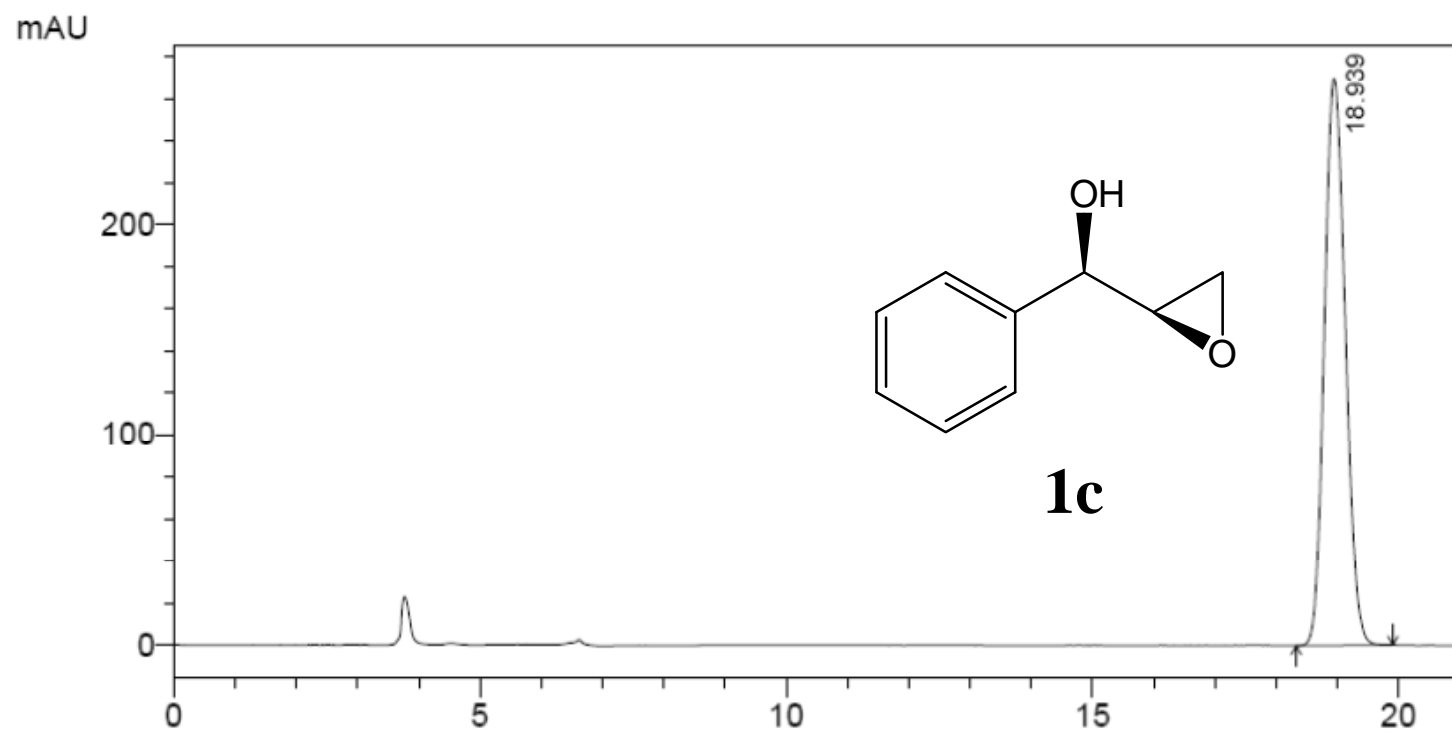



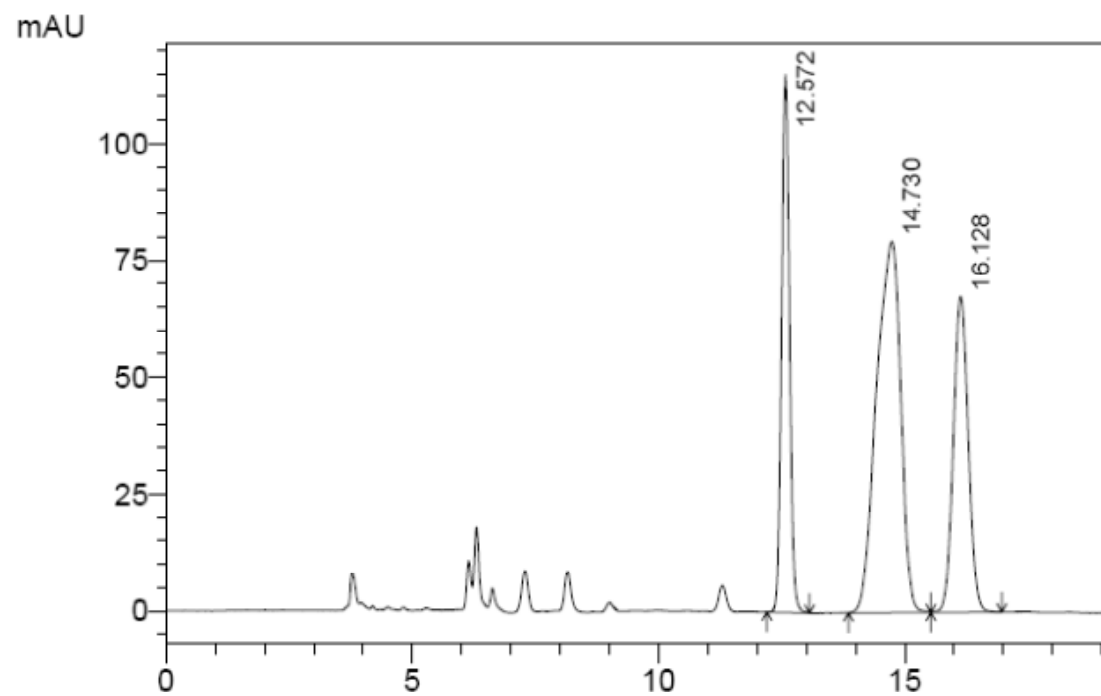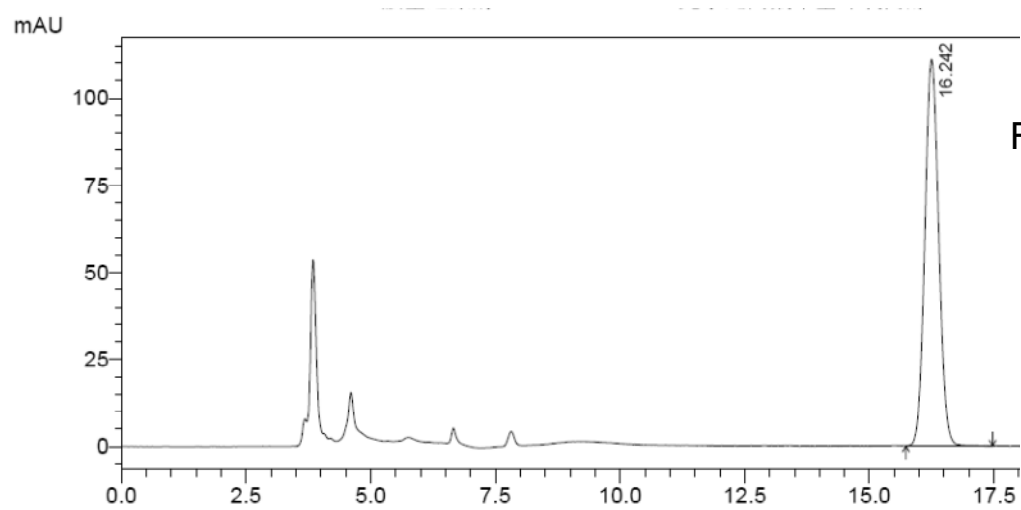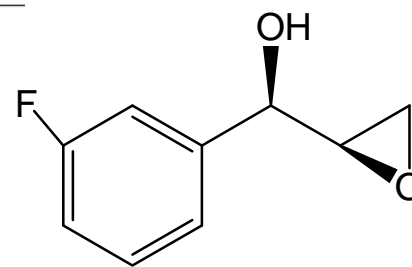

**2c**

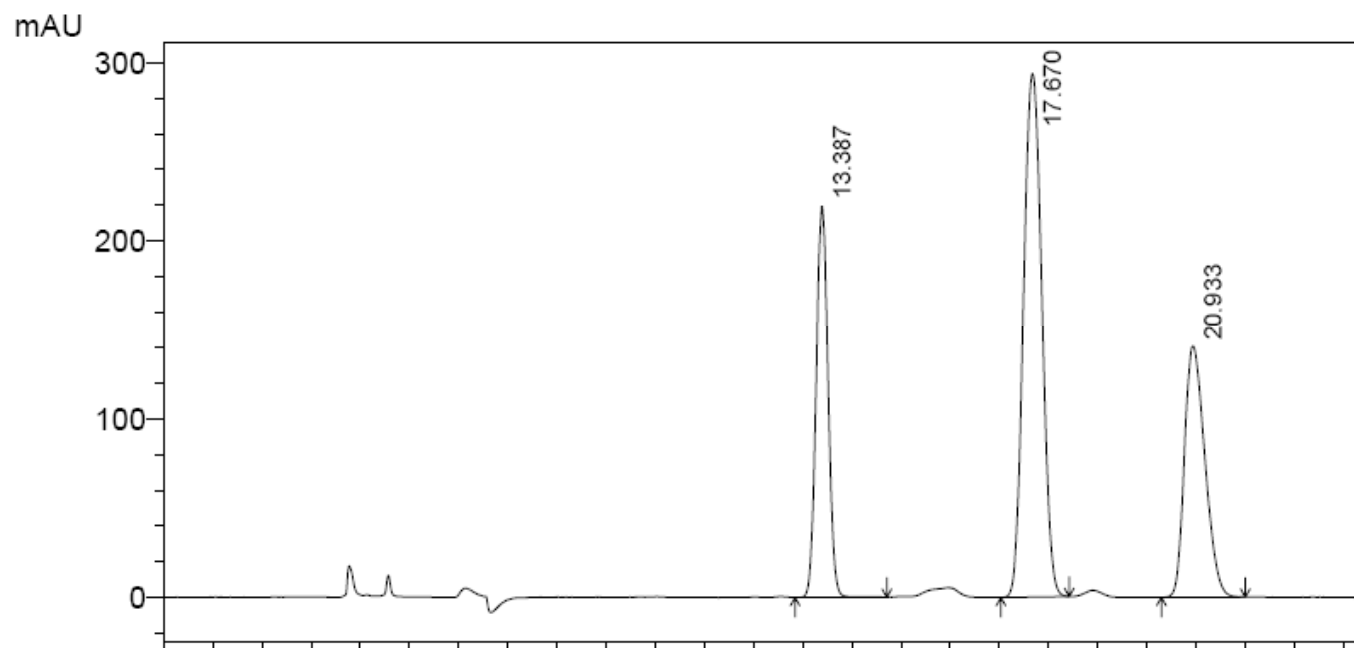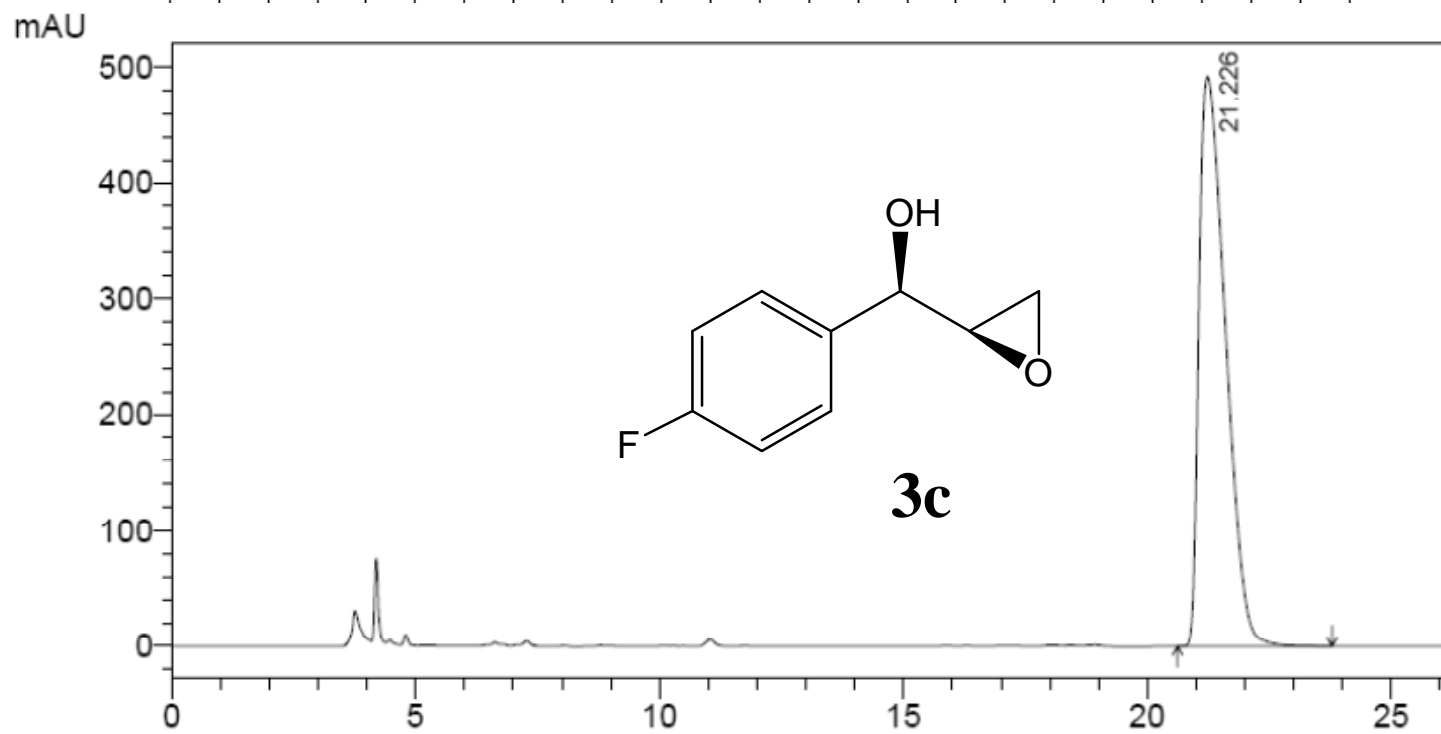

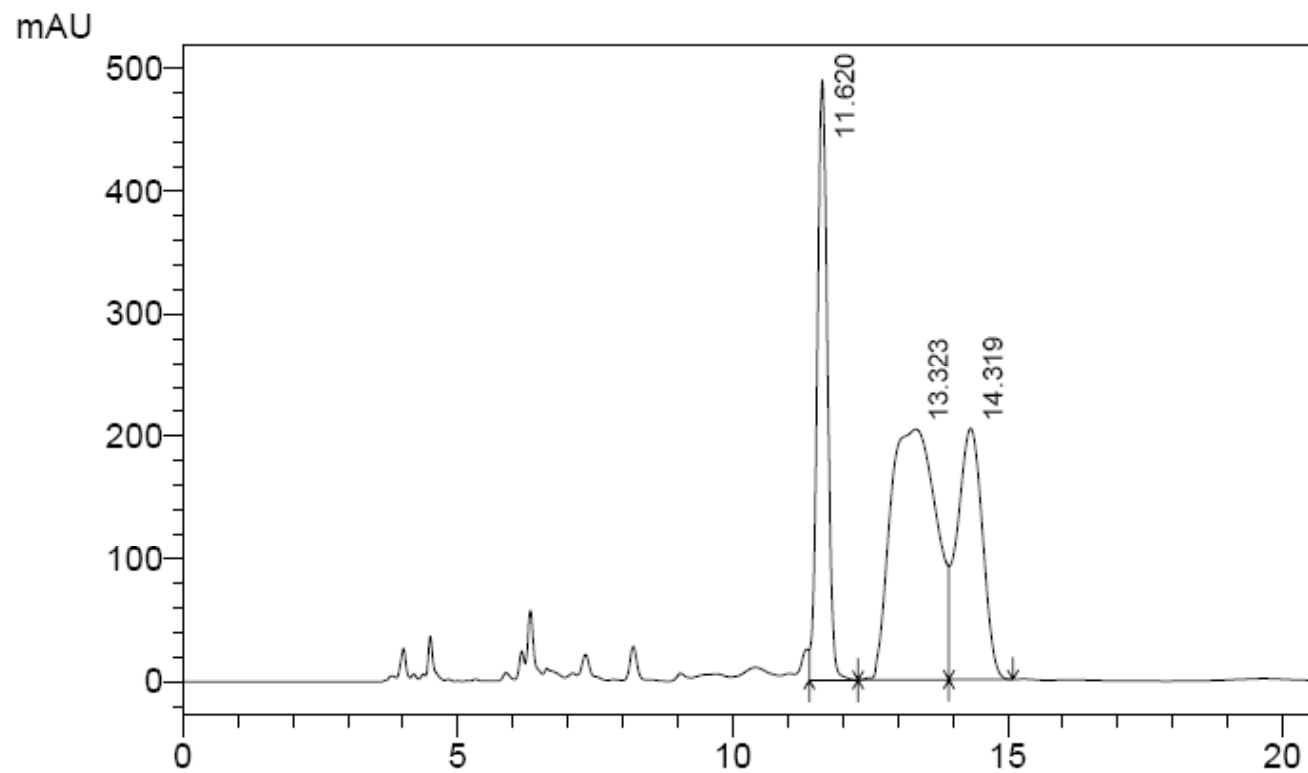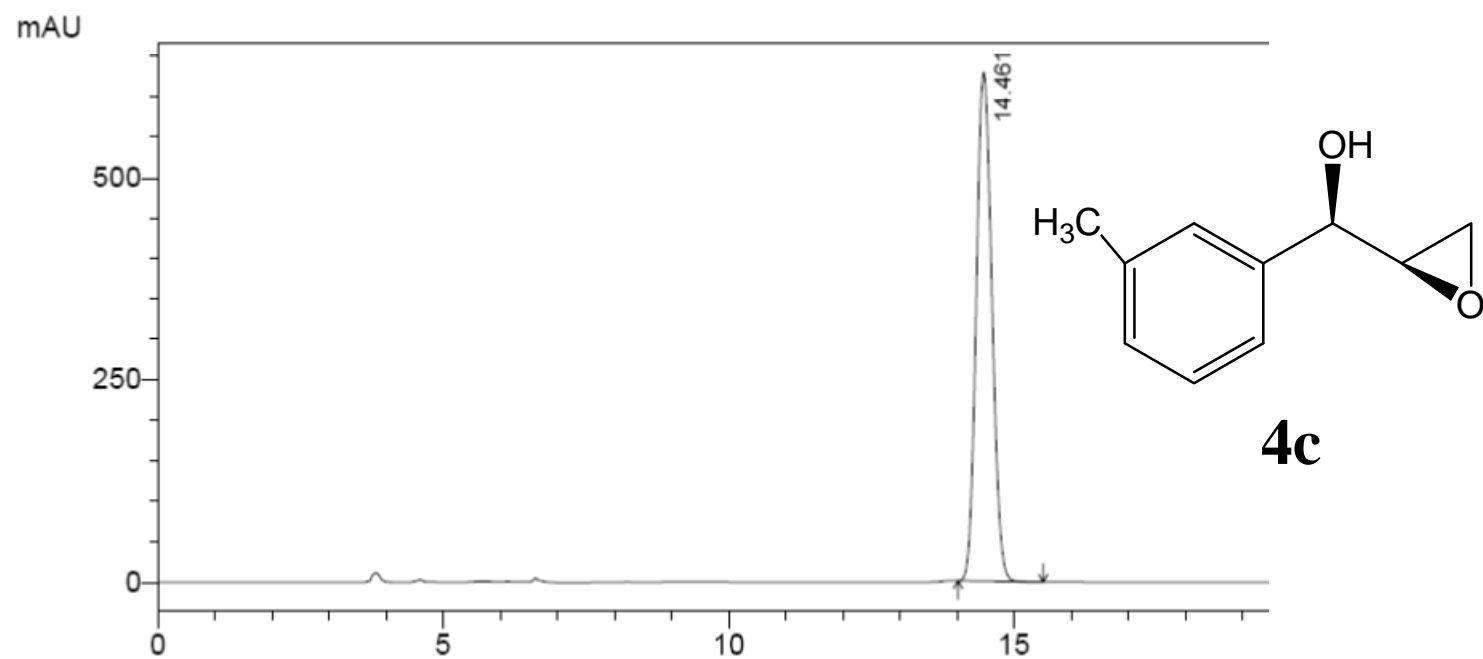

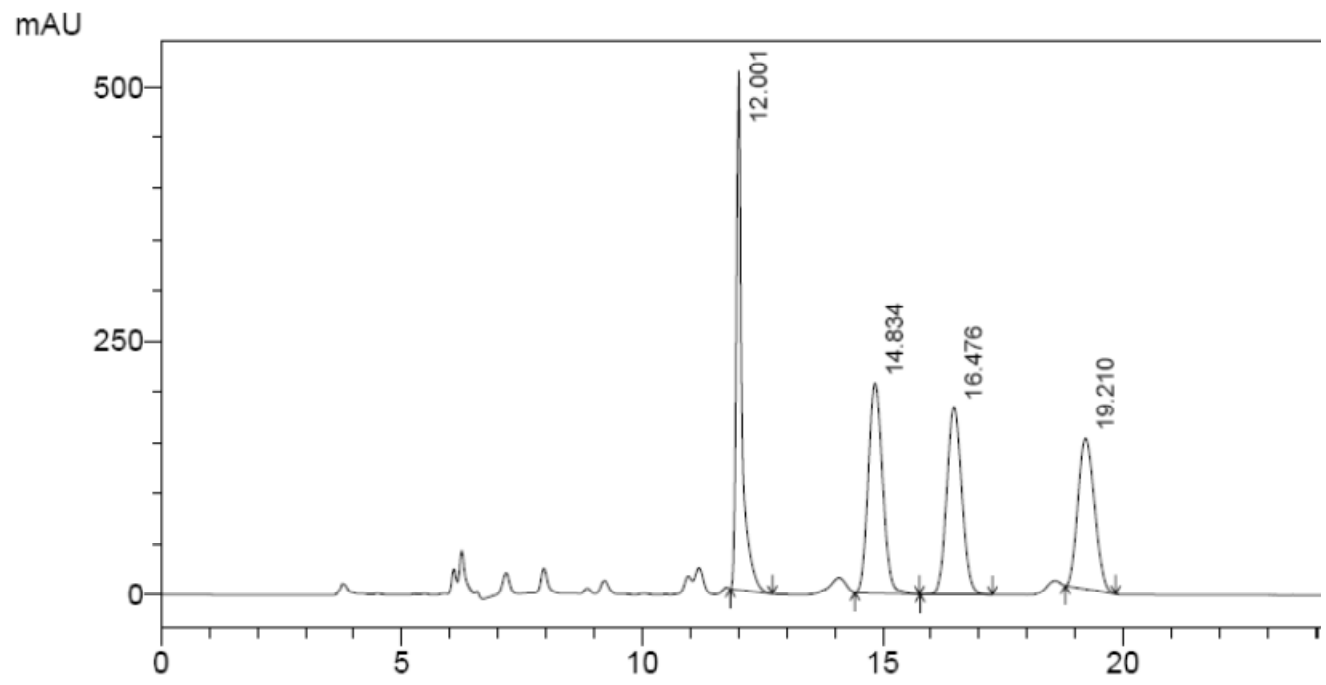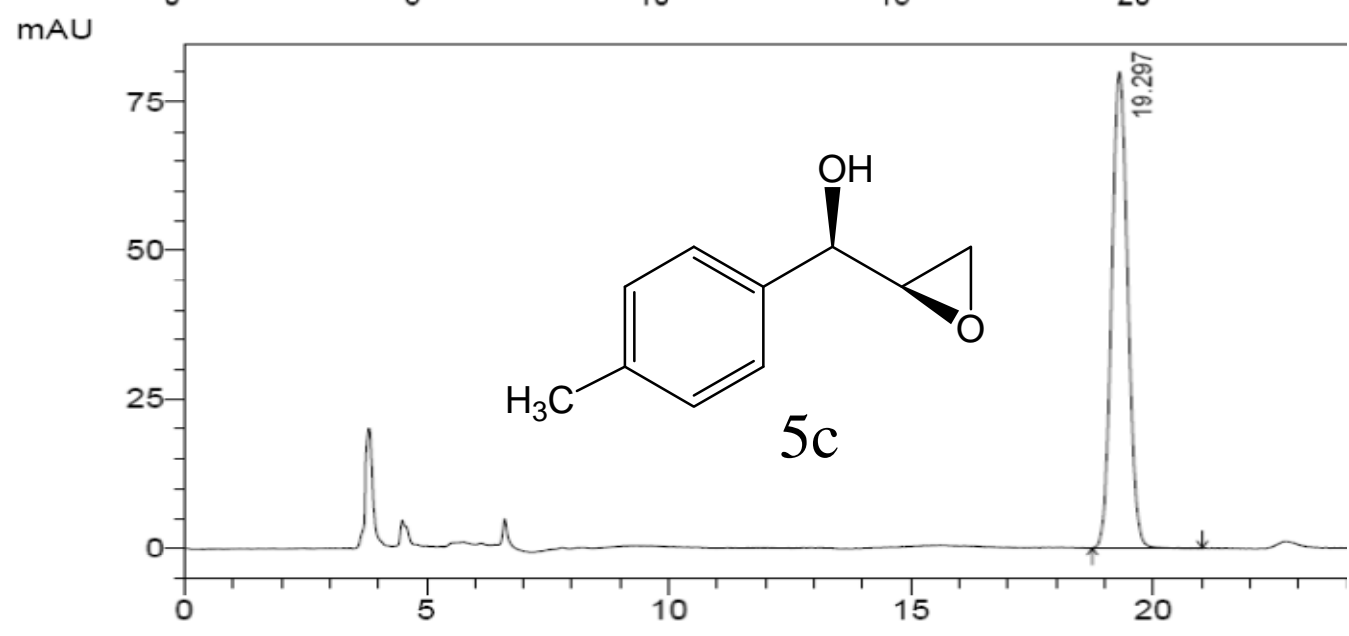

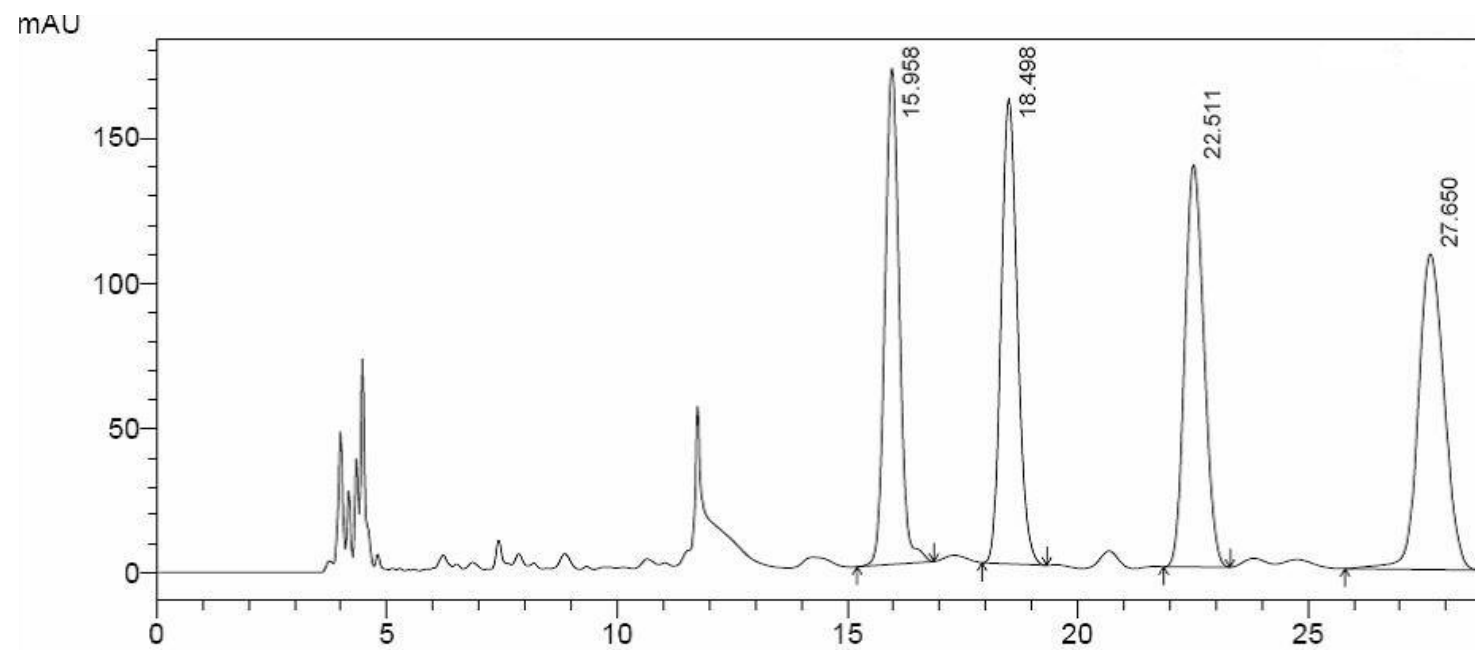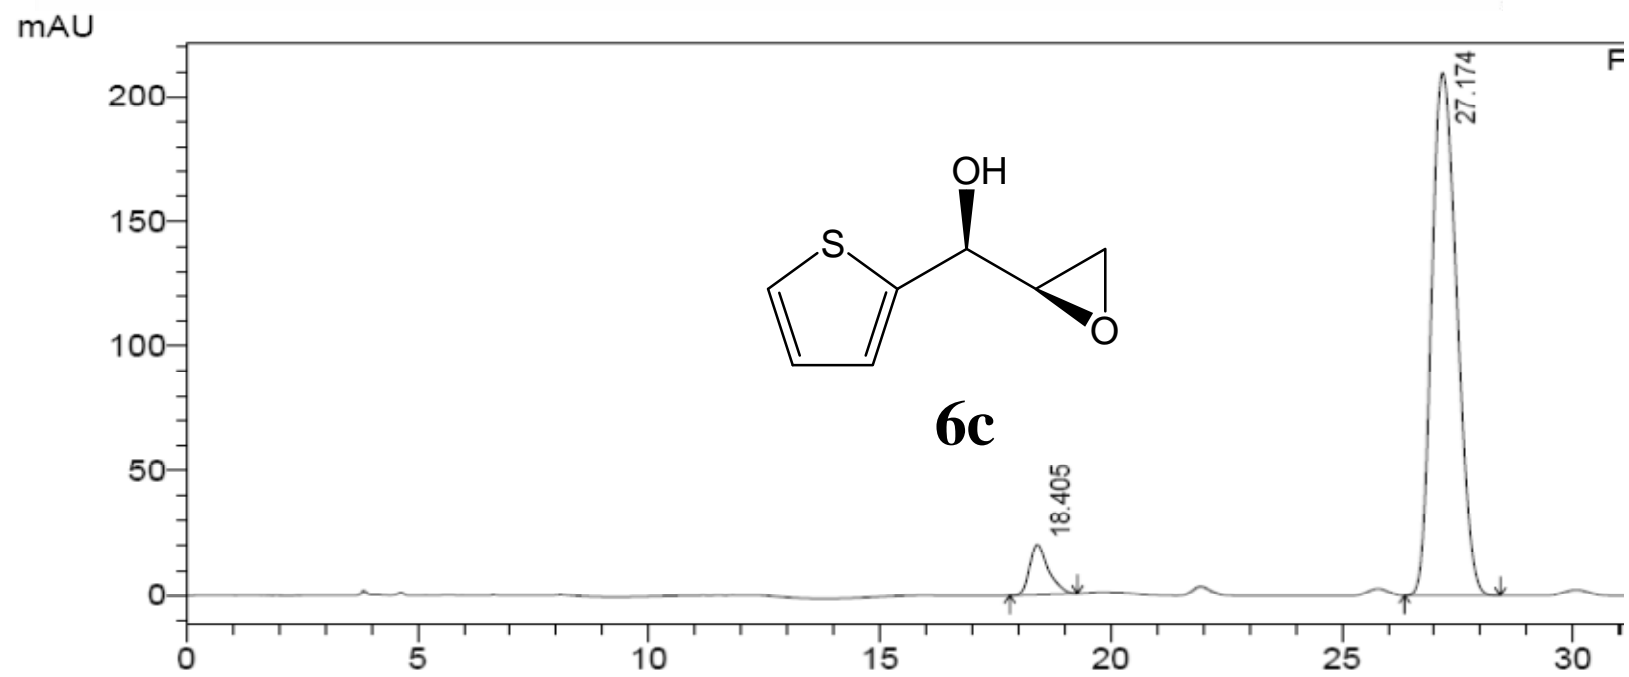

mAU

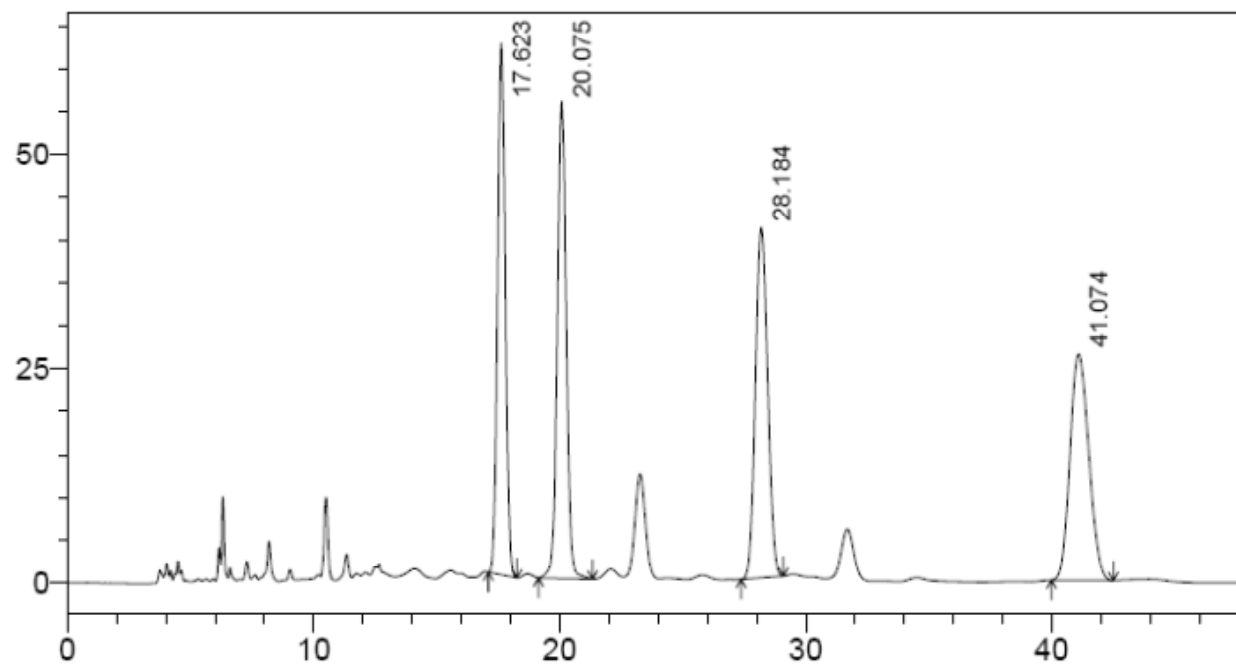

mAU

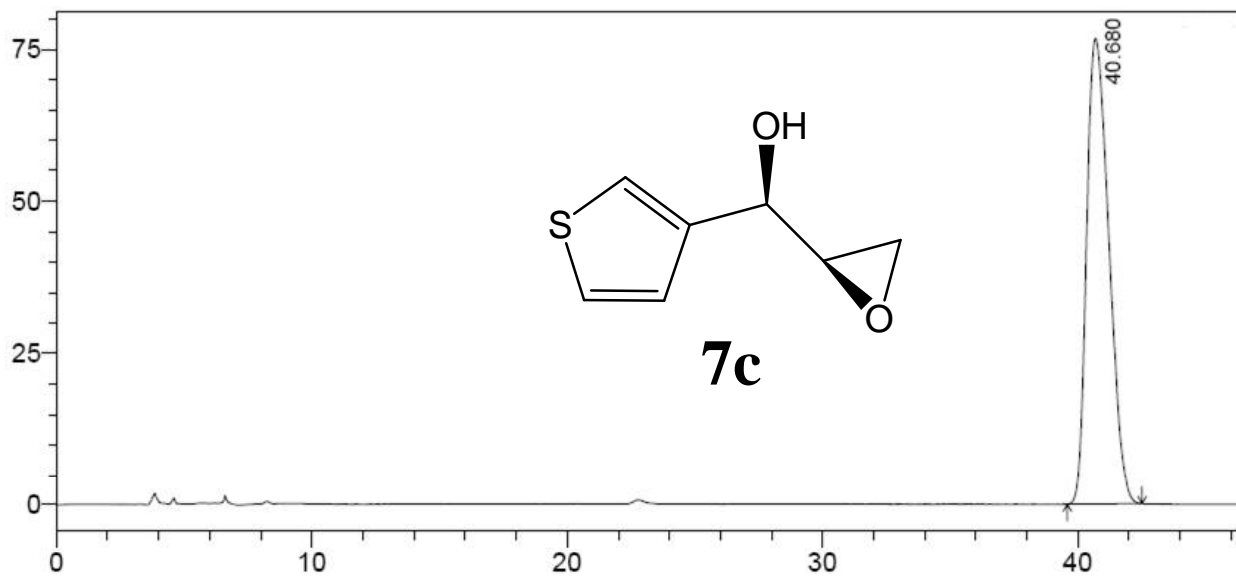

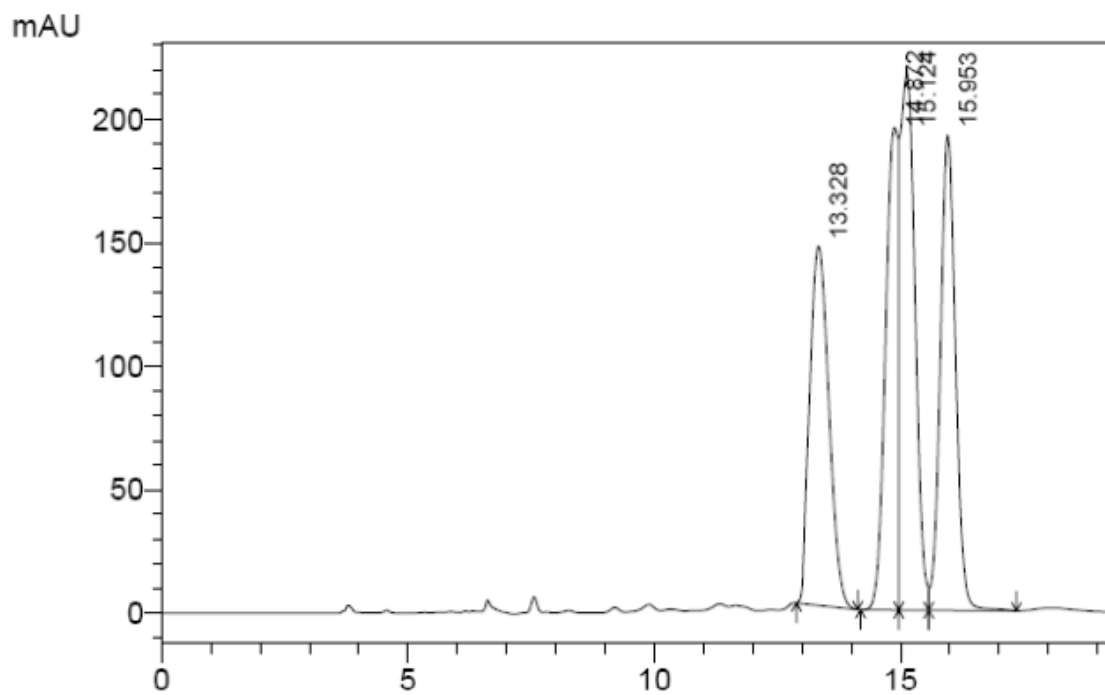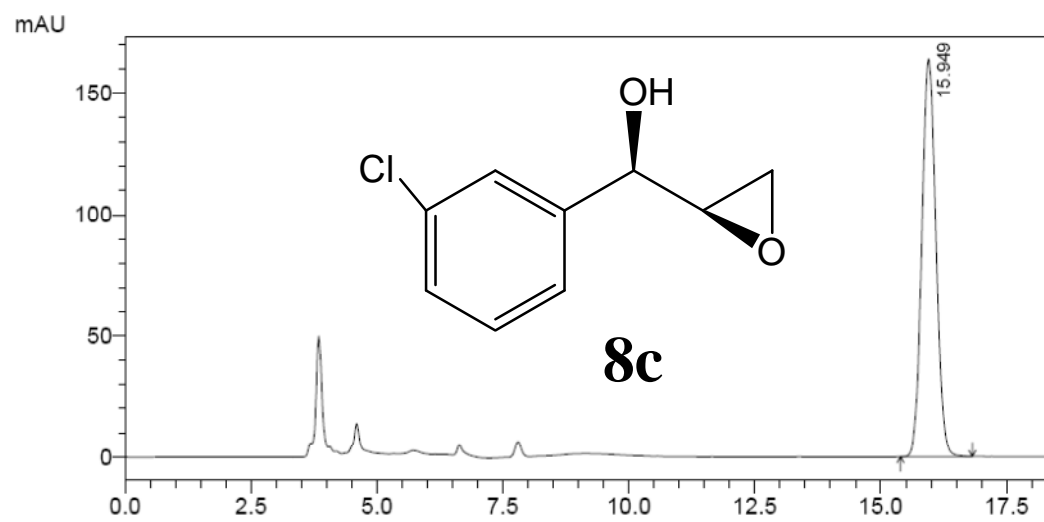

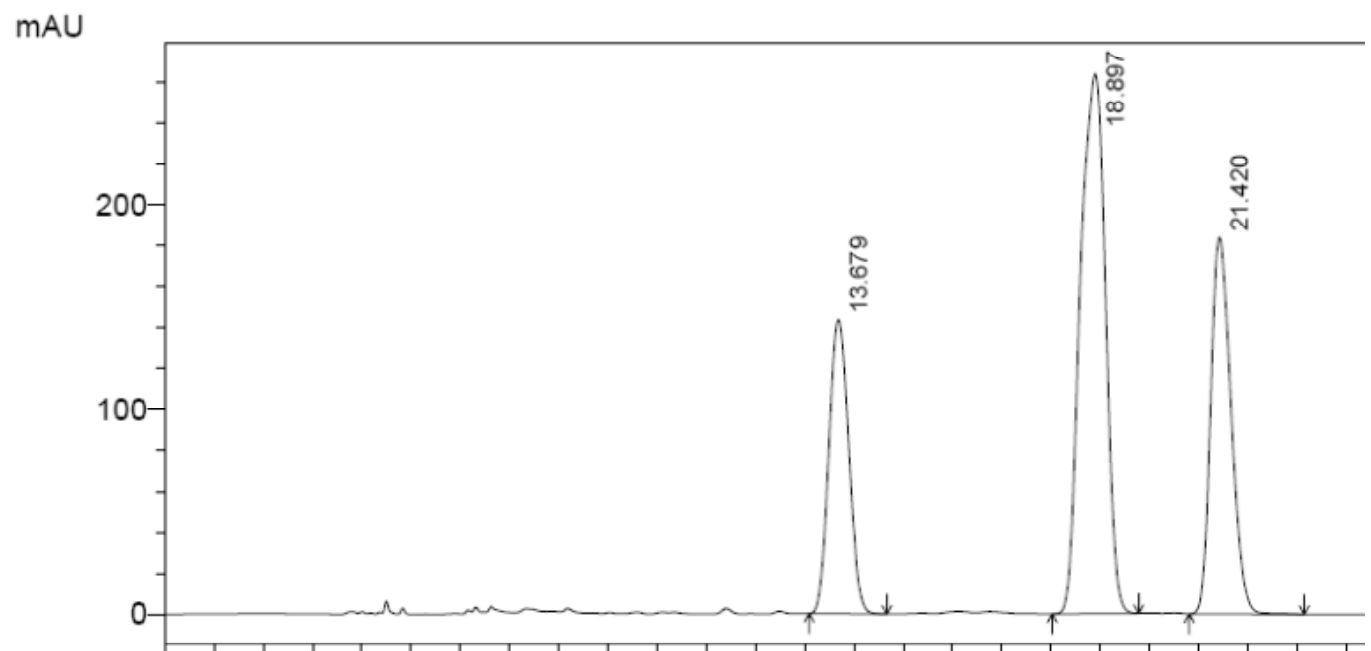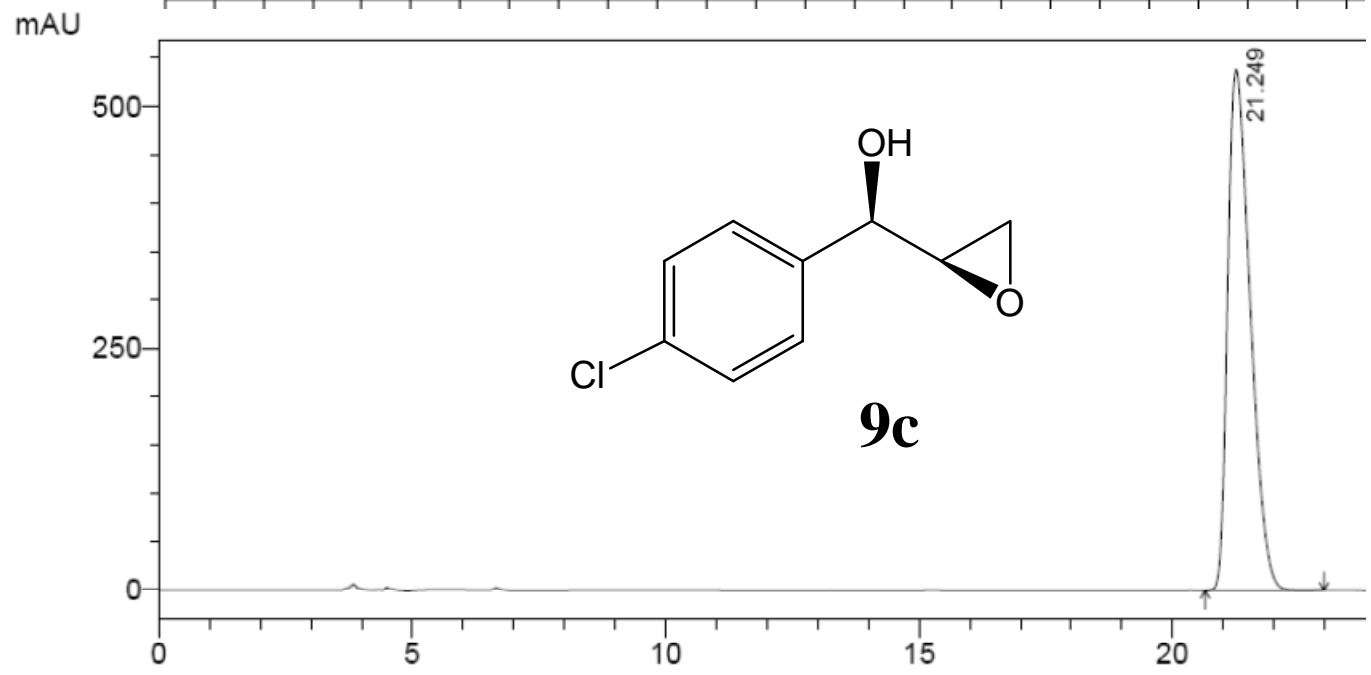



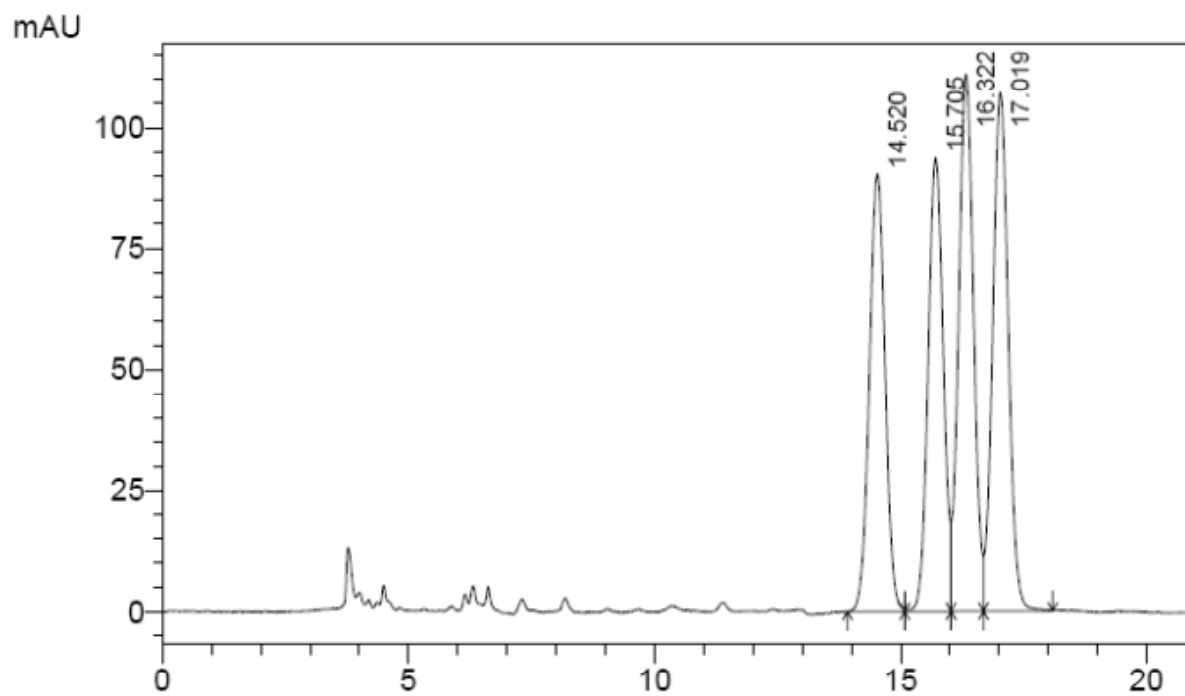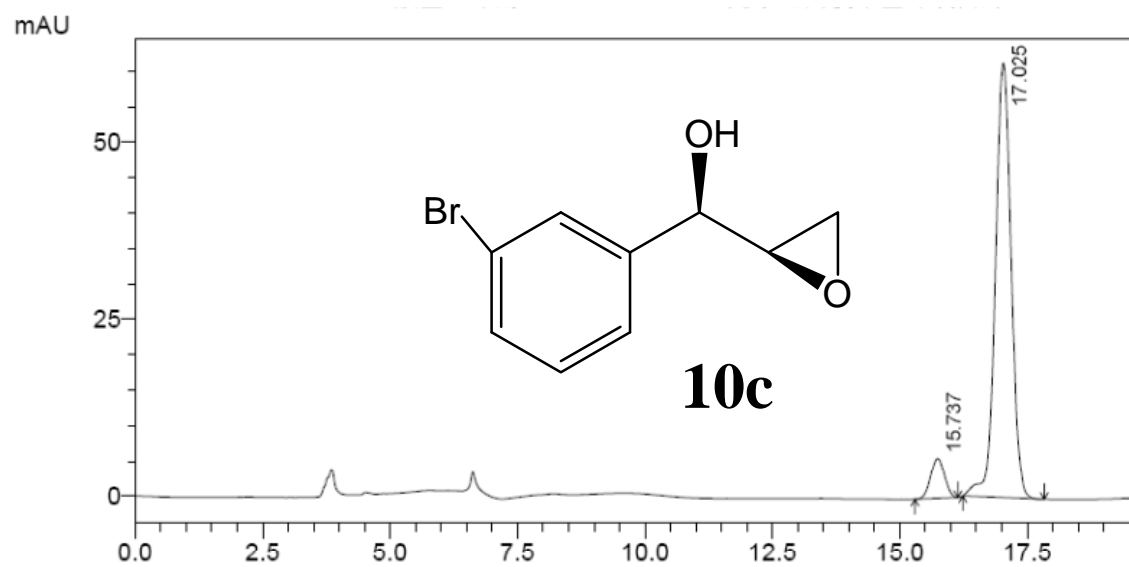

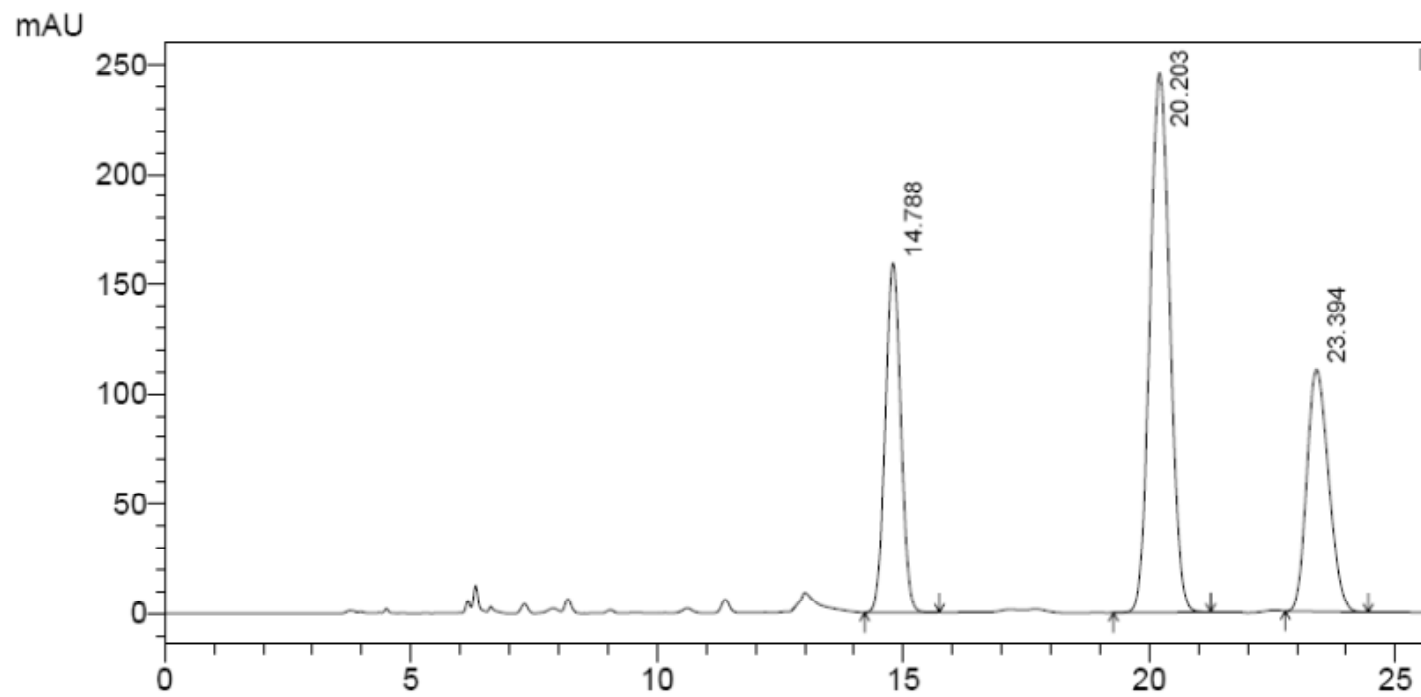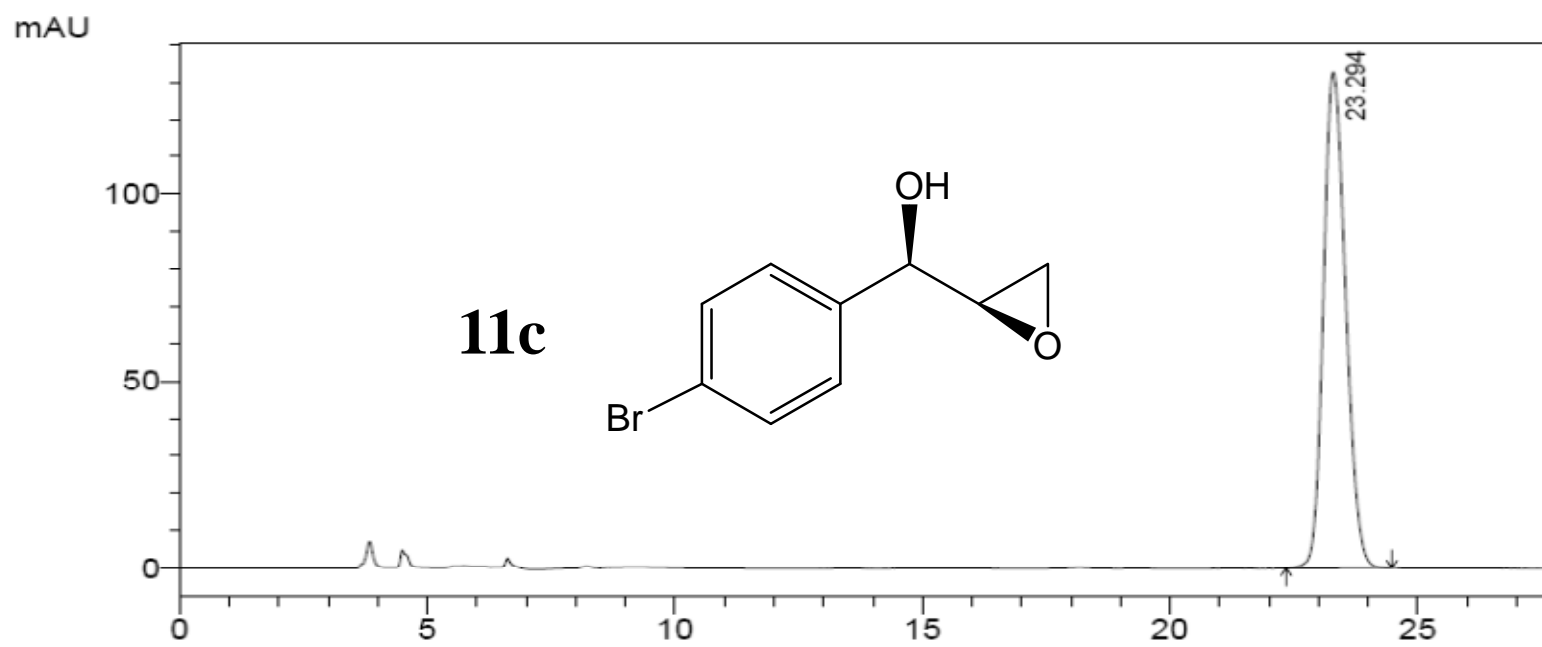

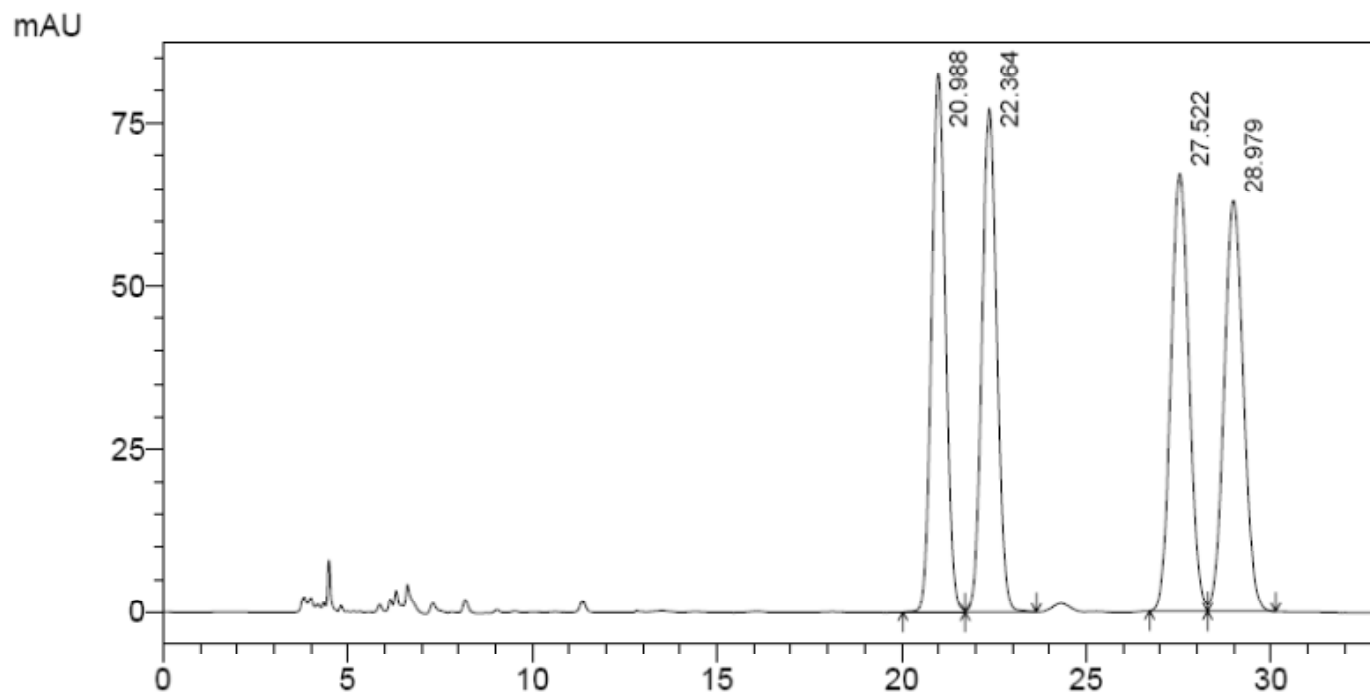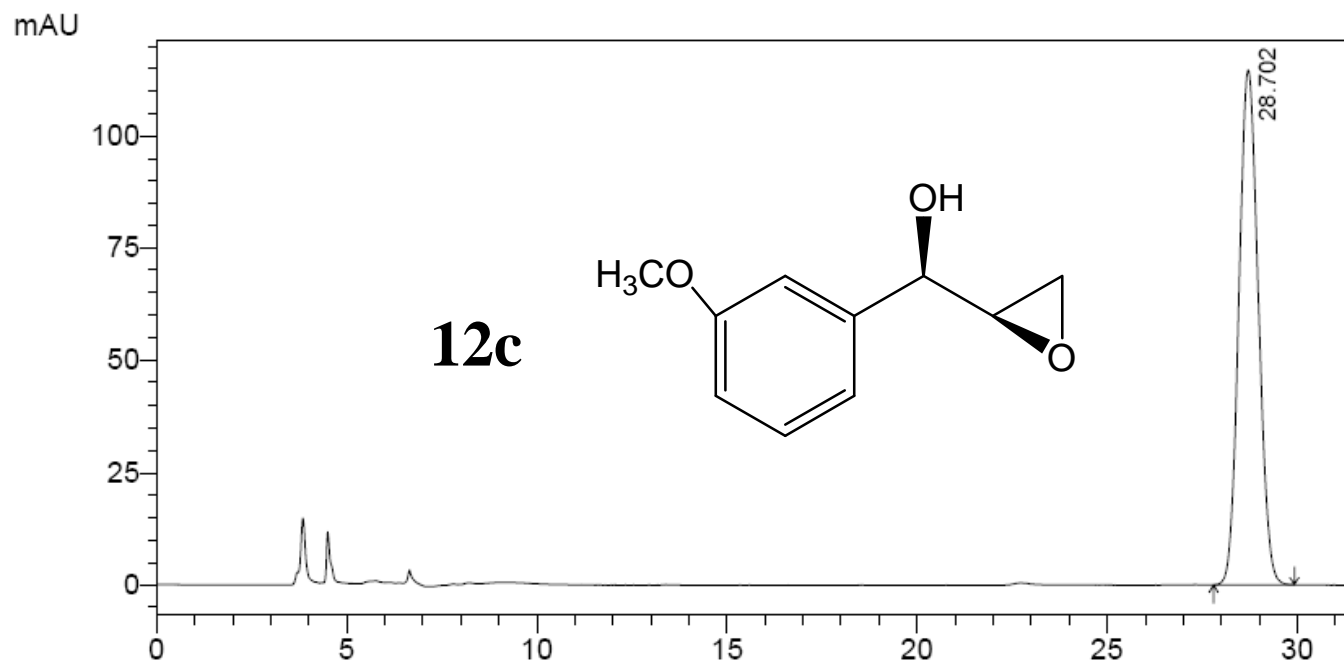

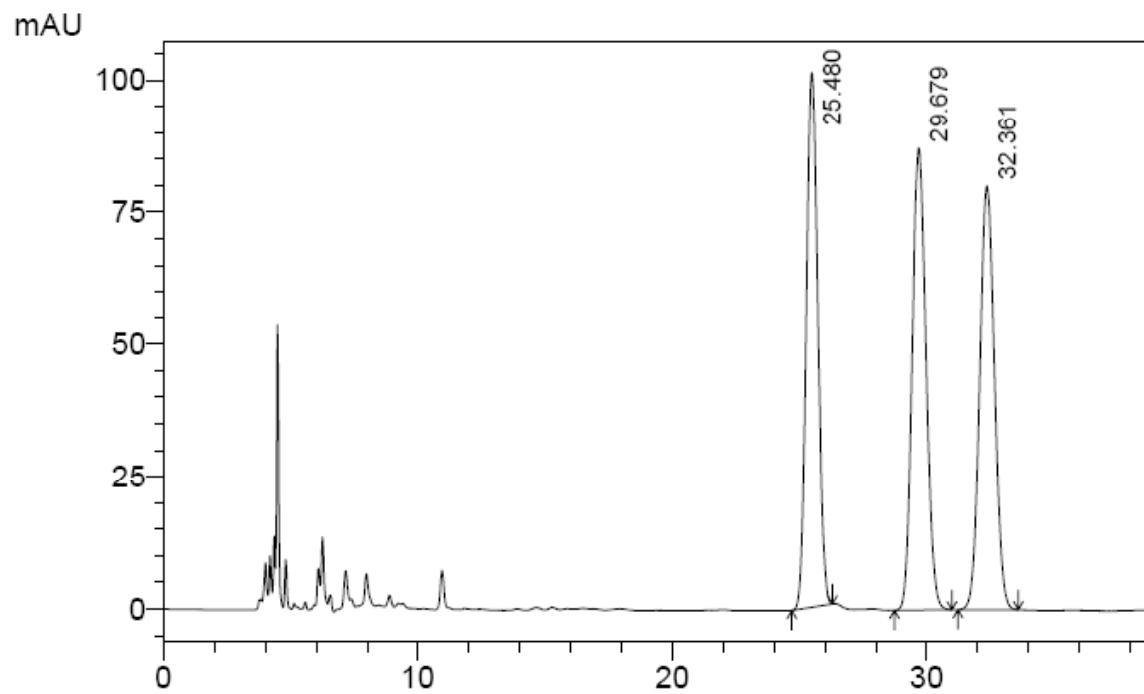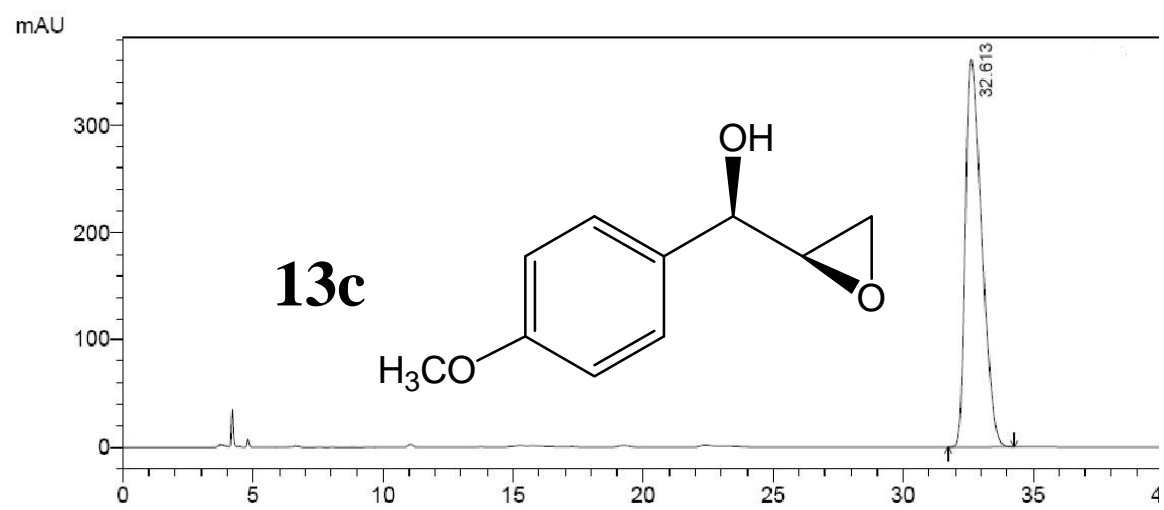

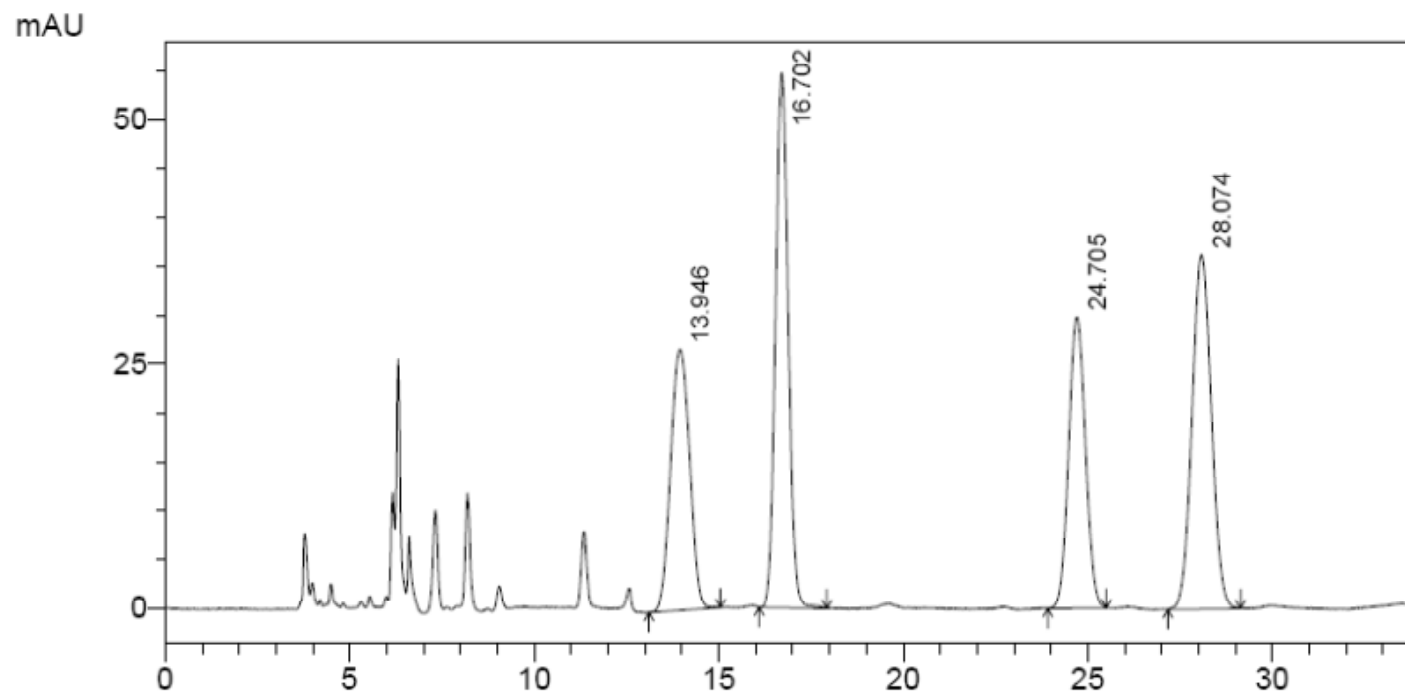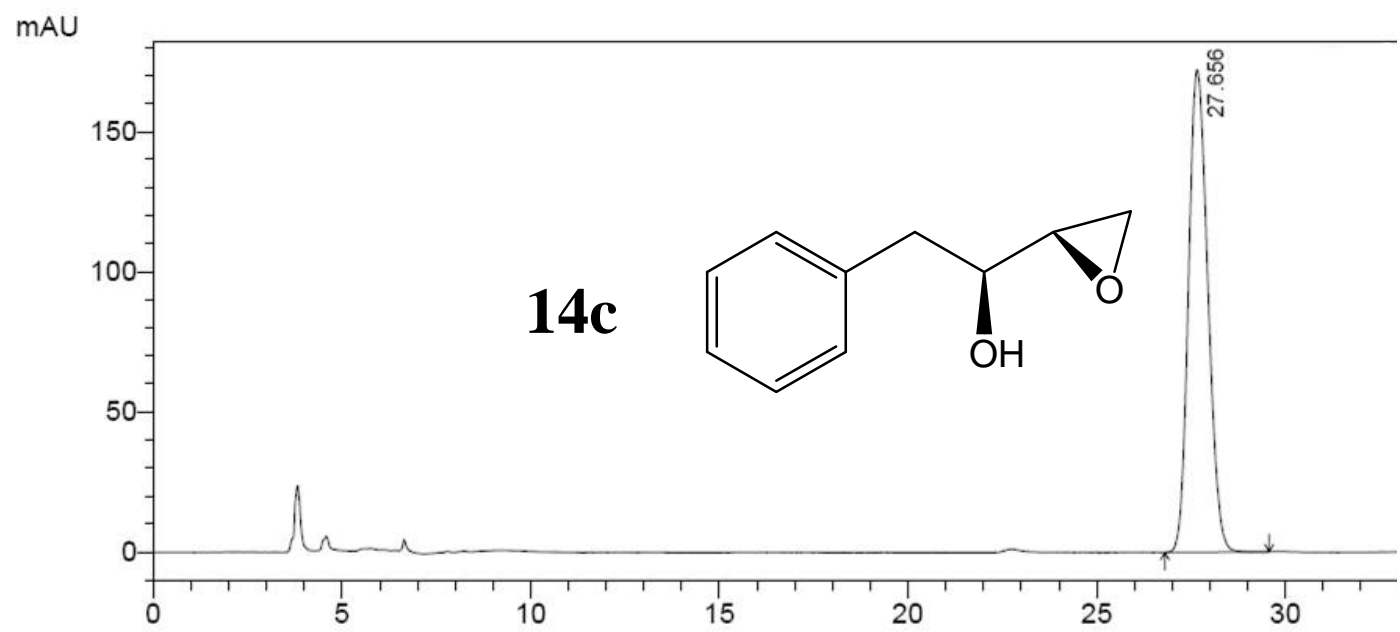

Supplement: c4ob02186j1.pdf [file c4ob02186j1.pdf]
